# Supplementary material for: Serotyping dengue virus with isothermal amplification and a portable sequencer
Source: PubMed Central journal article supplement (PMC5471244; doi:10.1038/s41598-017-03734-5), 2017-06-14
Supplement: 41598_2017_3734_MOESM1_ESM.pdf [file 41598_2017_3734_MOESM1_ESM.pdf]

## Supplementary Files

Serotyping dengue virus with isothermal amplification and a portable sequencer

Junya Yamagishi, Lucky R. Runtuwene, Kyoko Hayashida, Arthur E. Mongan, Lan Anh Nguyen Thi, Linh Nguyen Thuy, Cam Nguyen Nhat, Kriengsak Limkittikul, Chukiat Sirivichayakul, Nuankanya Sathirapongsasuti, Martin Frith, Wojciech Makalowski, Yuki Eshita, Sumio Sugano, Yutaka Suzuki



**c** Control Den 1

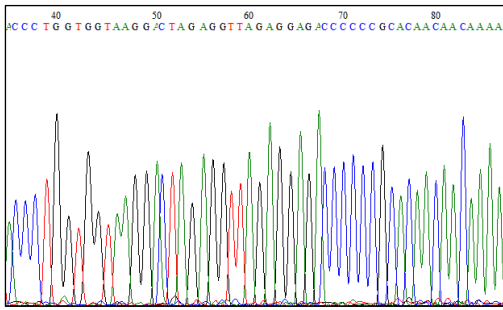

Control Den 3

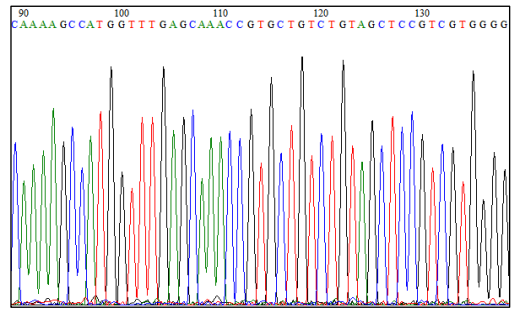

Control Den 2

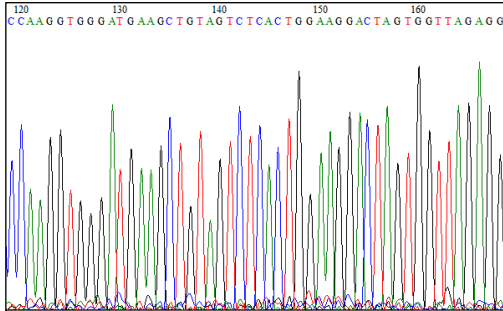

Control Den 4

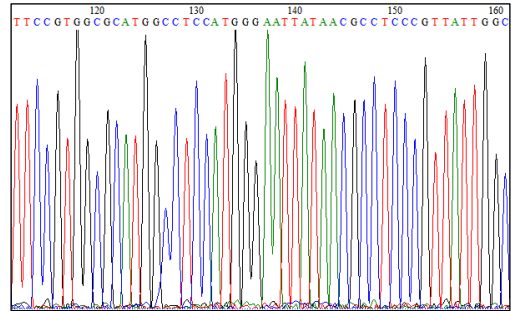

**Figure S1 | The schematics of LAMP.**

a, Schematic representation of LAMP. Using six pair of primers, LAMP amplify the target DNA or RNA into a ladder configuration. Briefly, the primers form the indicated hairpin structure, which allows turn back priming of the DNA polymerase in an isothermal reaction. For further details, see the reference. b, Primers used for the LAMP amplification for each serotype. Asterisks at the bottom indicate the common bases between the serotypes. For the alignment, the genome sequences of D1-D4 are aligned using ClustalW. c, Sanger sequencing of the control viral RNAs.

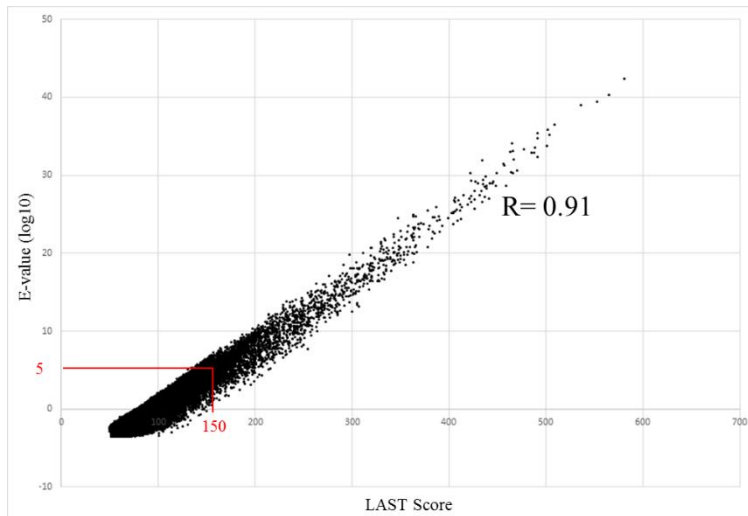

**Figure S2 | The correlation between LAST score and e-value.**

Each sequence obtained from a sequence run had an e-value calculated using the LAST option and this value was compared with its LAST score. The e-value corresponding to a LAST score of 150 is highlighted. Pearson's correlation is also shown.

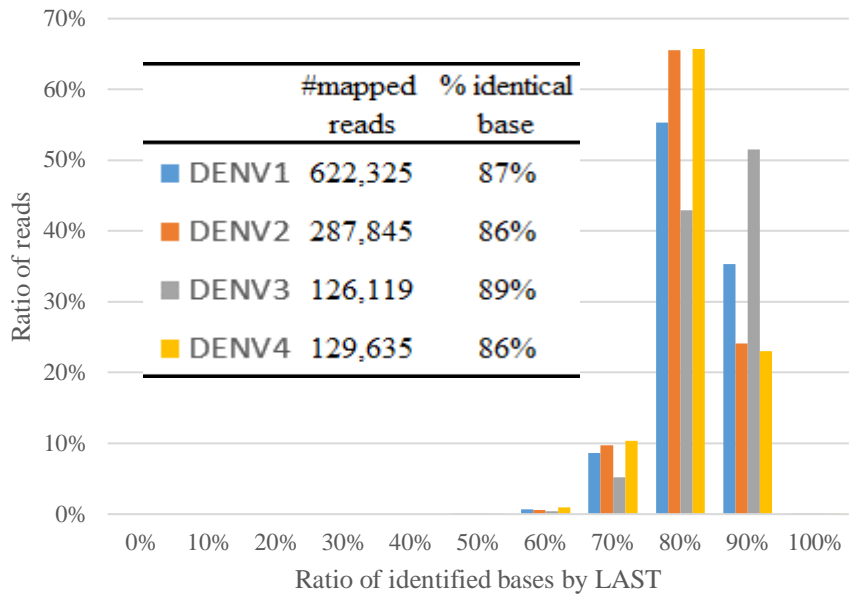

**Figure S3 | Sequencing result of control samples obtained by newer version flow cell.**

Accuracy of the sequencing obtained by flow cell version 9.4 was calculated by considering the matched base between each sequence and the corresponding reference genome.



**a**

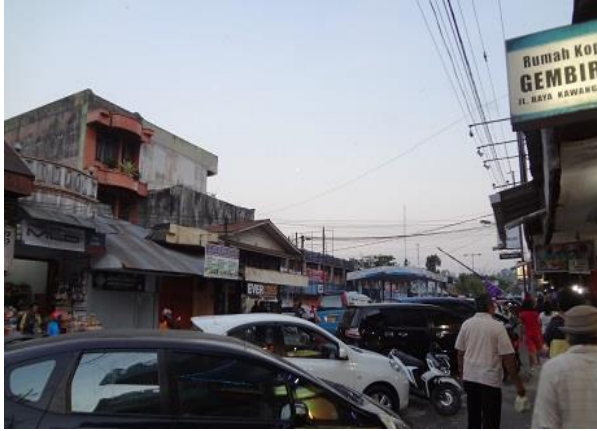

**b**

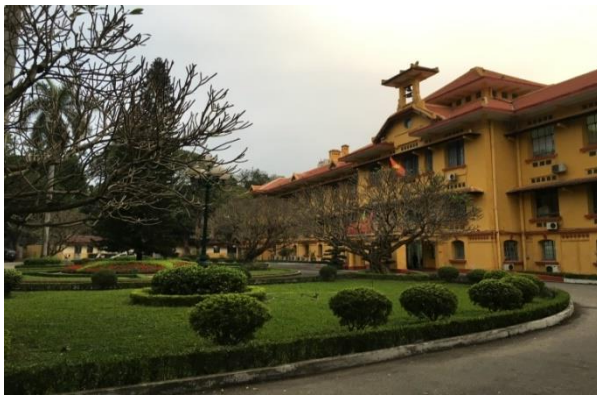

**c**

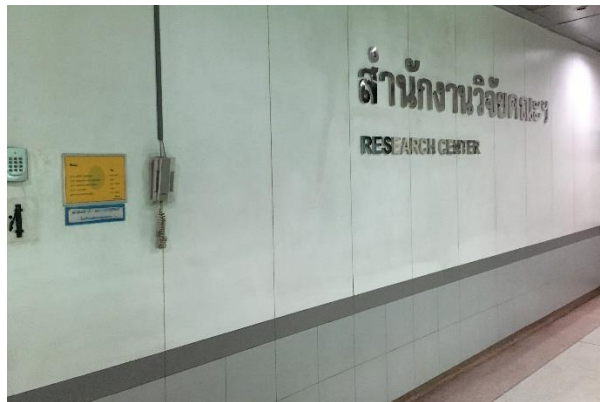

**Figure S5 | On-site MinION sequencing**

The photos of the outlook of the clinics in Indonesia (a), Vietnam (b), and Thailand (c).

a

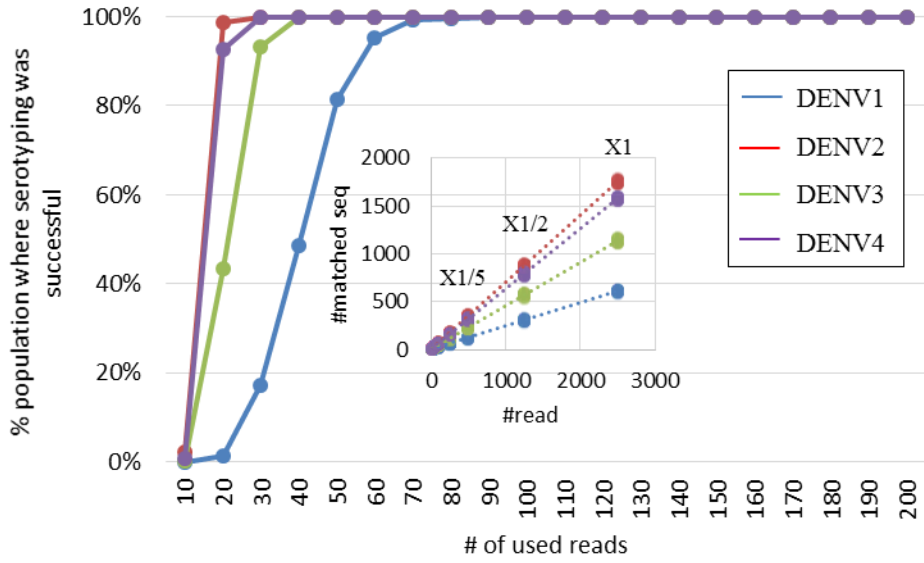

b

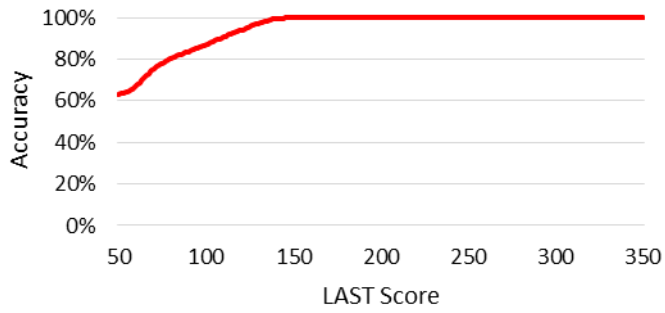

c

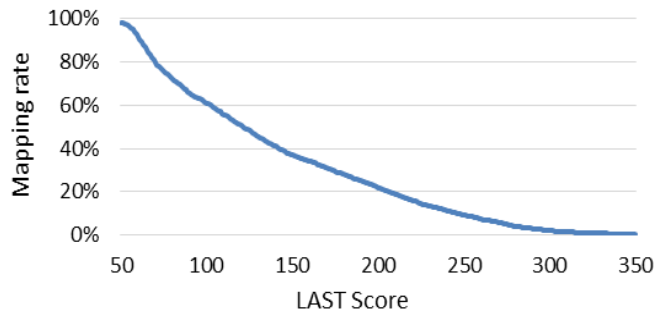

**Figure S6 | Scaling the analysis with barcode oligos.**

**a**, Results from the simulation analysis regarding the number of sequence reads necessary to include more than ten sequence reads supporting the serotyping of the indicated serotype. **b**, **c**, The precision (**b**) and recall (**c**) that separate barcoding oligos.



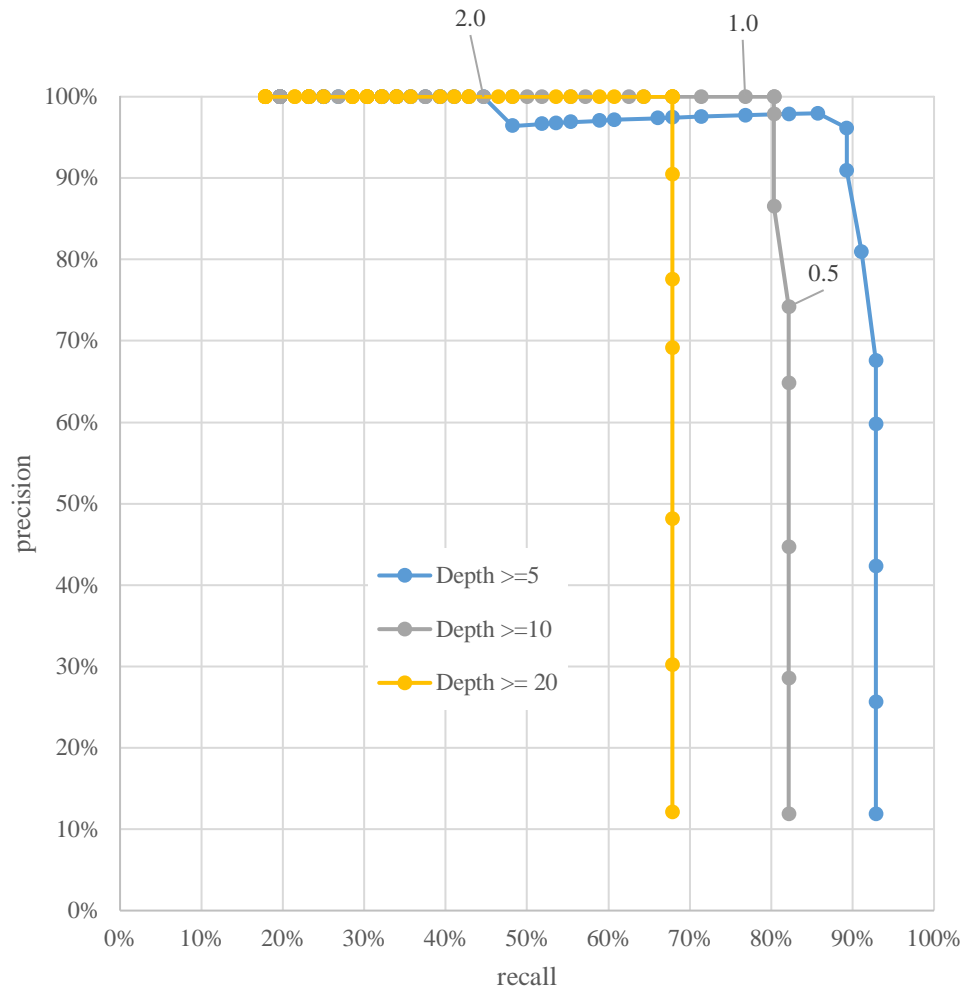

**Figure S7 | Precision plotted against recall**

We employed threshold 2.0 for our analysis, which is conservative with a recall rate lower than 50%. Threshold 1.0, on the other hand, gives varied results among different datasets. For that reason, we did not change our threshold for subsequent analysis.

a

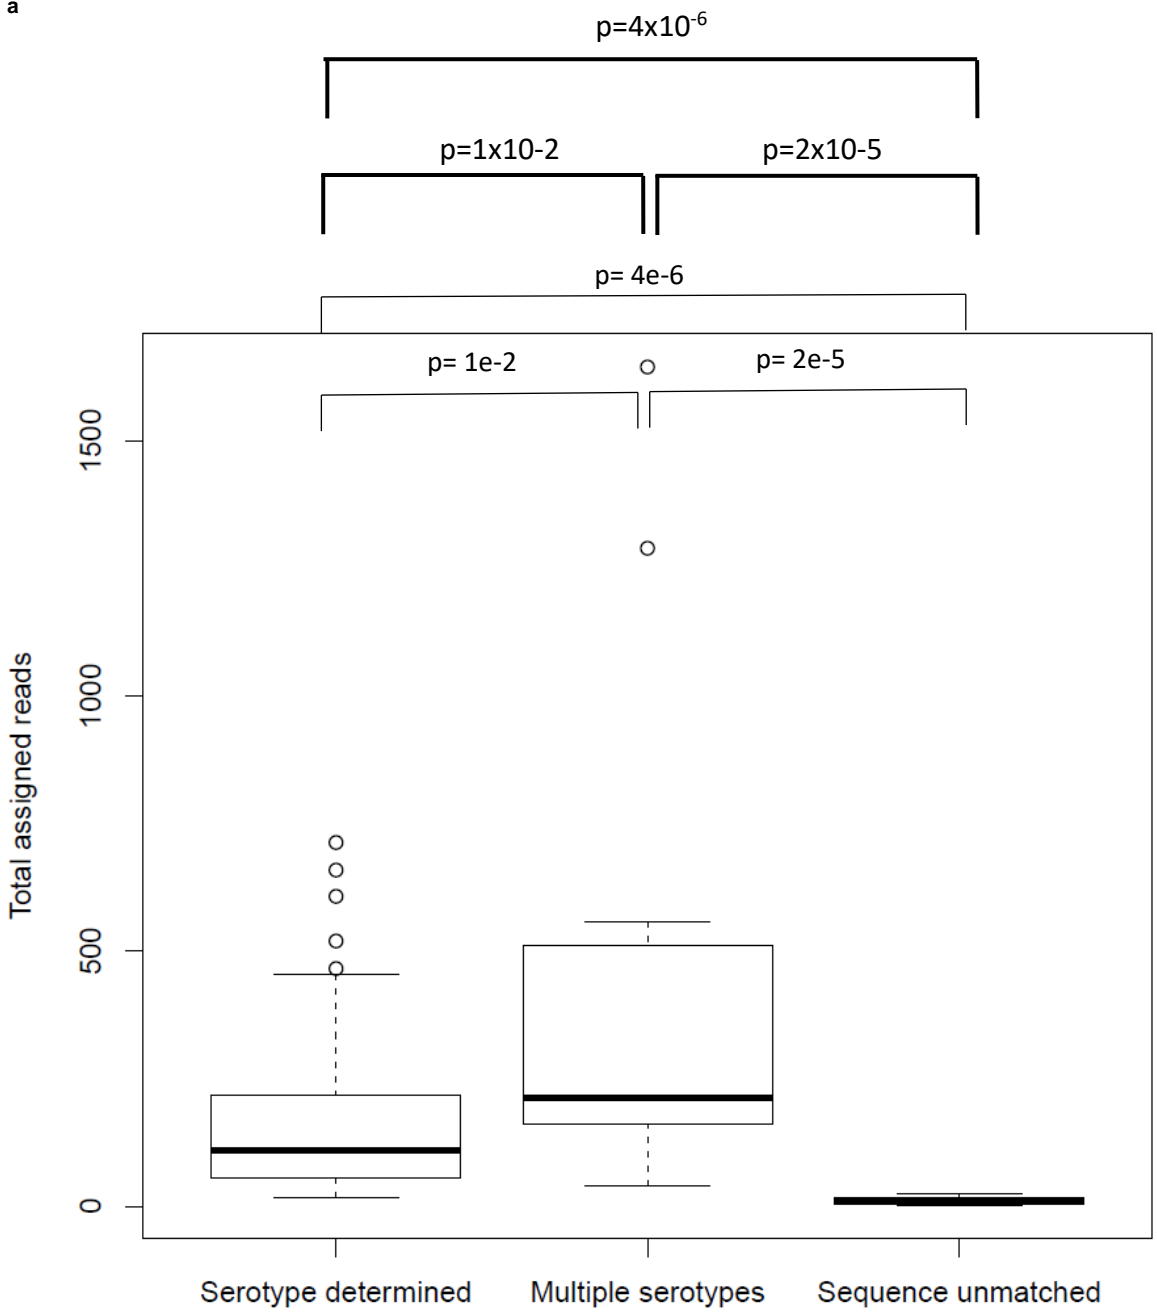

b

| template | D1:D4 | 1:0   | 1:1   | 1:1/10 | 1:1/100 | 1:1/1,000 | 1:1/10,000 |      |
|----------|-------|-------|-------|--------|---------|-----------|------------|------|
| primer   | D1    | 1,825 | 2,550 | 2,575  | 2,250   | 3,350     | 2,850      | (ng) |
| primer   | D4    | 25    | 4,825 | 2,800  | 25      | 25        | 0          |      |

c

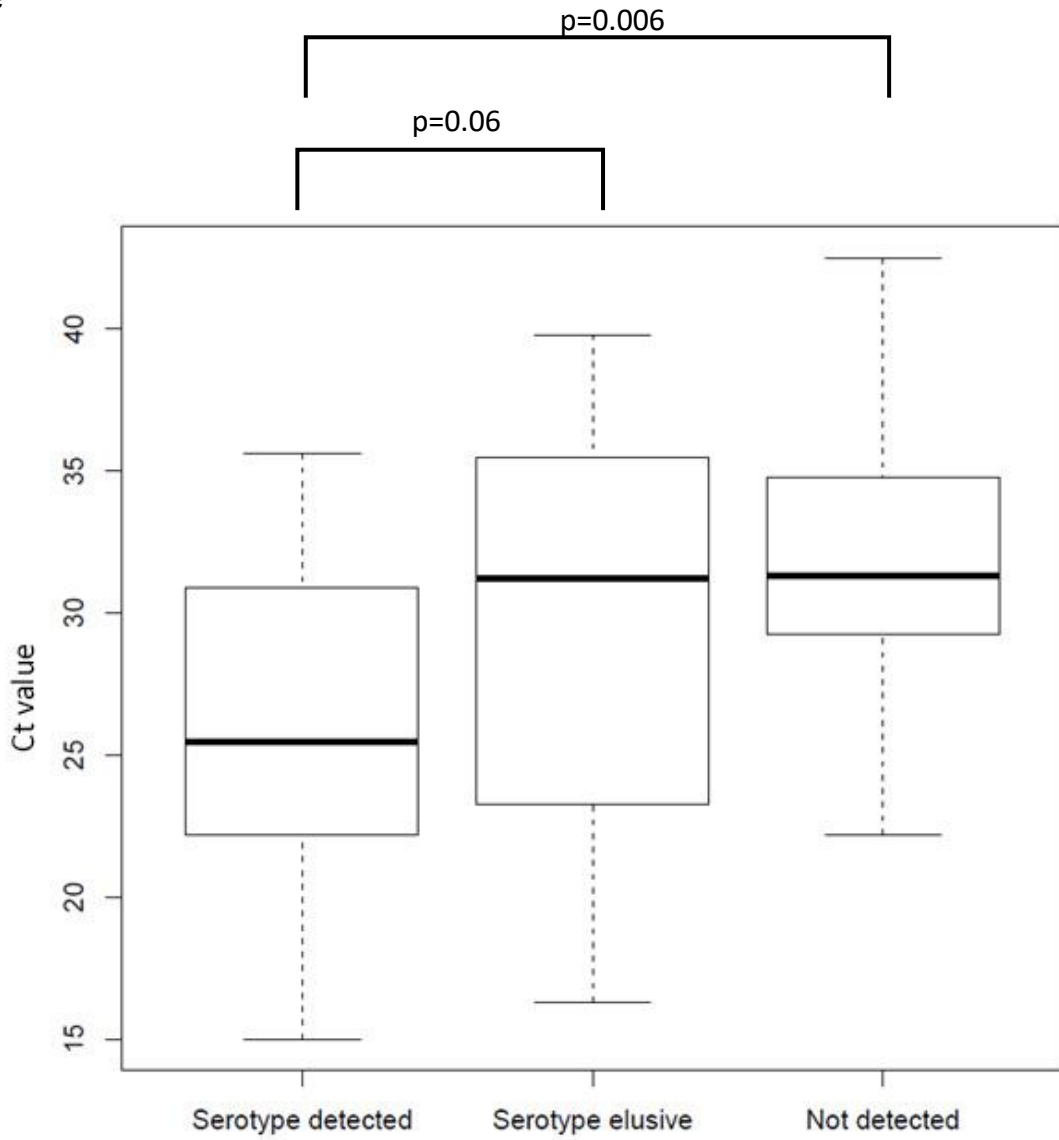

d

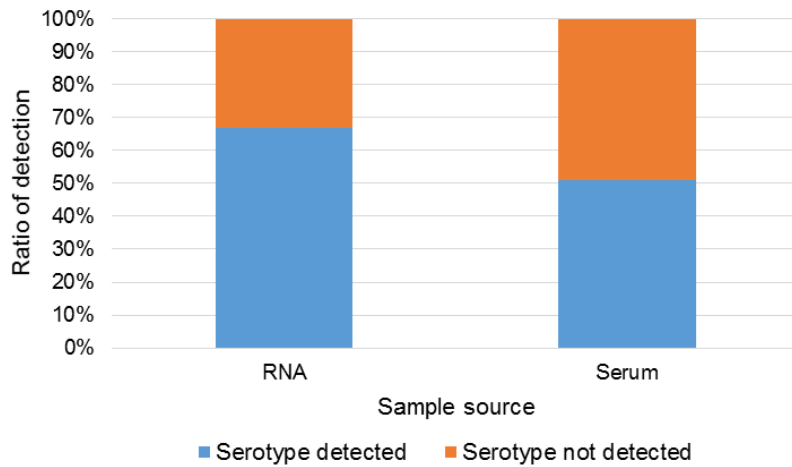

e

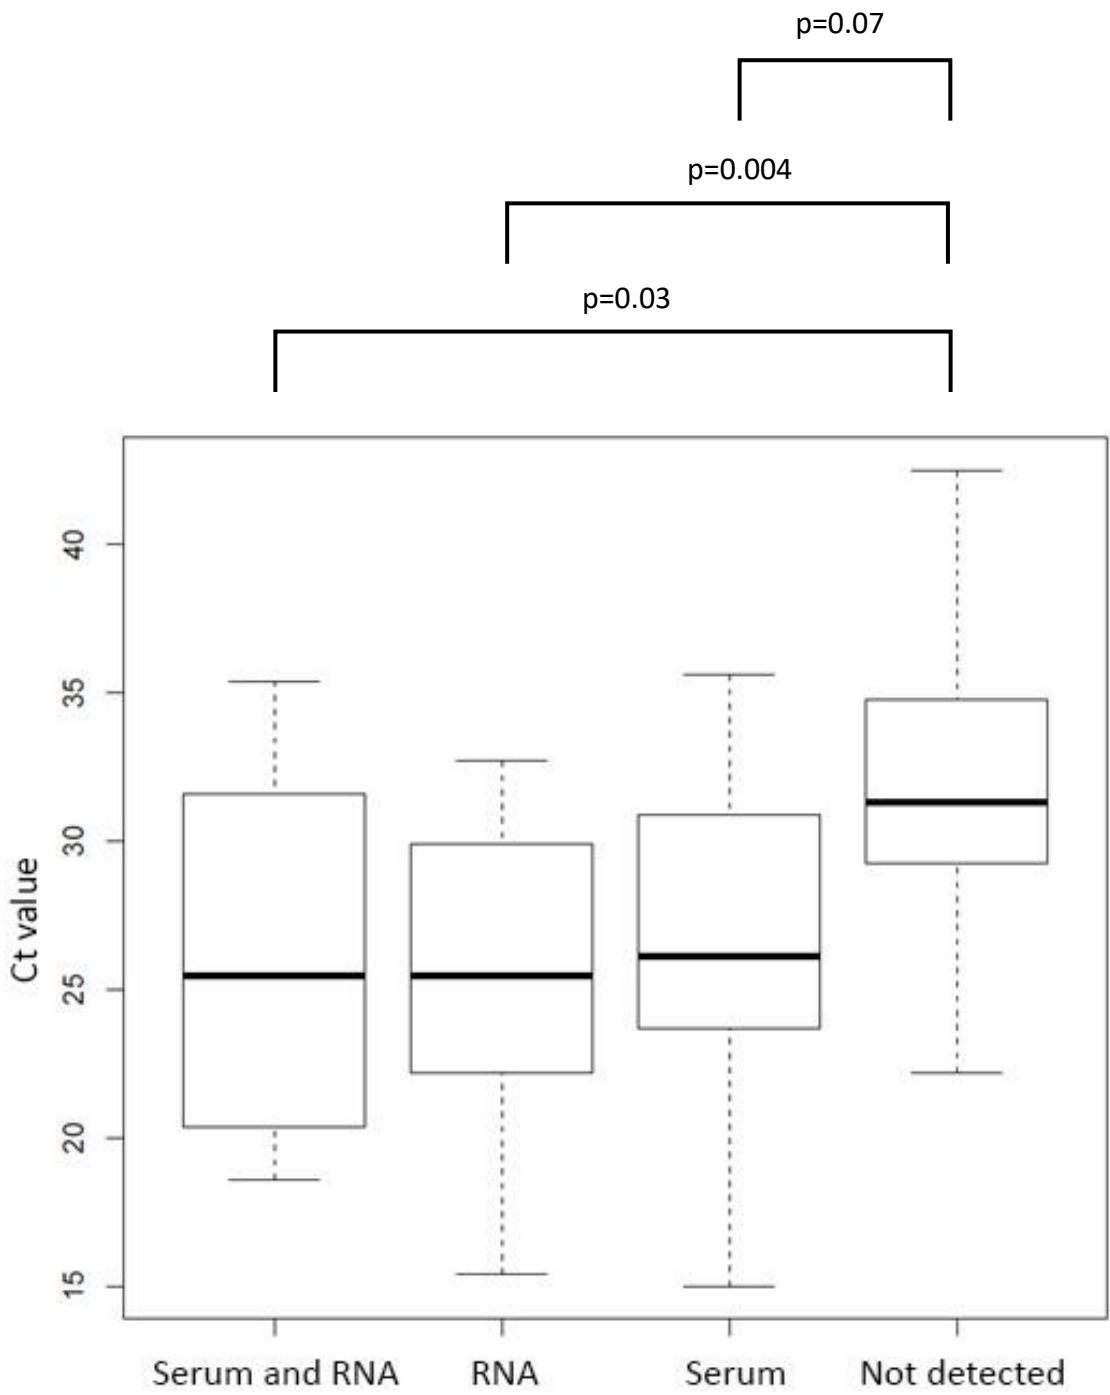

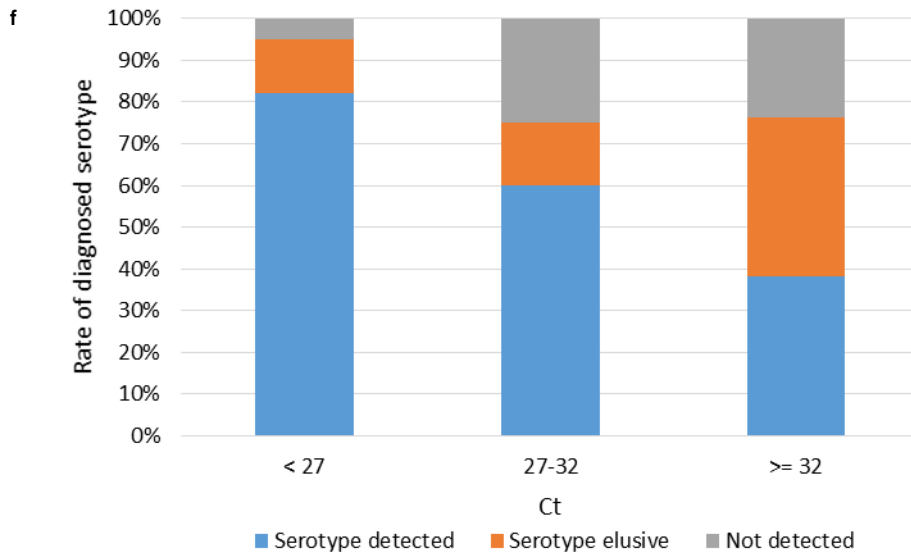

**Figure S8 | Possible causes of the ambiguous detections.**

**a**, The number of sequence reads for the indicated population. The difference in statistical significance was evaluated by the Wilcoxon's signed rank test and shown on the plot. **b**, Non-specific amplification of the contaminated templates. Amounts of the LAMP amplicons using the indicated templates and the primers are shown. Templates were serially mixed with the indicated ratios between the D1 and D4 viral RNA with the total amount of 400 p.f.u.. Note that remnant amount of amplicons of D4 was observed even at the 1/100 dilutions or less. **c**, The detection rate is correlated with viral titer, which is shown here with Ct value from qRT-PCR of DENV E protein. **d**, Detection rate is slightly correlated with sample purity, with purified virus RNA shows slightly better detection rate. **e**, **f**, Detection rate is correlated with viral titer (in this case shown by Ct value), with higher viral titer (lower Ct value) gives a better detection rate.

a

| Sample ID  | Sequencing mode | Category | Diagnosed serotype | Total reads | Total mapped reads | Total reads mapped to the corresponding serotype | Mapped ratio | Average sequence identity |
|------------|-----------------|----------|--------------------|-------------|--------------------|--------------------------------------------------|--------------|---------------------------|
| Control D1 | 2D              | Control  | D1                 | 4,060       | 2,164              | 2,155                                            | 100%         | 77%                       |
| Control D2 | 2D              | Control  | D2                 | 9,260       | 6,719              | 6,617                                            | 98%          | 79%                       |
| Control D3 | 2D              | Control  | D3                 | 9,750       | 7,885              | 7,873                                            | 100%         | 82%                       |
| Control D4 | 2D              | Control  | D4                 | 2,758       | 2,014              | 2,010                                            | 100%         | 78%                       |
| Control D1 | Template        | Control  | D1                 | 22,510      | 1,160              | 1,133                                            | 98%          | 70%                       |
| Control D2 | Template        | Control  | D2                 | 24,079      | 3,623              | 3,375                                            | 93%          | 69%                       |
| Control D3 | Template        | Control  | D3                 | 22,842      | 6,557              | 6,499                                            | 99%          | 71%                       |
| Control D4 | Template        | Control  | D4                 | 5,579       | 967                | 967                                              | 100%         | 70%                       |
| Control D1 | Complement      | Control  | D1                 | 5,943       | 41                 | 41                                               | 100%         | 68%                       |
| Control D2 | Complement      | Control  | D2                 | 11,450      | 577                | 527                                              | 91%          | 69%                       |
| Control D3 | Complement      | Control  | D3                 | 12,436      | 755                | 751                                              | 99%          | 69%                       |
| Control D4 | Complement      | Control  | D4                 | 3,242       | 62                 | 62                                               | 100%         | 70%                       |

b.

| Program    | Sample ID  | Sequencing mode | # of total reads | # of mapped reads | # of reads mapped to the corresponding serotype | Mapped ratio |      |
|------------|------------|-----------------|------------------|-------------------|-------------------------------------------------|--------------|------|
| LAST       | Control D1 | 2D              | 4,060            | 2,164             | 2,155                                           | 100%         |      |
|            | Control D2 | 2D              | 9,260            | 6,719             | 6,617                                           | 98%          |      |
|            | Control D3 | 2D              | 9,750            | 7,885             | 7,873                                           | 100%         |      |
|            | Control D4 | 2D              | 2,758            | 2,014             | 2,010                                           | 100%         |      |
|            | Control D1 | Template        | 22,510           | 1,160             | 1,133                                           | 98%          |      |
|            | Control D2 | Template        | 24,079           | 3,623             | 3,375                                           | 93%          |      |
|            | Control D3 | Template        | 22,842           | 6,557             | 6,499                                           | 99%          |      |
|            | Control D4 | Template        | 5,579            | 967               | 967                                             | 100%         |      |
|            | Control D1 | Complement      | 5,943            | 41                | 41                                              | 100%         |      |
|            | Control D2 | Complement      | 11,450           | 577               | 527                                             | 91%          |      |
|            | Control D3 | Complement      | 12,436           | 755               | 751                                             | 99%          |      |
|            | Control D4 | Complement      | 3,242            | 62                | 62                                              | 100%         |      |
|            | GraphMap   | Control D1      | 2D               | 4,060             | 3,073                                           | 2,606        | 85%  |
|            |            | Control D2      | 2D               | 9,260             | 7,686                                           | 5,293        | 69%  |
|            |            | Control D3      | 2D               | 9,750             | 8,218                                           | 6,911        | 84%  |
|            |            | Control D4      | 2D               | 2,758             | 2,186                                           | 1,796        | 82%  |
| Control D1 |            | Template        | 22,510           | 12,949            | 9,561                                           | 74%          |      |
| Control D2 |            | Template        | 24,079           | 13,763            | 7,880                                           | 57%          |      |
| Control D3 |            | Template        | 22,842           | 15,747            | 11,867                                          | 75%          |      |
| Control D4 |            | Template        | 5,579            | 2,985             | 2,116                                           | 71%          |      |
| Control D1 |            | Complement      | 5,943            | 1,908             | 1,052                                           | 55%          |      |
| Control D2 |            | Complement      | 11,450           | 5,439             | 2,706                                           | 50%          |      |
| Control D3 |            | Complement      | 12,436           | 5,987             | 3,566                                           | 60%          |      |
| Control D4 |            | Complement      | 3,242            | 1,141             | 623                                             | 55%          |      |
| SSEARCH    |            | Control D1      | 2D               | 4,060             | 2,136                                           | 2,115        | 99%  |
|            |            | Control D2      | 2D               | 9,260             | 6,658                                           | 6,511        | 98%  |
|            |            | Control D3      | 2D               | 9,750             | 7,833                                           | 7,800        | 100% |
|            |            | Control D4      | 2D               | 2,758             | 2,047                                           | 2,044        | 100% |
|            | Control D1 | Template        | 22,510           | 3,272             | 3,217                                           | 98%          |      |
|            | Control D2 | Template        | 24,079           | 6,899             | 6,566                                           | 95%          |      |
|            | Control D3 | Template        | 22,842           | 11,050            | 10,921                                          | 99%          |      |
|            | Control D4 | Template        | 5,579            | 1,992             | 1,992                                           | 100%         |      |
|            | Control D1 | Complement      | 5,943            | 189               | 187                                             | 99%          |      |
|            | Control D2 | Complement      | 11,450           | 1,547             | 1,489                                           | 96%          |      |
|            | Control D3 | Complement      | 12,436           | 1,963             | 1,940                                           | 99%          |      |
|            | Control D4 | Complement      | 3,242            | 278               | 278                                             | 100%         |      |

c.

| Control, D1 4,060 |           |           |           |           |           |
|-------------------|-----------|-----------|-----------|-----------|-----------|
| Cut-off (Score)   | #Seq (D1) | #Seq (D2) | #Seq (D3) | #Seq (D4) | %Seq (D1) |
| 200               | 1,502     | 0         | 2         | 0         | 100%      |
| 150               | 2,155     | 0         | 6         | 3         | 100%      |
| 50                | 3,245     | 207       | 298       | 207       | 82%       |

| Clinical, D1 3,156 2015_B24 |           |           |           |           |           |
|-----------------------------|-----------|-----------|-----------|-----------|-----------|
| Cut-off (Score)             | #Seq (D1) | #Seq (D2) | #Seq (D3) | #Seq (D4) | %Seq (D1) |
| 200                         | 407       | 0         | 1         | 0         | 100%      |
| 150                         | 1,087     | 0         | 4         | 0         | 100%      |
| 50                          | 2,607     | 138       | 207       | 125       | 85%       |

| Control, D2 9,260 |           |           |           |           |           |
|-------------------|-----------|-----------|-----------|-----------|-----------|
| Cut-off (Score)   | #Seq (D1) | #Seq (D2) | #Seq (D3) | #Seq (D4) | %Seq (D2) |
| 200               | 1         | 5,898     | 6         | 39        | 99%       |
| 150               | 11        | 6,617     | 12        | 79        | 98%       |
| 50                | 413       | 7,556     | 419       | 713       | 83%       |

| Clinical, D2 4,680 2015_B49 |           |           |           |           |           |
|-----------------------------|-----------|-----------|-----------|-----------|-----------|
| Cut-off (Score)             | #Seq (D1) | #Seq (D2) | #Seq (D3) | #Seq (D4) | %Seq (D2) |
| 200                         | 2         | 3,088     | 3         | 25        | 99%       |
| 150                         | 9         | 3,534     | 4         | 63        | 98%       |
| 50                          | 185       | 3,931     | 134       | 378       | 85%       |

| Control, D3 9,750 |           |           |           |           |           |
|-------------------|-----------|-----------|-----------|-----------|-----------|
| Cut-off (Score)   | #Seq (D1) | #Seq (D2) | #Seq (D3) | #Seq (D4) | %Seq (D3) |
| 200               | 4         | 0         | 6,965     | 0         | 100%      |
| 150               | 11        | 1         | 7,873     | 0         | 100%      |
| 50                | 251       | 256       | 8,929     | 221       | 92%       |

| Clinical, D3 5,598 2015_B54 |           |           |           |           |           |
|-----------------------------|-----------|-----------|-----------|-----------|-----------|
| Cut-off (Score)             | #Seq (D1) | #Seq (D2) | #Seq (D3) | #Seq (D4) | %Seq (D3) |
| 200                         | 0         | 0         | 2,168     | 0         | 100%      |
| 150                         | 11        | 0         | 2,666     | 0         | 100%      |
| 50                          | 512       | 537       | 3,960     | 421       | 73%       |

| Control, D4 2,758 |           |           |           |           |           |
|-------------------|-----------|-----------|-----------|-----------|-----------|
| Cut-off (Score)   | #Seq (D1) | #Seq (D2) | #Seq (D3) | #Seq (D4) | %Seq (D4) |
| 200               | 0         | 0         | 0         | 1,643     | 100%      |
| 150               | 0         | 0         | 4         | 2,010     | 100%      |
| 50                | 90        | 68        | 108       | 2,464     | 90%       |

| Clinical, D4 4,220 2015_B17 |           |           |           |           |           |
|-----------------------------|-----------|-----------|-----------|-----------|-----------|
| Cut-off (Score)             | #Seq (D1) | #Seq (D2) | #Seq (D3) | #Seq (D4) | %Seq (D4) |
| 200                         | 0         | 0         | 0         | 2,341     | 100%      |
| 150                         | 0         | 1         | 3         | 2,842     | 100%      |
| 50                          | 208       | 175       | 228       | 3,533     | 85%       |

**Table S1 | Statistics of the “2D”, “template” and “complement”.**

a. The statistics of MinION sequencing showed 5,000-20,000 reads were obtained for “template” and “complement” and 2,500-10,000 reads for “2D”. Approximately 91-100% reads were mapped to the respective serotype reference. b The statistics of analysis with GraphMap and SSEARCH compared to LAST. c, The statistics of various LAST score parameters with control and clinical samples mapped to their respective serotype.

| Sample ID  | Primer set | Den1 | Den2 | Den3 | Den4 |
|------------|------------|------|------|------|------|
| Control D1 | D1         |      | 144  | 613  | 150  |
| Control D2 | D2         | 275  |      | 245  | 1034 |
| Control D3 | D3         | 1880 | 756  |      | 2925 |
| Control D4 | D4         | 24   | 44   | 29   |      |
| B24        | D1         |      | 31   | 135  | 23   |
| B49        | D2         | 205  |      | 168  | 428  |
| B54        | D3         | 478  | 51   |      | 966  |
| B17        | D4         | 46   | 98   | 66   |      |
| B25        | D1         |      | 67   | 251  | 55   |
| B03        | D1         |      | 34   | 158  | 27   |
| 11         | D1         |      | 56   | 187  | 39   |
| 01         | D1         |      | 4    | 35   | 5    |
| 21         | D1         |      | 3    | 49   | 1    |
| 17         | D1         |      | 23   | 136  | 18   |
| B28        | D3         | 213  | 48   |      | 411  |

**Table S2 | The results from serotyping that exclude the primer sites.**

The number of sequences that showed base matches to the diagnosed serotype for all of the positions that are different between the diagnosed serotypes and indicated serotypes. Note that no sequences matched at all the positions of the candidate serotypes when compared to the diagnosed serotypes.



**a.**

| Sample ID  | Sequencing mode | Category | Diagnosed serotype | Total reads | Total mapped reads | Total reads mapped to the corresponding serotype | Mapped ratio | Average sequence identity |
|------------|-----------------|----------|--------------------|-------------|--------------------|--------------------------------------------------|--------------|---------------------------|
| Control D1 | 2D              | Control  | D1                 | 650,232     | 622,563            | 622,325                                          | 100%         | 87%                       |
| Control D2 | 2D              | Control  | D2                 | 296,751     | 288,743            | 287,845                                          | 99%          | 86%                       |
| Control D3 | 2D              | Control  | D3                 | 129,955     | 126,193            | 126,119                                          | 100%         | 89%                       |
| Control D4 | 2D              | Control  | D4                 | 133,968     | 129,643            | 129,635                                          | 100%         | 86%                       |
| Control D1 | Template        | Control  | D1                 | 973,069     | 868,796            | 867,602                                          | 100%         | 82%                       |
| Control D2 | Template        | Control  | D2                 | 498,409     | 441,176            | 437,450                                          | 99%          | 80%                       |
| Control D3 | Template        | Control  | D3                 | 200,498     | 178,831            | 179,391                                          | 100%         | 84%                       |
| Control D4 | Template        | Control  | D4                 | 223,864     | 184,034            | 184,008                                          | 100%         | 80%                       |
| Control D1 | Complement      | Control  | D1                 | 703,513     | 587,770            | 586,571                                          | 100%         | 80%                       |
| Control D2 | Complement      | Control  | D2                 | 331,234     | 281,245            | 276,948                                          | 98%          | 78%                       |
| Control D3 | Complement      | Control  | D3                 | 144,910     | 124,163            | 123,572                                          | 100%         | 82%                       |
| Control D4 | Complement      | Control  | D4                 | 160,309     | 126,841            | 126,825                                          | 100%         | 79%                       |

**b.**

| Sample ID     | Sequencing mode | Total reads | Total mapped reads (score=150) | Total reads mapped to the corresponding serotype (score=150, mismap=1) |         |         |         | Ratio |
|---------------|-----------------|-------------|--------------------------------|------------------------------------------------------------------------|---------|---------|---------|-------|
|               |                 |             |                                | DENV1                                                                  | DENV2   | DENV3   | DENV4   |       |
| Control DENV1 | 2D              | 650,232     | 622,563                        | 622,325                                                                | 5       | 37      | 196     | 100%  |
| Control DENV2 | 2D              | 296,751     | 288,743                        | 20                                                                     | 287,845 | 140     | 738     | 100%  |
| Control DENV3 | 2D              | 129,955     | 126,193                        | 67                                                                     | 4       | 126,119 | 3       | 100%  |
| Control DENV4 | 2D              | 133,968     | 129,643                        | 0                                                                      | 2       | 6       | 129,635 | 100%  |

**c.**

| Sample ID | Sequencing mode | Category                | Diagnosed serotype | Total reads | Number of mapped reads | Number of reads mapped to the corresponding serotype | Percent ratio | Average sequence identity |
|-----------|-----------------|-------------------------|--------------------|-------------|------------------------|------------------------------------------------------|---------------|---------------------------|
| B24       | 2D              | Clinical representative | DENV1              | 20,854      | 18,025                 | 18,022*                                              | 100%          | 71%*                      |
| B49       | 2D              | Clinical representative | DENV2              | 274,669     | 241,189                | 237,421                                              | 98%           | 81%                       |
| B54       | 2D              | Clinical representative | DENV3              | 283,144     | 264,987                | 264,666                                              | 100%          | 88%                       |
| B17       | 2D              | Clinical representative | DENV4              | 263,889     | 230,336                | 230,317                                              | 100%          | 80%                       |

**Table S3 | Sequencing result of control samples obtained by newer version flow cell.**

**a.** Newer version of flow cell shows higher total reads yield and sequence identity when sequencing control samples. **b.** Almost all of the "2D" reads were successfully mapped to the respective serotype. **c.** Sequence of representative clinical samples also shows better statistics to almost all samples. One sample (shown by asterisk) has worse sequence identity compared to the former version. This is due to unsuccessful LAMP amplification.

**a**

| Category | Sample | Total aligned match | Match     | Insertion | Deletion | Mismatch | % match | % insertion | % deletion | % mismatch |
|----------|--------|---------------------|-----------|-----------|----------|----------|---------|-------------|------------|------------|
| Control  | D1     | 236,384             | 181,778   | 4,324     | 21,899   | 28,383   | 77%     | 2%          | 9%         | 12%        |
| Control  | D2     | 916,128             | 720,072   | 24,809    | 57,943   | 113,304  | 79%     | 3%          | 6%         | 12%        |
| Control  | D3     | 981,318             | 801,880   | 33,231    | 45,415   | 100,792  | 82%     | 3%          | 5%         | 10%        |
| Control  | D4     | 258,734             | 202,995   | 8,876     | 12,347   | 34,516   | 78%     | 3%          | 5%         | 13%        |
| Total    |        | 2,392,564           | 1,906,725 | 71,240    | 137,604  | 276,995  | 80%     | 3%          | 6%         | 12%        |

**b**

Reference genome

|   | A      | C      | G      | T      |
|---|--------|--------|--------|--------|
| A |        | 28,958 | 31,650 | 11,003 |
| C | 21,260 |        | 25,959 | 17,772 |
| G | 29,528 | 25,354 |        | 10,816 |
| T | 15,730 | 33,672 | 25,293 |        |
| - | 36,082 | 45,765 | 41,204 | 14,553 |

MinION reads

**Table S4 | Patterns of possible sequence errors in the sequence reads using the control samples.**  
**a**, The overall frequency of the mismatch pattern. **b**, The detailed base substitution patterns.

**a**

| Sample name | Age | Sex | Clinical Evidence | RT-PCR | MinION |
|-------------|-----|-----|-------------------|--------|--------|
| Healthy_01  | 40  | F   | NA                | ND     | ND     |
| Healthy_02  | 66  | M   | NA                | ND     | ND     |
| Healthy_03  | 66  | F   | NA                | ND     | ND     |
| Healthy_04  | 70  | F   | NA                | ND     | ND     |
| Healthy_05  | 33  | F   | NA                | ND     | ND     |
| Healthy_06  | 77  | M   | NA                | ND     | ND     |
| Healthy_08  | 20  | M   | NA                | ND     | ND     |
| Healthy_09  | 66  | M   | NA                | ND     | ND     |
| Healthy_10  | 17  | M   | NA                | ND     | ND     |
| Healthy_11  | 10  | F   | NA                | ND     | ND     |
| Healthy_12  | 66  | F   | NA                | ND     | ND     |
| Healthy_13  | 10  | M   | NA                | ND     | ND     |
| Healthy_14  | 37  | M   | NA                | ND     | ND     |
| Healthy_15  | 37  | F   | NA                | ND     | ND     |
| Healthy_16  | 67  | M   | NA                | ND     | ND     |
| Healthy_17  | 75  | M   | NA                | ND     | ND     |
| Healthy_18  | 25  | M   | NA                | ND     | ND     |
| Healthy_19  | 30  | M   | NA                | ND     | ND     |
| Healthy_20  | 59  | M   | NA                | ND     | ND     |
| Kashiwa_01  | 45  | M   | NA                | ND     | ND     |
| Kashiwa_02  | 42  | F   | NA                | ND     | ND     |
| Kashiwa_03  | 26  | F   | NA                | ND     | ND     |
| Kashiwa_04  | 33  | F   | NA                | ND     | ND     |
| Kashiwa_05  | 33  | F   | NA                | ND     | ND     |
| Kashiwa_06  | 33  | F   | NA                | ND     | ND     |
| Kashiwa_07  | 42  | F   | NA                | ND     | ND     |
| Kashiwa_08  | 38  | F   | NA                | ND     | ND     |
| Kashiwa_09  | 34  | M   | NA                | ND     | ND     |
| Kashiwa_10  | 58  | F   | NA                | ND     | ND     |
| Kashiwa_11  | 23  | M   | NA                | ND     | ND     |
| Kashiwa_12  | 48  | F   | NA                | ND     | ND     |
| Kashiwa_13  | 41  | M   | NA                | ND     | ND     |
| Kashiwa_14  | 29  | F   | NA                | ND     | ND     |

**b**

| Sample ID | RT-PCR | MinION |
|-----------|--------|--------|
| B24       | D1     | D1     |
| B49       | D2     | D2     |
| B54       | D3     | D3     |
| B17       | D4     | D4     |
| 01        | ND     | D1     |
| 11        | ND     | D1     |
| 17        | NA     | D1     |
| 21        | ND     | D1     |
| B03       | D1     | D1     |
| B25       | D1     | D1     |
| B28       | D3     | D3     |

**c**

| Sample origin | Total samples | RT-PCR   |              | MinION<br>(same sample as RT-PCR) |              | Serotype<br>consistent with<br>RT-PCR |
|---------------|---------------|----------|--------------|-----------------------------------|--------------|---------------------------------------|
|               |               | Detected | Not detected | Detected                          | Not detected |                                       |
| Indonesia     | 11            | 7        | 4            | 11                                | 0            | 7                                     |
| Thai          | 12            | 12       | 0            | 12                                | 0            | 12                                    |
| Vietnam       | 26            | 24       | 2            | 26                                | 0            | 24                                    |

d

| Sample ID | Diagnosed serotype | Total aligned reads | Match     | Insertion | Deletion | Mismatch | % match | % ins | % del | % mismatch |
|-----------|--------------------|---------------------|-----------|-----------|----------|----------|---------|-------|-------|------------|
| B24       | D1                 | 101,438             | 75,453    | 7,708     | 6,984    | 11,293   | 74%     | 8%    | 7%    | 11%        |
| B49       | D2                 | 477,863             | 371,774   | 12,780    | 29,674   | 63,635   | 78%     | 3%    | 6%    | 13%        |
| B54       | D3                 | 336,605             | 269,114   | 11,940    | 18,798   | 36,753   | 80%     | 4%    | 6%    | 11%        |
| B17       | D4                 | 419,953             | 319,287   | 16,861    | 22,274   | 61,531   | 76%     | 4%    | 5%    | 15%        |
| 1         | D1                 | 14,465              | 11,080    | 328       | 1,302    | 1,755    | 77%     | 2%    | 9%    | 12%        |
| 11        | D1                 | 60,949              | 47,116    | 1,204     | 5,704    | 6,925    | 77%     | 2%    | 9%    | 11%        |
| 17        | D1                 | 43,352              | 33,500    | 979       | 3,666    | 5,207    | 77%     | 2%    | 8%    | 12%        |
| 21        | D1                 | 18,774              | 14,337    | 514       | 1,647    | 2,276    | 76%     | 3%    | 9%    | 12%        |
| B03       | D1                 | 40,603              | 31,338    | 1,210     | 2,999    | 5,056    | 77%     | 3%    | 7%    | 12%        |
| B25       | D1                 | 63,718              | 50,075    | 1,570     | 4,529    | 7,544    | 79%     | 2%    | 7%    | 12%        |
| B28       | D3                 | 114,623             | 92,477    | 4,374     | 5,576    | 12,196   | 81%     | 4%    | 5%    | 11%        |
| Total     |                    | 1,692,343           | 1,315,551 | 59,468    | 103,153  | 214,171  | 78%     | 4%    | 6%    | 13%        |

e

| Sample | Serotype | SNP called by MinION                               | SNP called by Illumina                             |
|--------|----------|----------------------------------------------------|----------------------------------------------------|
| B24    | D1       | Den1:10553:G:A<br>Den2:10553:C:T                   | Den1:10581:C:G                                     |
| B49    | D2       | Den2:10555:A:G<br>Den2:10560:A:G<br>Den2:10573:G:A | Den2:10555:A:G<br>Den2:10560:A:G<br>Den2:10573:G:A |
| B54    | D3       | Den3:10391:T:C                                     | Den3:10391:T:C                                     |
| B17    | D4       | Not detected                                       | Den4:10403:C:T<br>Den4:10415:T:C                   |
| 01     | D1       | Not detected                                       | Den1:10581:C:G                                     |
| 11     | D1       | Not detected                                       | Den1:10581:C:G                                     |
| 17     | D1       | Not detected                                       | Not detected                                       |
| 21     | D1       | Not detected                                       | Not detected                                       |
| B03    | D1       | Den1:10581:C:G                                     | Not analyzed                                       |
| B25    | D1       | Den1:10581:C:G                                     | Den1:10581:C:G                                     |
| B28    | D3       | Den3:10391:T:C                                     | Den3:10391:T:C                                     |

f

| Sample ID | Sequencing mode | Category            | Diagnosed serotype | # total reads | # mapped reads | # of read mapped to the corresponding serotype | Mapped ratio | Average sequence identity |
|-----------|-----------------|---------------------|--------------------|---------------|----------------|------------------------------------------------|--------------|---------------------------|
| 021       | 2D              | Clinical Indonesian | D4                 | 26            | 11             | 11                                             | 100%         | 72%                       |
| 021       | Template        | Clinical Indonesian | D4                 | 372           | 8              | 8                                              | 100%         | 67%                       |
| 021       | Complement      | Clinical Indonesian | D4                 | 66            | 0              | 0                                              | -            | -                         |

g

|                       | Illumina |     |           |     |       | RT-PCR  |     |           |     |              |      |       |
|-----------------------|----------|-----|-----------|-----|-------|---------|-----|-----------|-----|--------------|------|-------|
|                       | Matched  | %   | Unmatched | %   | Total | Matched | %   | Unmatched | %   | Not detected | %    | Total |
| Serotype determined   | 43       | 96% | 2         | 4%  | 45    | 10      | 37% | 1         | 4%  | 16           | 59%  | 27    |
| Multiple serotype     | 6        | 86% | 1         | 14% | 7     | 0       | 0%  | 2         | 33% | 4            | 67%  | 6     |
| Serotype undetermined | NA       |     | NA        |     | NA    | 0       | 0%  | 0         | 0%  | 2            | 100% | 2     |
| Not detected          | NA       |     | NA        |     | NA    | 0       | 0%  | 0         | 0%  | 8            | 100% | 8     |
| Total                 | 49       | 94% | 3         | 6%  | 52    | 10      | 23% | 3         | 7%  | 30           | 70%  | 43    |

**Table S5 | Statistics of the MinION sequencing for clinical samples.**

**a**, Results of the analysis using healthy samples, from Indonesia (labeled as Healthy) and from Japan (labeled as Kashiwa). **b, c**, RT-PCR validation of the MinION results shows that MinION can detect dengue serotype when RT-PCR fails to detect the serotype. **d**, Patterns of the putative sequence errors are shown. **e**, The positions and patterns of the SNVs and their validations for the non-multiplexed samples. **f**, Data from one of the field-analyzed samples are similar with those of laboratory-analyzed. **g**, Illumina and RT-PCR validation of MinION results for the multiplexed samples. NA: Not analyzed; ND: Not detected.

**a**

|            |                  |                                                |
|------------|------------------|------------------------------------------------|
| for type 1 | F1P              | GCTGCGTTGTGCTTGGGAGGTTTTCTGTACGCATGGGGTAGC     |
|            | B1P              | CCCAACACCAGGGGAAGCTGTTTTTTTGTGTTGTGCGGGGG      |
|            | FLP              | CTCCCTAACCACTAGTC                              |
|            | BLP              | GGTGGTAAGGACTAGAGG                             |
|            | F3               | GAGGCTGCAACCACTGGAA                            |
| for type 2 | F1P              | TTGGGCCCCCATTTGTGCTGTTTGTAGTGCAGCGGTTAGAGG     |
|            | B1P              | GGTTAGAGGAGACCCCCCAATTTTGGAGACAGCAGGATCTCTGG   |
|            | FLP              | GATCTGTAGGGAGGGG                               |
|            | BLP              | GCATATTGACCCCTGGGA                             |
|            | F3               | TGGAAAGCTGTACCCATGG                            |
| for type 3 | F1P              | TGGCCTTTGGGCCCTGACTTCTTTTTTGAAGAAGCTGTGCAGCCTG |
|            | B1P              | CTGTAGCTCCGCTCGTGGGATTTCTAGTCTGCTACACCGTGC     |
|            | FLP              | CCTTGGACGGGGCT                                 |
|            | BLP              | GGAGGCTGCAAAACCGTG                             |
|            | F3               | GCCACCTTAAGCCACAGTA                            |
| for type 4 | F1P              | TGGGAATTAACCGCTCCCGTTTTTCCACGGCTTGAGCAAAACC    |
|            | B1P              | GGTTAGAGGAGACCCCTCCCTTTTTCAGCTTCCCTCGGCTTCG    |
|            | FLP              | GGGGAGCTACAGGCAG                               |
|            | BLP              | TCACCAACA AAAAGCAG                             |
|            | F3               | CTATTGAAGTCAGGCCAC                             |
| B3         | ACCTCTAGTCTCCACC |                                                |

**b**

|            |              |                                                                        |
|------------|--------------|------------------------------------------------------------------------|
| for type 1 | D1_F1P_ind1  | GCTGCGTTGTGCTTGGGAGGAAGAAGTTGTCGGTGTCTTTGCTGCTACCGCATGGGGTAGC          |
|            | D1_F1P_ind2  | GCTGCGTTGTGCTTGGGAGGTGCAATCCGTTTTGTAGTGTGCTGCTGTACGCAATGGGGTAGC        |
|            | D1_F1P_ind3  | GCTGCGTTGTGCTTGGGAGGAGTCTGTGTCGCCAGTACCAGGCCTGTACGCAATGGGGTAGC         |
|            | D1_F1P_ind4  | GCTGCGTTGTGCTTGGGAGGTTCCGATTCTATCGTGTTCCTACTGTACGCAATGGGGTAGC          |
|            | D1_F1P_ind5  | GCTGCGTTGTGCTTGGGAGGTTGCCAGGTTTTGTAACTTCTGTACGCAATGGGGTAGC             |
|            | D1_F1P_ind6  | GCTGCGTTGTGCTTGGGAGGTTCTCGCAAAAGGCAGAAAGTAGTCTGTACGCAATGGGGTAGC        |
|            | D1_F1P_ind7  | GCTGCGTTGTGCTTGGGAGGTTTACCCTGGGAATGAATCCTTGTACGCAATGGGGTAGC            |
|            | D1_F1P_ind8  | GCTGCGTTGTGCTTGGGAGGTTACAGGAAACAACAAGTACGCTGTACGCAATGGGGTAGC           |
|            | D1_F1P_ind9  | GCTGCGTTGTGCTTGGGAGGAACAGGCACACCGAGTCTGGTCTGTACGCAATGGGGTAGC           |
|            | D1_F1P_ind10 | GCTGCGTTGTGCTTGGGAGGAAGCCTTGAACCTTTGCTCTCTGCTACGCAATGGGGTAGC           |
| for type 2 | D2_F1P_ind1  | TTGGGCCCCCATTTGTGCTGAAGAAGTTGTCGGTGTCTTTGTGAGTGGACTACGGGTTAGAGG        |
|            | D2_F1P_ind2  | TTGGGCCCCCATTTGTGCTGTCGATCCCGTTGTAGTGTGCTGTAGTGGACTACGGGTTAGAGG        |
|            | D2_F1P_ind3  | TTGGGCCCCCATTTGTGCTGGAGTCTTGTGCCCACTACCAGGAGTGGACTACGGGTTAGAGG         |
|            | D2_F1P_ind4  | TTGGGCCCCCATTTGTGCTGTTCCGATTCTATCGTGTTCCTAAGTGGACTACGGGTTAGAGG         |
|            | D2_F1P_ind5  | TTGGGCCCCCATTTGTGCTGTTGCCAGGGTTTGTGTAACTTAGTGGACTACGGGTTAGAGG          |
|            | D2_F1P_ind6  | TTGGGCCCCCATTTGTGCTGTTCTCGCAAAAGGCAGAAAGTAGTGGACTACGGGTTAGAGG          |
|            | D2_F1P_ind7  | TTGGGCCCCCATTTGTGCTGTTACCGTGGGAATGAATCCTTAGTGGACTACGGGTTAGAGG          |
|            | D2_F1P_ind8  | TTGGGCCCCCATTTGTGCTGTTACAGGAAACAACAAGTACGCTGTAGTGGACTACGGGTTAGAGG      |
|            | D2_F1P_ind9  | TTGGGCCCCCATTTGTGCTGAACTAGBCACACGAGTCTGGTGTAGTGGACTACGGGTTAGAGG        |
|            | D2_F1P_ind10 | TTGGGCCCCCATTTGTGCTGAAGCCTTGAACCTTTGCTCTCTGCTACGTSACTACGGGTTAGAGG      |
| for type 3 | D3_F1P_ind1  | TGGCCTTTGGGCCCTGACTTCAAGAAGTTGTCGGTGTCTTTGTAAGAAGCTGTGCAGCCTG          |
|            | D3_F1P_ind2  | TGGCCTTTGGGCCCTGACTTCCGATCCCGTTGTAGTGTGCTGCTGTGAAGAAGCTGTGCAGCCTG      |
|            | D3_F1P_ind3  | TGGCCTTTGGGCCCTGACTTCCGATCCCGTTGTAGTGTGTCACAGTACCAGGAAAGAGCTGTGCAGCCTG |
|            | D3_F1P_ind4  | TGGCCTTTGGGCCCTGACTTCTTCCGATCTATCGTGTTCCTAAGAAGCTGTGCAGCCTG            |
|            | D3_F1P_ind5  | TGGCCTTTGGGCCCTGACTTCTTCCGAGGGTTTTGTAACTTAGTGGACTACGGGTTAGAGG          |
|            | D3_F1P_ind6  | TGGCCTTTGGGCCCTGACTTCTTCCGAAAGGCAGAAAGTAGTGGACTACGGGTTAGAGG            |
|            | D3_F1P_ind7  | TGGCCTTTGGGCCCTGACTTCTTCCGAAATGAATCCTTAGTGGACTACGGGTTAGAGG             |
|            | D3_F1P_ind8  | TGGCCTTTGGGCCCTGACTTCTTCCAGGAAACAACAAGTACGCTAAGAAGCTGTGCAGCCTG         |
|            | D3_F1P_ind9  | TGGCCTTTGGGCCCTGACTTCAACTAGGCACAGCAGTCTTGGTTGAAGAAGCTGTGCAGCCTG        |
|            | D3_F1P_ind10 | TGGCCTTTGGGCCCTGACTTCAAGCCTTGAACCTTTGCTCTCTGCTACGTSACTACGGGTTAGAGG     |
| for type 4 | D4_F1P_ind1  | TGGGAATTAACCGCTCCCGAAGAAGTTGTCGGTGTCTTTGTCACCGCTTGAGCAAAACC            |
|            | D4_F1P_ind2  | TGGGAATTAACCGCTCCCGTCCGATCCCGTTGTAGTGTGCTGCCACGGCTTGAGCAAAACC          |
|            | D4_F1P_ind3  | TGGGAATTAACCGCTCCCGGAGCTTGTGTCACAGTACCAGGCCACGGCTTGAGCAAAACC           |
|            | D4_F1P_ind4  | TGGGAATTAACCGCTCCCGTCCGATCTATCGTGTTCCTACCACGGCTTGAGCAAAACC             |
|            | D4_F1P_ind5  | TGGGAATTAACCGCTCCCGTTGTCAGGAAACAACAAGTACGCTTGAGCAAAACC                 |
|            | D4_F1P_ind6  | TGGGAATTAACCGCTCCCGTCTCGCAAAAGGCAGAAAGTAGTCCACGGCTTGAGCAAAACC          |
|            | D4_F1P_ind7  | TGGGAATTAACCGCTCCCGGTTTACCCTGGGAATGAATCCTTCCACGGCTTGAGCAAAACC          |
|            | D4_F1P_ind8  | TGGGAATTAACCGCTCCCGTCCAGGAAACAACAAGTACGCTTGAGCAAAACC                   |
|            | D4_F1P_ind9  | TGGGAATTAACCGCTCCCGAAGTACGCAACAGCAGTCTGGTCCACGGCTTGAGCAAAACC           |
|            | D4_F1P_ind10 | TGGGAATTAACCGCTCCCGAGGCTTGAACCTTTGCTCTCTCCACGGCTTGAGCAAAACC            |

**c**

|            |       |                       |
|------------|-------|-----------------------|
| for type 1 | D1S   | GGACTGCGTATGGAGTTTGG  |
|            | D1C   | ATGCGTGTGGCCATAATCAT  |
| for type 2 | D2Sv3 | AORTTYGCTGCAAAACACTCC |
|            | D2Cv3 | GTGTACTTTRATTTCCTTG   |
| for type 3 | D3S   | GTGCTTACACAGCCCTAATT  |
|            | D3C   | TGCAATCTCCAAGCCCTG    |
| for type 4 | D4S   | CGATTAGGCTGTGTGTTT    |
|            | D4C   | CTTACTCTGCTCACTTCT    |

**Table S6 | Primers used for the LAMP amplification.** Primers without barcoding oligos (a), primers containing barcoding oligos for multiplexing (b), primers for RT-PCR validation (c).

**a**

| Run ID | # 2D total reads | # total assigned reads | % assigned | Index 1 | Index 2 | Index 3 | Index 4 | Index 5 | Index 6 | Index 7 | Index 8 | Index 9 | Index 10 |
|--------|------------------|------------------------|------------|---------|---------|---------|---------|---------|---------|---------|---------|---------|----------|
| 1000   | 3,965            | 2,597                  | 65%        | ND      | 334     | 329     | 328     | 70      | 221     | 167     | 397     | 332     | 419      |
| 1001   | 927              | 587                    | 63%        | 72      | 69      | 67      | 105     | ND      | 72      | 40      | 33      | 19      | 110      |
| 1002   | 2,777            | 1,773                  | 64%        | 258     | 484     | 144     | 145     | 44      | 204     | 120     | 0       | 159     | 215      |
| 1003   | 2,599            | 1,541                  | 59%        | 82      | 215     | 87      | 115     | 87      | 270     | 204     | 50      | 110     | 321      |
| 1004   | 440              | 280                    | 64%        | 69      | ND      | 5       | 30      | 31      | 24      | 33      | 27      | 23      | 38       |
| 1005   | 1,480            | 846                    | 57%        | 182     | ND      | 117     | 71      | 102     | 50      | 118     | 0       | 72      | 134      |
| 1006   | 596              | 311                    | 52%        | 9       | 12      | 30      | 53      | 16      | 39      | 52      | 16      | 28      | 56       |
| 1007   | 1,673            | 847                    | 51%        | ND      | 52      | 57      | 269     | 123     | 201     | 50      | 31      | 61      | 3        |
| 1008   | 1,503            | 819                    | 54%        | ND      | 134     | 99      | 247     | ND      | 114     | 66      | 78      | ND      | 81       |
| 1009   | 3,631            | 1,824                  | 50%        | 405     | 56      | ND      | 70      | 31      | 27      | 33      | 29      | 498     | 675      |
| 1010   | 710              | 337                    | 47%        | 93      | 5       | 5       | 5       | 7       | 17      | 5       | 37      | 90      | 73       |
| 1011   | 1,321            | 784                    | 59%        | 175     | 11      | 1       | 13      | 10      | 7       | 222     | 0       | 158     | 187      |
| 1012   | 1,161            | 746                    | 64%        | 201     | 13      | ND      | 10      | 13      | 12      | 18      | 8       | 245     | 226      |
| 1013   | 3,641            | 2,206                  | 61%        | 593     | 66      | ND      | 46      | 24      | 29      | 40      | ND      | 731     | 677      |
| 1014   | 1,668            | 891                    | 53%        | 341     | 21      | ND      | 2       | 17      | 21      | 13      | 0       | 451     | 25       |
| 1015   | 1,768            | 1,138                  | 64%        | 683     | 18      | ND      | 37      | 35      | 51      | 27      | 0       | 239     | 48       |
| 1016   | 1,830            | 1,383                  | 76%        | 517     | 81      | ND      | 37      | ND      | 52      | 53      | 255     | 388     | ND       |
| 1017   | 2,525            | 1,569                  | 62%        | 364     | ND      | ND      | 83      | 84      | 98      | 46      | 125     | 486     | 283      |
| 1018   | 4,186            | 2,731                  | 65%        | 133     | 177     | 91      | 115     | 390     | 402     | 491     | 59      | 277     | 596      |
| 1019   | 7,815            | 6,196                  | 79%        | 439     | 203     | ND      | 1309    | 620     | 446     | 345     | 548     | 525     | 1761     |
| 1020   | 4,486            | 2,842                  | 63%        | 1181    | 199     | ND      | 151     | 827     | 211     | 125     | 148     | ND      | ND       |
| 1021   | 7,854            | 4,248                  | 54%        | 814     | 674     | ND      | 1056    | 486     | 439     | 739     | 40      | ND      | ND       |
| 1022   | 1,118            | 628                    | 56%        | 45      | 178     | ND      | 61      | 66      | 87      | 47      | 35      | 109     | ND       |
| 1023   | 3,850            | 2,794                  | 73%        | ND      | 660     | 100     | 58      | 124     | 465     | 520     | 455     | 383     | 29       |
| 1024   | 4,287            | 3,173                  | 74%        | 69      | 423     | 4       | 126     | 82      | 251     | 713     | 607     | 407     | 491      |
| 1025   | 3,327            | 2,453                  | 74%        | 222     | 424     | 197     | 310     | 70      | 79      | 305     | 374     | 425     | 47       |
| 1026   | 2,027            | 1,473                  | 73%        | 32      | 199     | 102     | 19      | 148     | 215     | 184     | 279     | 295     | ND       |
| 1027   | 936              | 627                    | 67%        | 8       | 18      | 112     | 51      | 34      | 209     | 46      | 149     | ND      | ND       |

**b**

| Mutation       | Sample ID detected by MinION                                                                                                                                                                                             | Sample ID detected by Illumina                                                                                                                                                                                                                                                                                                                       |
|----------------|--------------------------------------------------------------------------------------------------------------------------------------------------------------------------------------------------------------------------|------------------------------------------------------------------------------------------------------------------------------------------------------------------------------------------------------------------------------------------------------------------------------------------------------------------------------------------------------|
| Den1:10581:C:G | 2012-14_045, 2012-14_059, 2012-14_060, 2012-14_068, 2012-14_243, 2012-14_252, 2015_B15, 2015_B48, students_08, students_09, students_18                                                                                  | 2012-14_059, 2012-14_060, 2012-14_243, 2015_B15, students_08, students_09, 2012-14_022, 2012-14_025, 2012-14_026, 2012-14_034, 2012-14_043, 2012-14_053, 2012-14_066, 2012-14_105, 2012-14_109, 2012-14_125, 2012-14_135, 2012-14_189, 2012-14_239, 2015_B16, 2015_B50, students_11, students_17, 2012-14_024, 2012-14_132, 2012-14_165, 2012-14_179 |
| Den2:10553:C:T | 2015_B18, 2012-14_166, 2015_B50, 2012-14_146, 2012-14_170                                                                                                                                                                | 2015_B50, 2012-14_146, 2012-14_004                                                                                                                                                                                                                                                                                                                   |
| Den2:10555:A:G | 2015_B18, 2012-14_166, 2015_B50, 2012-14_146, 2012-14_170, 2012-14_004                                                                                                                                                   | 2012-14_146, 2012-14_004                                                                                                                                                                                                                                                                                                                             |
| Den2:10559:G:C | 2015_B18                                                                                                                                                                                                                 |                                                                                                                                                                                                                                                                                                                                                      |
| Den2:10560:A:G | 2012-14_166, 2015_B50                                                                                                                                                                                                    | 2015_B50                                                                                                                                                                                                                                                                                                                                             |
| Den2:10573:G:A | 2015_B18, 2012-14_166, 2015_B50, 2012-14_146, 2012-14_170, 2012-14_004                                                                                                                                                   | 2015_B50, 2012-14_146, 2012-14_004                                                                                                                                                                                                                                                                                                                   |
| Den3:10357:C:T | 2012-14_009                                                                                                                                                                                                              |                                                                                                                                                                                                                                                                                                                                                      |
| Den3:10391:T:C | 2015_B30, 2015_B36, 2015_B37                                                                                                                                                                                             | 2015_B50                                                                                                                                                                                                                                                                                                                                             |
| Den3:10395:A:G | 2012-14_145                                                                                                                                                                                                              | 2012-14_145                                                                                                                                                                                                                                                                                                                                          |
| Den3:10431:G:A | 2015_B37                                                                                                                                                                                                                 |                                                                                                                                                                                                                                                                                                                                                      |
| Den3:10436:A:G | 2012-14_005, 2012-14_008, 2012-14_017, 2012-14_018, 2012-14_033, 2012-14_048, 2012-14_137, 2012-14_138, 2012-14_146, 2012-14_147, 2012-14_149, 2012-14_152, 2012-14_162, 2012-14_170, 2015_B56, 2012-14_009, 2012-14_145 | 2012-14_005, 2012-14_008, 2012-14_017, 2012-14_048, 2012-14_146, 2012-14_147, 2012-14_149, 2012-14_152, 2012-14_009, 2012-14_145                                                                                                                                                                                                                     |
| Den3:10466:A:T |                                                                                                                                                                                                                          | 2012-14_147                                                                                                                                                                                                                                                                                                                                          |
| Den4:10378:G:T |                                                                                                                                                                                                                          | 2012-14_004, 2012-14_149, 2012-14_150, 2012-14_184                                                                                                                                                                                                                                                                                                   |
| Den4:10387:C:T | 2012-14_167                                                                                                                                                                                                              |                                                                                                                                                                                                                                                                                                                                                      |
| Den4:10398:C:T | 2015_B18                                                                                                                                                                                                                 |                                                                                                                                                                                                                                                                                                                                                      |
| Den4:10399:T:G | 2012-14_167                                                                                                                                                                                                              |                                                                                                                                                                                                                                                                                                                                                      |
| Den4:10403:C:A |                                                                                                                                                                                                                          | 2012-14_034                                                                                                                                                                                                                                                                                                                                          |
| Den4:10409:G:A | 2012-14_151                                                                                                                                                                                                              |                                                                                                                                                                                                                                                                                                                                                      |

Den4:10413:A:C  
Den4:10472:C:G

2012-14\_040  
2012-14\_104

**c**

| Mutation        | Sample ID detected by MinION                                                                                                     | Sample ID detected by Illumina                                                                                                                                           |
|-----------------|----------------------------------------------------------------------------------------------------------------------------------|--------------------------------------------------------------------------------------------------------------------------------------------------------------------------|
| DENV1:10527:C:T | 13S03799, 13S03834                                                                                                               |                                                                                                                                                                          |
| DENV1:10581:C:G | 13S03834, 13S03857                                                                                                               | 13S03732, 13S03740, 13S03799, 13S03801, 13S03806, 13S03857                                                                                                               |
| DENV2:10553:C:T | 13S03873                                                                                                                         |                                                                                                                                                                          |
| DENV2:10555:A:G | 13S03873                                                                                                                         |                                                                                                                                                                          |
| DENV2:10570:C:T | 13S03873                                                                                                                         |                                                                                                                                                                          |
| DENV2:10573:G:A | 13S03873                                                                                                                         |                                                                                                                                                                          |
| DENV3:10403:G:C |                                                                                                                                  | 13S03866                                                                                                                                                                 |
| DENV3:10436:A:G | 13S03734, 13S03746, 13S03763, 13S03764, 13S03770, 13S03776, 13S03789, 13S03792, 13S03818, 13S03827, 13S03843, 13S03855, 13S03866 | 13S03866, 13S03746, 13S03763, 13S03764, 13S03770, 13S03776, 13S03780, 13S03789, 13S03792, 13S03810, 13S03818, 13S03827, 13S03836, 13S03843, 13S03855, 13S03865, 13S03872 |
| DENV4:10388:G:T | 13S03748, 13S03754, 13S03756, 13S03781, 13S03825                                                                                 | 13S03748, 13S03754, 13S03756, 13S03766, 13S03795, 13S03820, 13S03833, 13S03845, 13S03846, 13S03854, 13S03868, 13S03825, 13S03859                                         |
| DENV4:10405:C:T |                                                                                                                                  | 13S03825, 13S03859                                                                                                                                                       |

**d**

| Mutation        | Sample ID detected by MinION | Sample ID detected by Illumina |
|-----------------|------------------------------|--------------------------------|
| DENV1:10527:C:T | 01-0777                      | 01-0777, 02-0083               |
| DENV1:10581:C:G | 02-0083                      | 01-0777, 02-0083               |
| DENV2:10553:C:T | 02-0074                      | 02-0074                        |
| DENV2:10555:A:G | 02-0074                      | 02-0074                        |
| DENV2:10568:G:A | 02-0074, 03-0067, 03-0164    | 02-0074, 03-0067, 03-0164      |
| DENV2:10571:T:C | 03-0164                      | 03-0164                        |
| DENV2:10573:G:A | 02-0074                      |                                |
| DENV2:10577:G:C | 02-0074                      | 02-0074                        |
| DENV2:10578:A:G |                              | 02-0074                        |
| DENV3:10436:A:G | 02-0163                      |                                |
| DENV4:10388:G:T | 01-0122, 03-0031             | 01-0122, 03-0031               |

**Table S7 | Results of MinION analysis by the multiplex analysis for clinical samples.**

**a**, The number of sequences associated with the indicated barcoding oligos. **b**, **c**, **d**, SNVs detected from multiplexed MinION reads. The positions and patterns of the SNVs and their validation analyses are shown for the indicated samples from Indonesia (**b**), Vietnam (**c**), and Thailand (**d**).



calculation in this paper:  $\text{identical base} / (\text{identical base} + \text{mismatch base} + \text{insertion base} + \text{deletion base})$

|                         | Den1  | Den2  | Den3  | Den4  |
|-------------------------|-------|-------|-------|-------|
| last tuned (this paper) | 76.9% | 78.6% | 81.7% | 78.5% |
| last460                 | 76.9% | 78.1% | 80.2% | 77.1% |
| last460 (MarginAlign)   | 72.3% | 71.9% | 73.4% | 71.2% |
| bwa                     | 77.6% | 78.2% | 80.4% | 78.4% |
| bwa (MarginAlign)       | 75.1% | 74.9% | 78.4% | 76.4% |

calculation (according to MarginStats):

$\text{identical base} / (\text{identical base} + \text{mismatch base} + \text{insertion base})$

|                         | Den1  | Den2  | Den3  | Den4  |
|-------------------------|-------|-------|-------|-------|
| last tuned (this paper) | 84.8% | 83.9% | 85.7% | 82.4% |
| last460                 | 84.9% | 83.8% | 84.7% | 81.2% |
| last460 (MarginAlign)   | 82.5% | 80.3% | 80.0% | 76.0% |
| bwa                     | 85.4% | 83.8% | 84.9% | 82.3% |
| bwa (MarginAlign)       | 86.1% | 83.6% | 85.1% | 82.0% |

| Tool              | URL                                                                                                       | Version      | Command                                                                                                                                                       |
|-------------------|-----------------------------------------------------------------------------------------------------------|--------------|---------------------------------------------------------------------------------------------------------------------------------------------------------------|
| last (this paper) | <a href="http://last.cbrc.jp/">http://last.cbrc.jp/</a>                                                   | 548( 658)    | lastal -q12 -a15 -b3 -e150 -m100 -Q1 -j4 \$indexFile \$fastq   last-split -m1 -maf-convert.py sam -d \$mafFile   samtools view -Sb -   samtools sort - -o bam |
| last460           | <a href="http://last.cbrc.jp/">http://last.cbrc.jp/</a>                                                   | 460          | lastal -s 2 -T 0 -Q 0 -a 1 \$indexFile \$fasta > \$mafFile<br>maf-convert.py sam -d \$mafFile   samtools view -Sb -   samtools sort - -o bam                  |
| bwa               | <a href="http://bio-bwa.sourceforge.net/">http://bio-bwa.sourceforge.net/</a>                             | 0.7.12-r1044 | bwa mem -x ont2d \$ref \$fastq   samtools view -Sb -   samtools sort - -o bam                                                                                 |
| marginAlign       | <a href="https://github.com/benedictpaten/marginAlign/">https://github.com/benedictpaten/marginAlign/</a> | 0.1          | marginAlign ..\$fastq .\$refFasta \$sam --em (--bwa) --outputModel \$model --jobTree \$treeoutputdir                                                          |

**Table S8 | MinION performance between the pipeline described in this paper and MarginAlign.**

| Category    | #of samples | Diagnosed serotypes # (%) |     |                  |     |    |     |
|-------------|-------------|---------------------------|-----|------------------|-----|----|-----|
|             |             | Serotype detected         | %   | Serotype elusive | %   | ND | %   |
| NS1+        | 67          | 49                        | 73% | 6                | 9%  | 12 | 18% |
| Ig+         | 60          | 40                        | 67% | 6                | 10% | 14 | 23% |
| No evidence | 14          | 2                         | 14% | 0                | 0%  | 12 | 86% |
| Total       | 141         | 91                        | 65% | 12               | 8%  | 38 | 27% |

**Table S9 | Serotyping results and medical evidence**

| Year      | Region   | Total samples | Target genes | Serotype | Genotype                                  | Amino Acid                                                 | Reference                   |
|-----------|----------|---------------|--------------|----------|-------------------------------------------|------------------------------------------------------------|-----------------------------|
| 2004      | Malaysia | 101           | E protein    | DENV1    | Ic (98%)<br>II (2%)                       | D37, K120, E157<br>D37, T88, D157, K120, T225, S339, V345  | Boon-Teong Teoh (2013)      |
| 1974-2001 | Thailand | 105           | E protein    | DENV2    | Asian I (96.2%)<br>Asian/American (3.8%)  |                                                            | Chunlin Zhang (2006)        |
| 2003-2008 | Vietnam  | 187           | E protein    | DENV2    | Asian I (74.3%)<br>Asian/American (24.6%) | K83, N203, K226, E228, Y346<br>N83, D203, T226, G228, H346 | Vu Thi Ty Hang (2010)       |
| 2004      | Jakarta  | 10            | E protein    | DENV3    | I                                         | V68, V169, K231, S301, A303, V479                          | Chwan-Chuen King (2008)     |
| 1998      | Taiwan   | 4             | E protein    | DENV3    | II                                        | P124, Y132, D154, V160, V169, N270, V479                   | Chwan-Chuen King (2008)     |
| 1994      | Thailand | 2             | E protein    | DENV3    | II                                        | V68, P124, D154, V160, N270, V479                          | Chwan-Chuen King (2008)     |
| 2001      | Malaysia | 5             | E protein    | DENV4    | IIA                                       | V108, L120, I335, D384, V455, L461                         | Sazaly AbuBakar (2002)      |
| 1998-2002 | Bangkok  | 53            | E protein    | DENV4    | I (90.5%)<br>III (9.5%)                   |                                                            | Chonticha Klungthong (2004) |

**Table S10 | Genotyping of each DENV serotype**

| Flow cell version | Price       | Number of experiment | Cost per experiment |
|-------------------|-------------|----------------------|---------------------|
| FLO_MAP002        | \$1,998.00  | 2                    | \$999.00            |
| FLO_MAP003        | \$1,998.00  | 2                    | \$999.00            |
| FLO_MAP103        | \$900.00    | 1                    | \$900.00            |
| FLO_MAP103.48     | \$24,000.00 | 48                   | \$500.00            |
| FLO_MAP104        | \$900.00    | 1                    | \$900.00            |
| FLO_MAP104.48     | \$24,000.00 | 48                   | \$500.00            |

| Reagent version | Price    | Number of experiment | Cost per experiment |
|-----------------|----------|----------------------|---------------------|
| SQK_MAP004      | \$499.00 | 3                    | \$166.33            |
| SQK_MAP005      | \$599.00 | 6                    | \$99.83             |
| SQK_MAP006      | \$599.00 | 6                    | \$99.83             |
| SQK_MAP007      | \$599.00 | 6                    | \$99.83             |

Table S11 | Price of MinION flow cell and reagents

**Method S1 | RT-PCR protocol**

SuperScript® One-Step RT-PCR System with Platinum® Taq DNA Polymerase  
<https://www.thermofisher.com/order/catalog/product/10928042?ICID=search-product>

|                            |        |
|----------------------------|--------|
| 2X Reaction Mix            | 25 µL  |
| Template RNA               | 1 µL   |
| Sense Primer (10 µM)       | 1 µL   |
| Anti-sense Primer (10 µM)  | 1 µL   |
| RT/ Platinum® Taq Mix      | 0.5 µL |
| Autoclaved distilled water | 6.5 µL |

Perform 1 cycle of:

- 50°C for 30 minutes
- 94°C for 2 minutes

Perform 40 cycles of:

- Denature: 94°C for 30 seconds
- Annealing: 53°C for 30 seconds
- Extension: 72°C for 1 minute/kb

Perform 1 cycle of 72°C for 2 minutes
