# Supplementary material for: Serotyping dengue virus with isothermal amplification and a portable sequencer
Source: Springer Nature journal article supplement (doi:10.1038/s41598-017-03734-5), 2017-06-08
Supplement: MOESM2 [file 41598_2017_3734_MOESM2_ESM.xls]

## Sheet: Indonesia_single
No.	Sample name	Examined serotype	Evidence	RT-PCR (NA: not analyzed, ND: not detected)	Sanger (NA: not analyzed, ND: not detected)	LAMP (NA: not analyzed, ND: not detected)	LAMP products (ng/ul)	Nanopore	Illumina	Nanopore SNP call	Illumina SNP call	# target hit reads
1	2015_B24	D1	NS1+	1	1	1	377	D1	D1		Den1:10581:C:G	1087
2	2015_B49	D2	NS1+	2	2	2	1932	D2	D2	Den2:10553:C:T;Den2:10555:A:G;Den2:10560:A:G;Den2:10573:G:A	Den2:10555:A:G;Den2:10560:A:G;Den2:10573:G:A	3534
3	2015_B54	D3	IgG+	3	3	3	305	D3	D3	Den3:10391:T:C	Den3:10391:T:C	2666
4	2015_B17	D4	NS1+	4	4	4	334	D4	NA			2842
5	2014May_01	D1	NA	ND	NA	1	285	D1	D1		Den1:10581:C:G	130
6	2014May_01	D2	NA	ND	NA	ND		NA	NA
7	2014May_01	D3	NA	ND	NA	ND		NA	NA
8	2014May_01	D4	NA	ND	NA	ND		NA	NA
9	2014May_11	D1	NA	NA	NA	1	76	D1	D1		Den1:10581:C:G	522
10	2014May_11	D2	NA	ND	NA	ND	ND	NA	NA
11	2014May_11	D3	NA	ND	NA	ND	ND	NA	NA
12	2014May_11	D4	NA	ND	NA	ND	ND	NA	NA
13	2014May_17	D1	NA	NA	NA	1	448	D1	NA			381
14	2014May_17	D2	NA	NA	NA	ND	ND	NA	NA
15	2014May_17	D3	NA	NA	NA	ND	ND	NA	NA
16	2014May_17	D4	NA	NA	NA	ND	ND	NA	NA
17	2014May_21	D1	NA	ND	NA	1	495	D1	NA			159
18	2014May_21	D2	NA	ND	NA	ND	ND	NA	NA
19	2014May_21	D3	NA	ND	NA	ND	ND	NA	NA
20	2014May_21	D4	NA	ND	NA	ND	ND	NA	NA
21	2015_B03	D1	IgG+	1	NA	1	255	D1	NA	Den1:10581:C:G		351
22	2015_B03	D2	IgG+	ND	NA	ND	0	NA	NA
23	2015_B03	D3	IgG+	ND	NA	ND	0	NA	NA
24	2015_B03	D4	IgG+	ND	NA	ND	0	NA	NA
25	2015_B25	D1	NS1+	1	NA	1	182	D1	D1	Den1:10581:C:G	Den1:10581:C:G	563
26	2015_B25	D2	NS1+	ND	NA	ND	0	NA	NA
27	2015_B25	D3	NS1+	ND	NA	ND	0	NA	NA
28	2015_B25	D4	NS1+	ND	NA	ND	0	NA	NA
29	2015_B28	D1	NS1+	ND	NA	ND	0	NA	NA
30	2015_B28	D2	NS1+	ND	NA	ND	0	NA	NA
31	2015_B28	D3	NS1+	3	NA	3	447	D3	D3	Den3:10391:T:C	Den3:10391:T:C	806
32	2015_B28	D4	NS1+	ND	NA	ND	0	NA	NA

## Sheet: Indonesia_multiplex
No.	Sample name	Examined serotype	Pie chart category	Evidence	RT-PCR (NA: not analyzed, ND: not detected)	Sanger (NA: not analyzed, ND: not detected)	LAMP (NA: not analyzed, ND: not detected)	LAMP products (ng/ul)	Nanopore	Illumina	Nanopore SNP call	Illumina SNP call	Nanopore Illumina result consistency	# assigned reads
1	2012-14_001	D1	Serotype determined	IgG+ IgM+	ND	NA	1	469	NG	NA	NG	NA		10
2	2012-14_001	D2	Serotype determined	IgG+ IgM+	ND	NA	2	1082	NG	NA	NG	NA		0
3	2012-14_001	D3	Serotype determined	IgG+ IgM+	ND	NA	3	109	NG	NA	NG	NA		36
4	2012-14_001	D4	Serotype determined	IgG+ IgM+	ND	NA	4	121	D4	NA		NA		25
5	2012-14_002	D1	Serotype determined	IgG+ IgM+	ND	NA	1	89	D1	NA		NA		64
6	2012-14_002	D2	Serotype determined	IgG+ IgM+	ND	NA	2	43	NG	NA	NG	NA		2
7	2012-14_002	D3	Serotype determined	IgG+ IgM+	ND	NA	3	77	NG	NA	NG	NA		43
8	2012-14_002	D4	Serotype determined	IgG+ IgM+	ND	NA	ND	0	NA	NA	NA	NA		NA
9	2012-14_004	D1	Multiple serotype candidates	IgM+	ND	NA	ND	0	NA	NA	NA	NA	consistent	NA
10	2012-14_004	D2	Multiple serotype candidates	IgM+	ND	NA	2	60	D2	D2	Den2:10555:A:G;Den2:10573:G:A	Den2:10553:C:T;Den2:10555:A:G;Den2:10573:G:A	consistent	18
11	2012-14_004	D3	Multiple serotype candidates	IgM+	ND	NA	ND	0	NA	NA	NA	NA	consistent	NA
12	2012-14_004	D4	Multiple serotype candidates	IgM+	ND	NA	4	91	D4	D4		Den4:10378:G:T	consistent	64
13	2012-14_005	D1	Multiple serotype candidates	NS1+	NA	NA	ND	0	NA	NA	NA	NA	consistent	NA
14	2012-14_005	D2	Multiple serotype candidates	NS1+	NA	NA	2	133	NG	NA	NG	NA	consistent	6
15	2012-14_005	D3	Multiple serotype candidates	NS1+	NA	NA	3	59	D3	D3	Den3:10436:A:G	Den3:10436:A:G	consistent	227
16	2012-14_005	D4	Multiple serotype candidates	NS1+	NA	NA	4	89	D4	D4			consistent	172
17	2012-14_008	D1	Serotype determined	IgG+ IgM+	NA	NA	ND	0	NA	NA	NA	NA	consistent	NA
18	2012-14_008	D2	Serotype determined	IgG+ IgM+	NA	NA	2	34	NA	NA	NA	NA	consistent	NA
19	2012-14_008	D3	Serotype determined	IgG+ IgM+	NA	NA	3	63	D3	D3	Den3:10436:A:G	Den3:10436:A:G	consistent	51
20	2012-14_008	D4	Serotype determined	IgG+ IgM+	NA	NA	ND	0	NA	NA	NA	NA	consistent	NA
21	2012-14_009	D1	Serotype determined	NS1+	1	NA	1	25	NA	NA	NA	NA	consistent	NA
22	2012-14_009	D2	Serotype determined	NS1+	ND	NA	ND	0	NA	NA	NA	NA	consistent	NA
23	2012-14_009	D3	Serotype determined	NS1+	ND	NA	3	39	D3	D3	Den3:10357:C:T;Den3:10436:A:G	Den3:10436:A:G	consistent	203
24	2012-14_009	D4	Serotype determined	NS1+	ND	NA	ND	0	NA	NA	NA	NA	consistent	NA
25	2012-14_010	D1	Serotype determined	NS1+	NA	NA	1	61	D1	NA		NA		116
26	2012-14_010	D2	Serotype determined	NS1+	NA	NA	ND	0	NA	NA	NA	NA		NA
27	2012-14_010	D3	Serotype determined	NS1+	NA	NA	3	35	NA	NA	NA	NA		NA
28	2012-14_010	D4	Serotype determined	NS1+	NA	NA	ND	0	NA	NA	NA	NA		NA
29	2012-14_011	D1	Serotype determined	NS1+	ND	NA	ND	0	NA	NA	NA	NA	consistent	NA
30	2012-14_011	D2	Serotype determined	NS1+	ND	NA	ND	0	NA	NA	NA	NA	consistent	NA
31	2012-14_011	D3	Serotype determined	NS1+	ND	NA	ND	0	NA	NA	NA	NA	consistent	NA
32	2012-14_011	D4	Serotype determined	NS1+	ND	NA	4	34	D4	D4			consistent	67
33	2012-14_013	D1	Serotype determined	NS1+	ND	NA	ND	0	NA	NA	NA	NA	consistent	NA
34	2012-14_013	D2	Serotype determined	NS1+	ND	NA	ND	0	NA	NA	NA	NA	consistent	NA
35	2012-14_013	D3	Serotype determined	NS1+	ND	NA	ND	0	NA	NA	NA	NA	consistent	NA
36	2012-14_013	D4	Serotype determined	NS1+	ND	NA	4	47	D4	D4			consistent	144
37	2012-14_014	D1	Serotype determined	IgG+ IgM+	ND	NA	ND	0	NA	NA	NA	NA		NA
38	2012-14_014	D2	Serotype determined	IgG+ IgM+	ND	NA	2	62	NG	NA	NG	NA		7
39	2012-14_014	D3	Serotype determined	IgG+ IgM+	ND	NA	ND	0	NA	NA	NA	NA		NA
40	2012-14_014	D4	Serotype determined	IgG+ IgM+	ND	NA	4	47	D4	NA		NA		80
41	2012-14_015	D1	Serotype determined	NS1+	ND	NA	ND	0	NA	NA	NA	NA	consistent	NA
42	2012-14_015	D2	Serotype determined	NS1+	ND	NA	ND	0	NA	NA	NA	NA	consistent	NA
43	2012-14_015	D3	Serotype determined	NS1+	ND	NA	ND	0	NA	NA	NA	NA	consistent	NA
44	2012-14_015	D4	Serotype determined	NS1+	ND	NA	4	40	D4	D4			consistent	99
45	2012-14_016	D1	Serotype determined	NS1+	NA	NA	ND	0	NA	NA	NA	NA	consistent	NA
46	2012-14_016	D2	Serotype determined	NS1+	NA	NA	ND	0	NA	NA	NA	NA	consistent	NA
47	2012-14_016	D3	Serotype determined	NS1+	NA	NA	ND	0	NA	NA	NA	NA	consistent	NA
48	2012-14_016	D4	Serotype determined	NS1+	NA	NA	4	48	D4	D4			consistent	58
49	2012-14_017	D1	Serotype determined	IgG+	ND	NA	ND	0	NA	NA	NA	NA	consistent	NA
50	2012-14_017	D2	Serotype determined	IgG+	ND	NA	ND	0	NA	NA	NA	NA	consistent	NA
51	2012-14_017	D3	Serotype determined	IgG+	ND	NA	3	85	D3	D3	Den3:10436:A:G	Den3:10436:A:G	consistent	145
52	2012-14_017	D4	Serotype determined	IgG+	ND	NA	ND	0	NA	NA	NA	NA	consistent	NA
53	2012-14_018	D1	Serotype determined	NS1+	ND	NA	1	413	NG	NA	NG	NA		19
54	2012-14_018	D2	Serotype determined	NS1+	ND	NA	ND	0	NA	NA	NA	NA		NA
55	2012-14_018	D3	Serotype determined	NS1+	ND	NA	3	94	D3	NA	Den3:10436:A:G	NA		96
56	2012-14_018	D4	Serotype determined	NS1+	ND	NA	ND	0	NA	NA	NA	NA		NA
57	2012-14_022	D1	Serotype determined	NS1+	ND	NA	1	199	D1	D1		Den1:10581:C:G	consistent	44
58	2012-14_022	D2	Serotype determined	NS1+	ND	NA	ND	0	NA	NA	NA	NA	consistent	NA
59	2012-14_022	D3	Serotype determined	NS1+	ND	NA	ND	0	NA	NA	NA	NA	consistent	NA
60	2012-14_022	D4	Serotype determined	NS1+	ND	NA	ND	0	NA	NA	NA	NA	consistent	NA
61	2012-14_023	D1	Serotype determined	NS1+	ND	NA	1	44	D1	NA		NA		87
62	2012-14_023	D2	Serotype determined	NS1+	ND	NA	ND	0	NA	NA	NA	NA		NA
63	2012-14_023	D3	Serotype determined	NS1+	ND	NA	ND	0	NA	NA	NA	NA		NA
64	2012-14_023	D4	Serotype determined	NS1+	ND	NA	ND	0	NA	NA	NA	NA		NA
65	2012-14_024	D1	Serotype determined	NS1+	NA	NA	1	154	D1	D1		Den1:10581:C:G	consistent	82
66	2012-14_024	D2	Serotype determined	NS1+	NA	NA	ND	0	NA	NA	NA	NA	consistent	NA
67	2012-14_024	D3	Serotype determined	NS1+	NA	NA	ND	0	NA	NA	NA	NA	consistent	NA
68	2012-14_024	D4	Serotype determined	NS1+	NA	NA	ND	0	NA	NA	NA	NA	consistent	NA
69	2012-14_025	D1	Serotype determined	IgG+ IgM+	NA	NA	1	440	D1	D1		Den1:10581:C:G	consistent	124
70	2012-14_025	D2	Serotype determined	IgG+ IgM+	NA	NA	ND	0	NA	NA	NA	NA	consistent	NA
71	2012-14_025	D3	Serotype determined	IgG+ IgM+	NA	NA	ND	0	NA	NA	NA	NA	consistent	NA
72	2012-14_025	D4	Serotype determined	IgG+ IgM+	NA	NA	ND	0	NA	NA	NA	NA	consistent	NA
73	2012-14_026	D1	Serotype determined	IgG- IgM+	NA	NA	1	114	D1	D1		Den1:10581:C:G	consistent	70
74	2012-14_026	D2	Serotype determined	IgG- IgM+	NA	NA	ND	0	NA	NA	NA	NA	consistent	NA
75	2012-14_026	D3	Serotype determined	IgG- IgM+	NA	NA	ND	0	NA	NA	NA	NA	consistent	NA
76	2012-14_026	D4	Serotype determined	IgG- IgM+	NA	NA	ND	0	NA	NA	NA	NA	consistent	NA
77	2012-14_031	D1	Serotype determined	NS1+	NA	NA	1	39	NA	NA	NA	NA		NA
78	2012-14_031	D2	Serotype determined	NS1+	NA	NA	ND	0	NA	NA	NA	NA		NA
79	2012-14_031	D3	Serotype determined	NS1+	NA	NA	ND	0	NA	NA	NA	NA		NA
80	2012-14_031	D4	Serotype determined	NS1+	NA	NA	4	88	D4	NA		NA		93
81	2012-14_032	D1	Serotype determined	NS1+	ND	NA	ND	0	NA	NA	NA	NA	consistent	NA
82	2012-14_032	D2	Serotype determined	NS1+	ND	NA	ND	0	NA	NA	NA	NA	consistent	NA
83	2012-14_032	D3	Serotype determined	NS1+	ND	NA	ND	0	NA	NA	NA	NA	consistent	NA
84	2012-14_032	D4	Serotype determined	NS1+	ND	NA	4	100	D4	D4			consistent	40
85	2012-14_033	D1	Multiple serotype candidates	NS1+	ND	NA	ND	0	NA	NA	NA	NA		NA
86	2012-14_033	D2	Multiple serotype candidates	NS1+	ND	NA	2	61	NG	NA	NG	NA		12
87	2012-14_033	D3	Multiple serotype candidates	NS1+	ND	NA	3	43	D3	NA	Den3:10436:A:G	NA		111
88	2012-14_033	D4	Multiple serotype candidates	NS1+	ND	NA	4	45	D4	NA		NA		99
89	2012-14_034	D1	Multiple serotype candidates	NS1+	NA	NA	1	64	D1	D1		Den1:10581:C:G	consistent	116
90	2012-14_034	D2	Multiple serotype candidates	NS1+	NA	NA	ND	0	NA	NA	NA	NA	consistent	NA
91	2012-14_034	D3	Multiple serotype candidates	NS1+	NA	NA	ND	0	NA	NA	NA	NA	consistent	NA
92	2012-14_034	D4	Multiple serotype candidates	NS1+	NA	NA	4	60	D4	D4		Den4:10403:C:A	consistent	88
93	2012-14_035	D1	Not detected	IgG+ IgM+	NA	NA	ND	0	NA	NA	NA	NA		NA
94	2012-14_035	D2	Not detected	IgG+ IgM+	NA	NA	ND	0	NA	NA	NA	NA		NA
95	2012-14_035	D3	Not detected	IgG+ IgM+	NA	NA	ND	0	NA	NA	NA	NA		NA
96	2012-14_035	D4	Not detected	IgG+ IgM+	NA	NA	ND	0	NA	NA	NA	NA		NA
97	2012-14_037	D1	Serotype determined	IgG+ IgM+	ND	NA	ND	0	NA	NA	NA	NA	consistent	NA
98	2012-14_037	D2	Serotype determined	IgG+ IgM+	ND	NA	2	70	NG	NA	NG	NA	consistent	8
99	2012-14_037	D3	Serotype determined	IgG+ IgM+	ND	NA	ND	0	NA	NA	NA	NA	consistent	NA
100	2012-14_037	D4	Serotype determined	IgG+ IgM+	ND	NA	4	90	D4	D4			consistent	33
101	2012-14_038	D1	Not detected	NS1+	NA	NA	ND	0	NA	NA	NA	NA		NA
102	2012-14_038	D2	Not detected	NS1+	NA	NA	ND	0	NA	NA	NA	NA		NA
103	2012-14_038	D3	Not detected	NS1+	NA	NA	ND	0	NA	NA	NA	NA		NA
104	2012-14_038	D4	Not detected	NS1+	NA	NA	ND	0	NA	NA	NA	NA		NA
105	2012-14_039	D1	Serotype undetermined	NS1+	NA	NA	ND	0	NA	NA	NA	NA		NA
106	2012-14_039	D2	Serotype undetermined	NS1+	NA	NA	ND	0	NA	NA	NA	NA		NA
107	2012-14_039	D3	Serotype undetermined	NS1+	NA	NA	3	54	NG	NA	NG	NA		2
108	2012-14_039	D4	Serotype undetermined	NS1+	NA	NA	ND	0	NA	NA	NA	NA		NA
109	2012-14_040	D1	Serotype determined	IgG+ IgM+	NA	NA	ND	0	NA	NA	NA	NA	consistent	NA
110	2012-14_040	D2	Serotype determined	IgG+ IgM+	NA	NA	2	29	NA	NA	NA	NA	consistent	NA
111	2012-14_040	D3	Serotype determined	IgG+ IgM+	NA	NA	ND	0	NA	NA	NA	NA	consistent	NA
112	2012-14_040	D4	Serotype determined	IgG+ IgM+	NA	NA	4	105	D4	D4		Den4:10413:A:C	consistent	50
113	2012-14_041	D1	Serotype undetermined	IgG- IgM+	NA	NA	1	126	NG	NA	NG	NA		19
114	2012-14_041	D2	Serotype undetermined	IgG- IgM+	NA	NA	ND	0	NA	NA	NA	NA		NA
115	2012-14_041	D3	Serotype undetermined	IgG- IgM+	NA	NA	ND	0	NA	NA	NA	NA		NA
116	2012-14_041	D4	Serotype undetermined	IgG- IgM+	NA	NA	ND	0	NA	NA	NA	NA		NA
117	2012-14_042	D1	Serotype determined	IgG+ IgM+	NA	NA	1	106	D1	NA		NA		407
118	2012-14_042	D2	Serotype determined	IgG+ IgM+	NA	NA	2	38	NA	NA	NA	NA		NA
119	2012-14_042	D3	Serotype determined	IgG+ IgM+	NA	NA	ND	0	NA	NA	NA	NA		NA
120	2012-14_042	D4	Serotype determined	IgG+ IgM+	NA	NA	ND	0	NA	NA	NA	NA		NA
121	2012-14_043	D1	Serotype determined	IgG+ IgM+	NA	NA	1	62	D1	D1		Den1:10581:C:G	consistent	159
122	2012-14_043	D2	Serotype determined	IgG+ IgM+	NA	NA	ND	0	NA	NA	NA	NA	consistent	NA
123	2012-14_043	D3	Serotype determined	IgG+ IgM+	NA	NA	ND	0	NA	NA	NA	NA	consistent	NA
124	2012-14_043	D4	Serotype determined	IgG+ IgM+	NA	NA	ND	0	NA	NA	NA	NA	consistent	NA
125	2012-14_044	D1	Serotype determined	NS1+	NA	NA	1	68	D1	NA		NA		110
126	2012-14_044	D2	Serotype determined	NS1+	NA	NA	ND	0	NA	NA	NA	NA		NA
127	2012-14_044	D3	Serotype determined	NS1+	NA	NA	ND	0	NA	NA	NA	NA		NA
128	2012-14_044	D4	Serotype determined	NS1+	NA	NA	ND	0	NA	NA	NA	NA		NA
129	2012-14_045	D1	Serotype determined	IgG+ IgM+	NA	NA	1	24	D1	NA	Den1:10581:C:G	NA		110
130	2012-14_045	D2	Serotype determined	IgG+ IgM+	NA	NA	ND	0	NA	NA	NA	NA		NA
131	2012-14_045	D3	Serotype determined	IgG+ IgM+	NA	NA	ND	0	NA	NA	NA	NA		NA
132	2012-14_045	D4	Serotype determined	IgG+ IgM+	NA	NA	ND	0	NA	NA	NA	NA		NA
133	2012-14_046	D1	Serotype determined	IgG+ IgM-	NA	NA	1	62	D1	NA		NA		215
134	2012-14_046	D2	Serotype determined	IgG+ IgM-	NA	NA	ND	0	NA	NA	NA	NA		NA
135	2012-14_046	D3	Serotype determined	IgG+ IgM-	NA	NA	ND	0	NA	NA	NA	NA		NA
136	2012-14_046	D4	Serotype determined	IgG+ IgM-	NA	NA	ND	0	NA	NA	NA	NA		NA
137	2012-14_047	D1	Not detected	IgG+ IgM+	NA	NA	1	35	NA	NA	NA	NA		NA
138	2012-14_047	D2	Not detected	IgG+ IgM+	NA	NA	ND	0	NA	NA	NA	NA		NA
139	2012-14_047	D3	Not detected	IgG+ IgM+	NA	NA	3	30	NA	NA	NA	NA		NA
140	2012-14_047	D4	Not detected	IgG+ IgM+	NA	NA	ND	0	NA	NA	NA	NA		NA
141	2012-14_048	D1	Serotype determined	IgG+ IgM+	ND	NA	ND	0	NA	NA	NA	NA	consistent	NA
142	2012-14_048	D2	Serotype determined	IgG+ IgM+	ND	NA	ND	0	NA	NA	NA	NA	consistent	NA
143	2012-14_048	D3	Serotype determined	IgG+ IgM+	ND	NA	3	72	D3	D3	Den3:10436:A:G	Den3:10436:A:G	consistent	120
144	2012-14_048	D4	Serotype determined	IgG+ IgM+	ND	NA	ND	0	NA	NA	NA	NA	consistent	NA
145	2012-14_051	D1	Serotype determined	NS1+	NA	NA	1	80	D1	NA		NA		455
146	2012-14_051	D2	Serotype determined	NS1+	NA	NA	2	39	NA	NA	NA	NA		NA
147	2012-14_051	D3	Serotype determined	NS1+	NA	NA	ND	0	NA	NA	NA	NA		NA
148	2012-14_051	D4	Serotype determined	NS1+	NA	NA	ND	0	NA	NA	NA	NA		NA
149	2012-14_053	D1	Serotype determined	NS1+	NA	NA	1	61	D1	D1		Den1:10581:C:G	consistent	374
150	2012-14_053	D2	Serotype determined	NS1+	NA	NA	ND	0	NA	NA	NA	NA	consistent	NA
151	2012-14_053	D3	Serotype determined	NS1+	NA	NA	ND	0	NA	NA	NA	NA	consistent	NA
152	2012-14_053	D4	Serotype determined	NS1+	NA	NA	ND	0	NA	NA	NA	NA	consistent	NA
153	2012-14_056	D1	Serotype determined	IgG+ IgM+	NA	NA	1	45	D1	NA		NA		279
154	2012-14_056	D2	Serotype determined	IgG+ IgM+	NA	NA	ND	0	NA	NA	NA	NA		NA
155	2012-14_056	D3	Serotype determined	IgG+ IgM+	NA	NA	3	33	NA	NA	NA	NA		NA
156	2012-14_056	D4	Serotype determined	IgG+ IgM+	NA	NA	ND	0	NA	NA	NA	NA		NA
157	2012-14_059	D1	Serotype determined	IgG+ IgM+	NA	NA	1	47	D1	D1	Den1:10581:C:G	Den1:10581:C:G	consistent	149
158	2012-14_059	D2	Serotype determined	IgG+ IgM+	NA	NA	2	15	NA	NA	NA	NA	consistent	NA
159	2012-14_059	D3	Serotype determined	IgG+ IgM+	NA	NA	ND	0	NA	NA	NA	NA	consistent	NA
160	2012-14_059	D4	Serotype determined	IgG+ IgM+	NA	NA	ND	0	NA	NA	NA	NA	consistent	NA
161	2012-14_060	D1	Serotype determined	NS1+	NA	NA	1	61	D1	D1	Den1:10581:C:G	Den1:10581:C:G	consistent	27
162	2012-14_060	D2	Serotype determined	NS1+	NA	NA	ND	0	NA	NA	NA	NA	consistent	NA
163	2012-14_060	D3	Serotype determined	NS1+	NA	NA	ND	0	NA	NA	NA	NA	consistent	NA
164	2012-14_060	D4	Serotype determined	NS1+	NA	NA	ND	0	NA	NA	NA	NA	consistent	NA
165	2012-14_061	D1	Serotype determined	IgG+	ND	NA	ND	0	NA	NA	NA	NA	inconsistent	NA
166	2012-14_061	D2	Serotype determined	IgG+	ND	NA	ND	0	NA	NA	NA	NA	inconsistent	NA
167	2012-14_061	D3	Serotype determined	IgG+	ND	NA	3	46	D3	NG		NG	inconsistent	97
168	2012-14_061	D4	Serotype determined	IgG+	ND	NA	ND	0	NA	NA	NA	NA	inconsistent	NA
169	2012-14_062	D1	Serotype determined	NS1+	NA	NA	1	312	D1	NA		NA		32
170	2012-14_062	D2	Serotype determined	NS1+	NA	NA	ND	0	NA	NA	NA	NA		NA
171	2012-14_062	D3	Serotype determined	NS1+	NA	NA	3	35	NA	NA	NA	NA		NA
172	2012-14_062	D4	Serotype determined	NS1+	NA	NA	ND	0	NA	NA	NA	NA		NA
173	2012-14_065	D1	Serotype undetermined	NS1+	NA	NA	1	50	NG	NA	NG	NA		16
174	2012-14_065	D2	Serotype undetermined	NS1+	NA	NA	ND	0	NA	NA	NA	NA		NA
175	2012-14_065	D3	Serotype undetermined	NS1+	NA	NA	ND	0	NA	NA	NA	NA		NA
176	2012-14_065	D4	Serotype undetermined	NS1+	NA	NA	ND	0	NA	NA	NA	NA		NA
177	2012-14_066	D1	Serotype determined	IgG+ IgM+	NA	NA	1	67	D1	D1		Den1:10581:C:G	consistent	607
178	2012-14_066	D2	Serotype determined	IgG+ IgM+	NA	NA	ND	0	NA	NA	NA	NA	consistent	NA
179	2012-14_066	D3	Serotype determined	IgG+ IgM+	NA	NA	ND	0	NA	NA	NA	NA	consistent	NA
180	2012-14_066	D4	Serotype determined	IgG+ IgM+	NA	NA	ND	0	NA	NA	NA	NA	consistent	NA
181	2012-14_068	D1	Serotype determined	IgG+ IgM+	NA	NA	1	131	D1	NA	Den1:10581:C:G	NA		51
182	2012-14_068	D2	Serotype determined	IgG+ IgM+	NA	NA	ND	0	NA	NA	NA	NA		NA
183	2012-14_068	D3	Serotype determined	IgG+ IgM+	NA	NA	ND	0	NA	NA	NA	NA		NA
184	2012-14_068	D4	Serotype determined	IgG+ IgM+	NA	NA	ND	0	NA	NA	NA	NA		NA
185	2012-14_075	D1	Serotype determined	NS1+	NA	NA	1	218	D1	NA		NA		34
186	2012-14_075	D2	Serotype determined	NS1+	NA	NA	ND	0	NA	NA	NA	NA		NA
187	2012-14_075	D3	Serotype determined	NS1+	NA	NA	3	18	NA	NA	NA	NA		NA
188	2012-14_075	D4	Serotype determined	NS1+	NA	NA	ND	0	NA	NA	NA	NA		NA
189	2012-14_085	D1	Serotype determined	NS1+	NA	NA	1	242	D1	NA		NA		46
190	2012-14_085	D2	Serotype determined	NS1+	NA	NA	ND	0	NA	NA	NA	NA		NA
191	2012-14_085	D3	Serotype determined	NS1+	NA	NA	ND	0	NA	NA	NA	NA		NA
192	2012-14_085	D4	Serotype determined	NS1+	NA	NA	ND	0	NA	NA	NA	NA		NA
193	2012-14_104	D1	Serotype determined	NS1+	NA	NA	1	72	NG	NA	NG	NA	consistent	13
194	2012-14_104	D2	Serotype determined	NS1+	NA	NA	ND	0	NA	NA	NA	NA	consistent	NA
195	2012-14_104	D3	Serotype determined	NS1+	NA	NA	ND	0	NA	NA	NA	NA	consistent	NA
196	2012-14_104	D4	Serotype determined	NS1+	NA	NA	4	40	D4	D4		Den4:10472:C:G	consistent	15
197	2012-14_105	D1	Serotype determined	NS1+	NA	NA	1	65	D1	D1		Den1:10581:C:G	consistent	72
198	2012-14_105	D2	Serotype determined	NS1+	NA	NA	ND	0	NA	NA	NA	NA	consistent	NA
199	2012-14_105	D3	Serotype determined	NS1+	NA	NA	ND	0	NA	NA	NA	NA	consistent	NA
200	2012-14_105	D4	Serotype determined	NS1+	NA	NA	ND	0	NA	NA	NA	NA	consistent	NA
201	2012-14_109	D1	Serotype determined	IgG+	NA	NA	1	95	D1	D1		Den1:10581:C:G	consistent	23
202	2012-14_109	D2	Serotype determined	IgG+	NA	NA	ND	0	NA	NA	NA	NA	consistent	NA
203	2012-14_109	D3	Serotype determined	IgG+	NA	NA	ND	0	NA	NA	NA	NA	consistent	NA
204	2012-14_109	D4	Serotype determined	IgG+	NA	NA	ND	0	NA	NA	NA	NA	consistent	NA
205	2012-14_111	D1	Serotype determined	IgG+	NA	NA	1	59	D1	NA		NA		425
206	2012-14_111	D2	Serotype determined	IgG+	NA	NA	2	16	NA	NA	NA	NA		NA
207	2012-14_111	D3	Serotype determined	IgG+	NA	NA	3	36	NA	NA	NA	NA		NA
208	2012-14_111	D4	Serotype determined	IgG+	NA	NA	4	31	NA	NA	NA	NA		NA
209	2012-14_115	D1	Serotype determined	NS1+	NA	NA	1	55	D1	NA		NA		295
210	2012-14_115	D2	Serotype determined	NS1+	NA	NA	2	23	NA	NA	NA	NA		NA
211	2012-14_115	D3	Serotype determined	NS1+	NA	NA	3	37	NA	NA	NA	NA		NA
212	2012-14_115	D4	Serotype determined	NS1+	NA	NA	4	25	NA	NA	NA	NA		NA
213	2012-14_125	D1	Serotype determined	NS1+	NA	NA	1	82	D1	D1		Den1:10581:C:G	consistent	38
214	2012-14_125	D2	Serotype determined	NS1+	NA	NA	ND	0	NA	NA	NA	NA	consistent	NA
215	2012-14_125	D3	Serotype determined	NS1+	NA	NA	ND	0	NA	NA	NA	NA	consistent	NA
216	2012-14_125	D4	Serotype determined	NS1+	NA	NA	ND	0	NA	NA	NA	NA	consistent	NA
217	2012-14_132	D1	Serotype determined	NS1+	NA	NA	1	43	D1	D1		Den1:10581:C:G	consistent	37
218	2012-14_132	D2	Serotype determined	NS1+	NA	NA	ND	0	NA	NA	NA	NA	consistent	NA
219	2012-14_132	D3	Serotype determined	NS1+	NA	NA	ND	0	NA	NA	NA	NA	consistent	NA
220	2012-14_132	D4	Serotype determined	NS1+	NA	NA	4	28	NA	NA	NA	NA	consistent	NA
221	2012-14_135	D1	Serotype determined	IgG+	NA	NA	1	45	D1	D1		Den1:10581:C:G	consistent	134
222	2012-14_135	D2	Serotype determined	IgG+	NA	NA	ND	0	NA	NA	NA	NA	consistent	NA
223	2012-14_135	D3	Serotype determined	IgG+	NA	NA	ND	0	NA	NA	NA	NA	consistent	NA
224	2012-14_135	D4	Serotype determined	IgG+	NA	NA	ND	0	NA	NA	NA	NA	consistent	NA
225	2012-14_137	D1	Serotype determined	IgG+	NA	NA	1	20	NA	NA	NA	NA		NA
226	2012-14_137	D2	Serotype determined	IgG+	NA	NA	ND	0	NA	NA	NA	NA		NA
227	2012-14_137	D3	Serotype determined	IgG+	NA	NA	3	86	D3	NA	Den3:10436:A:G	NA		29
228	2012-14_137	D4	Serotype determined	IgG+	NA	NA	4	32	NA	NA	NA	NA		NA
229	2012-14_138	D1	Serotype determined	IgG+	NA	NA	1	39	NA	NA	NA	NA		NA
230	2012-14_138	D2	Serotype determined	IgG+	NA	NA	ND	0	NA	NA	NA	NA		NA
231	2012-14_138	D3	Serotype determined	IgG+	NA	NA	3	86	D3	NA	Den3:10436:A:G	NA		47
232	2012-14_138	D4	Serotype determined	IgG+	NA	NA	4	39	NA	NA	NA	NA		NA
233	2012-14_144	D1	Serotype determined	NS1+	NA	NA	ND	0	NA	NA	NA	NA	consistent	NA
234	2012-14_144	D2	Serotype determined	NS1+	NA	NA	2	35	NA	NA	NA	NA	consistent	NA
235	2012-14_144	D3	Serotype determined	NS1+	NA	NA	3	32	NA	NA	NA	NA	consistent	NA
236	2012-14_144	D4	Serotype determined	NS1+	NA	NA	4	40	D4	D4			consistent	30
237	2012-14_145	D1	Serotype determined	IgG+	NA	NA	ND	0	NA	NA	NA	NA	consistent	NA
238	2012-14_145	D2	Serotype determined	IgG+	NA	NA	2	36	NA	NA	NA	NA	consistent	NA
239	2012-14_145	D3	Serotype determined	IgG+	NA	NA	3	55	D3	D3	Den3:10395:A:G;Den3:10436:A:G	Den3:10395:A:G;Den3:10436:A:G	consistent	75
240	2012-14_145	D4	Serotype determined	IgG+	NA	NA	4	35	NA	NA	NA	NA	consistent	NA
241	2012-14_146	D1	Multiple serotype candidates	IgG+	NA	NA	ND	0	NA	NA	NA	NA	consistent	NA
242	2012-14_146	D2	Multiple serotype candidates	IgG+	NA	NA	2	42	D2	D2	Den2:10553:C:T;Den2:10555:A:G;Den2:10573:G:A	Den2:10553:C:T;Den2:10555:A:G;Den2:10573:G:A	consistent	59
243	2012-14_146	D3	Multiple serotype candidates	IgG+	NA	NA	3	70	D3	D3	Den3:10436:A:G	Den3:10436:A:G	consistent	91
244	2012-14_146	D4	Multiple serotype candidates	IgG+	NA	NA	4	73	D4	D4			consistent	51
245	2012-14_147	D1	Multiple serotype candidates	IgG+	NA	NA	ND	0	NA	NA	NA	NA	inconsistent (human error)	NA
246	2012-14_147	D2	Multiple serotype candidates	IgG+	NA	NA	2	36	NA	NA	NA	NA	inconsistent (human error)	NA
247	2012-14_147	D3	Multiple serotype candidates	IgG+	NA	NA	3	53	D3	D3	Den3:10436:A:G	Den3:10436:A:G;Den3:10466:A:T	inconsistent (human error)	279
248	2012-14_147	D4	Multiple serotype candidates	IgG+	NA	NA	4	71	D4	D3?			inconsistent (human error)	186
249	2012-14_148	D1	Serotype determined	IgG+ IgM+	NA	NA	ND	0	NA	NA	NA	NA	consistent	NA
250	2012-14_148	D2	Serotype determined	IgG+ IgM+	NA	NA	2	29	NA	NA	NA	NA	consistent	NA
251	2012-14_148	D3	Serotype determined	IgG+ IgM+	NA	NA	3	66	NG	NA	NG	NA	consistent	91
252	2012-14_148	D4	Serotype determined	IgG+ IgM+	NA	NA	4	56	D4	D4			consistent	118
253	2012-14_149	D1	Multiple serotype candidates	IgG+	NA	NA	ND	0	NA	NA	NA	NA	consistent	NA
254	2012-14_149	D2	Multiple serotype candidates	IgG+	NA	NA	2	33	NA	NA	NA	NA	consistent	NA
255	2012-14_149	D3	Multiple serotype candidates	IgG+	NA	NA	3	52	D3	D3	Den3:10436:A:G	Den3:10436:A:G	consistent	264
256	2012-14_149	D4	Multiple serotype candidates	IgG+	NA	NA	4	40	D4	D4		Den4:10378:G:T	consistent	295
257	2012-14_150	D1	Serotype determined	IgG+	NA	NA	ND	0	NA	NA	NA	NA	consistent	NA
258	2012-14_150	D2	Serotype determined	IgG+	NA	NA	2	35	NA	NA	NA	NA	consistent	NA
259	2012-14_150	D3	Serotype determined	IgG+	NA	NA	3	38	NA	NA	NA	NA	consistent	NA
260	2012-14_150	D4	Serotype determined	IgG+	NA	NA	4	42	D4	D4		Den4:10378:G:T	consistent	218
261	2012-14_151	D1	Multiple serotype candidates	NS1+	ND	NA	ND	0	NA	NA	NA	NA	inconsistent	NA
262	2012-14_151	D2	Multiple serotype candidates	NS1+	ND	NA	2	37	NA	NA	NA	NA	inconsistent	NA
263	2012-14_151	D3	Multiple serotype candidates	NS1+	ND	NA	3	51	D3	NG		NG	inconsistent	70
264	2012-14_151	D4	Multiple serotype candidates	NS1+	ND	NA	4	47	D4	D4	Den4:10409:G:A		inconsistent	75
265	2012-14_152	D1	Serotype determined	IgM+	NA	NA	ND	0	NA	NA	NA	NA	consistent	NA
266	2012-14_152	D2	Serotype determined	IgM+	NA	NA	2	34	NA	NA	NA	NA	consistent	NA
267	2012-14_152	D3	Serotype determined	IgM+	NA	NA	3	49	D3	D3	Den3:10436:A:G	Den3:10436:A:G	consistent	226
268	2012-14_152	D4	Serotype determined	IgM+	NA	NA	4	41	NG	NA	NG	NA	consistent	50
269	2012-14_153	D1	Serotype determined	NS1+	NA	NA	ND	0	NA	NA	NA	NA		NA
270	2012-14_153	D2	Serotype determined	NS1+	NA	NA	2	37	NA	NA	NA	NA		NA
271	2012-14_153	D3	Serotype determined	NS1+	NA	NA	3	59	D3	NA		NA		222
272	2012-14_153	D4	Serotype determined	NS1+	NA	NA	4	38	NA	NA	NA	NA		NA
273	2012-14_154	D1	Serotype determined	IgG+	NA	NA	1	34	NA	NA	NA	NA		NA
274	2012-14_154	D2	Serotype determined	IgG+	NA	NA	2	29	NA	NA	NA	NA		NA
275	2012-14_154	D3	Serotype determined	IgG+	NA	NA	3	25	NA	NA	NA	NA		NA
276	2012-14_154	D4	Serotype determined	IgG+	NA	NA	4	50	D4	NA		NA		423
277	2012-14_156	D1	Not detected	IgG+	NA	NA	ND	0	NA	NA	NA	NA		NA
278	2012-14_156	D2	Not detected	IgG+	NA	NA	ND	0	NA	NA	NA	NA		NA
279	2012-14_156	D3	Not detected	IgG+	NA	NA	ND	0	NA	NA	NA	NA		NA
280	2012-14_156	D4	Not detected	IgG+	NA	NA	ND	0	NA	NA	NA	NA		NA
281	2012-14_159	D1	Serotype determined	NS1+	NA	NA	1	67	D1	NA		NA		660
282	2012-14_159	D2	Serotype determined	NS1+	NA	NA	2	37	NA	NA	NA	NA		NA
283	2012-14_159	D3	Serotype determined	NS1+	NA	NA	ND	0	NA	NA	NA	NA		NA
284	2012-14_159	D4	Serotype determined	NS1+	NA	NA	ND	0	NA	NA	NA	NA		NA
285	2012-14_162	D1	Serotype determined	NS1+	NA	NA	1	25	NA	NA	NA	NA		NA
286	2012-14_162	D2	Serotype determined	NS1+	NA	NA	2	24	NA	NA	NA	NA		NA
287	2012-14_162	D3	Serotype determined	NS1+	NA	NA	3	54	D3	NA	Den3:10436:A:G	NA		424
288	2012-14_162	D4	Serotype determined	NS1+	NA	NA	4	31	NA	NA	NA	NA		NA
289	2012-14_165	D1	Serotype determined	NS1+	NA	NA	1	84	D1	D1		Den1:10581:C:G	consistent	199
290	2012-14_165	D2	Serotype determined	NS1+	NA	NA	ND	0	NA	NA	NA	NA	consistent	NA
291	2012-14_165	D3	Serotype determined	NS1+	NA	NA	ND	0	NA	NA	NA	NA	consistent	NA
292	2012-14_165	D4	Serotype determined	NS1+	NA	NA	ND	0	NA	NA	NA	NA	consistent	NA
293	2012-14_166	D1	Serotype determined	IgG+	NA	NA	ND	0	NA	NA	NA	NA		NA
294	2012-14_166	D2	Serotype determined	IgG+	NA	NA	2	42	D2	NA	Den2:10553:C:T;Den2:10555:A:G;Den2:10560:A:G;Den2:10573:G:A	NA		100
295	2012-14_166	D3	Serotype determined	IgG+	NA	NA	3	35	NA	NA	NA	NA		NA
296	2012-14_166	D4	Serotype determined	IgG+	NA	NA	4	39	NA	NA	NA	NA		NA
297	2012-14_167	D1	Serotype determined	NS1+	NA	NA	ND	0	NA	NA	NA	NA		NA
298	2012-14_167	D2	Serotype determined	NS1+	NA	NA	2	37	NA	NA	NA	NA		NA
299	2012-14_167	D3	Serotype determined	NS1+	NA	NA	ND	0	NA	NA	NA	NA		NA
300	2012-14_167	D4	Serotype determined	NS1+	NA	NA	4	53	D4	NA	Den4:10387:C:T;Den4:10399:T:G	NA		197
301	2012-14_168	D1	Serotype undetermined	IgG+ IgM+	NA	NA	ND	0	NA	NA	NA	NA		NA
302	2012-14_168	D2	Serotype undetermined	IgG+ IgM+	NA	NA	2	48	NG	NA	NG	NA		5
303	2012-14_168	D3	Serotype undetermined	IgG+ IgM+	NA	NA	ND	0	NA	NA	NA	NA		NA
304	2012-14_168	D4	Serotype undetermined	IgG+ IgM+	NA	NA	ND	0	NA	NA	NA	NA		NA
305	2012-14_169	D1	Serotype determined	IgG+	NA	NA	ND	0	NA	NA	NA	NA		NA
306	2012-14_169	D2	Serotype determined	IgG+	NA	NA	2	36	NA	NA	NA	NA		NA
307	2012-14_169	D3	Serotype determined	IgG+	NA	NA	ND	0	NA	NA	NA	NA		NA
308	2012-14_169	D4	Serotype determined	IgG+	NA	NA	4	49	D4	NA		NA		102
309	2012-14_170	D1	Multiple serotype candidates	IgG+	ND	NA	1	2280	D1	NA		NA		126
310	2012-14_170	D2	Multiple serotype candidates	IgG+	ND	NA	2	310	D2	NA	Den2:10553:C:T;Den2:10555:A:G;Den2:10573:G:A	NA		151
311	2012-14_170	D3	Multiple serotype candidates	IgG+	ND	NA	3	136	D3	NA	Den3:10436:A:G	NA		539
312	2012-14_170	D4	Multiple serotype candidates	IgG+	ND	NA	4	125	NG	NA	NG	NA		473
313	2012-14_171	D1	Serotype determined	NS1+	NA	NA	ND	0	NA	NA	NA	NA		NA
314	2012-14_171	D2	Serotype determined	NS1+	NA	NA	2	27	NA	NA	NA	NA		NA
315	2012-14_171	D3	Serotype determined	NS1+	NA	NA	ND	0	NA	NA	NA	NA		NA
316	2012-14_171	D4	Serotype determined	NS1+	NA	NA	4	45	D4	NA		NA		112
317	2012-14_177	D1	Serotype determined	NS1+	NA	NA	ND	0	NA	NA	NA	NA		NA
318	2012-14_177	D2	Serotype determined	NS1+	NA	NA	2	38	NA	NA	NA	NA		NA
319	2012-14_177	D3	Serotype determined	NS1+	NA	NA	ND	0	NA	NA	NA	NA		NA
320	2012-14_177	D4	Serotype determined	NS1+	NA	NA	4	42	D4	NA		NA		17
321	2012-14_179	D1	Serotype determined	IgG+	NA	NA	1	68	D1	D1		Den1:10581:C:G	consistent	30
322	2012-14_179	D2	Serotype determined	IgG+	NA	NA	ND	0	NA	NA	NA	NA	consistent	NA
323	2012-14_179	D3	Serotype determined	IgG+	NA	NA	ND	0	NA	NA	NA	NA	consistent	NA
324	2012-14_179	D4	Serotype determined	IgG+	NA	NA	ND	0	NA	NA	NA	NA	consistent	NA
325	2012-14_184	D1	Serotype determined	IgG+	NA	NA	1	77	NG	NA	NG	NA	consistent	19
326	2012-14_184	D2	Serotype determined	IgG+	NA	NA	2	47	NG	NA	NG	NA	consistent	1
327	2012-14_184	D3	Serotype determined	IgG+	NA	NA	ND	0	NA	NA	NA	NA	consistent	NA
328	2012-14_184	D4	Serotype determined	IgG+	NA	NA	4	46	D4	D4		Den4:10378:G:T	consistent	33
329	2012-14_189	D1	Serotype determined	IgG+	NA	NA	1	80	D1	D1		Den1:10581:C:G	consistent	63
330	2012-14_189	D2	Serotype determined	IgG+	NA	NA	2	22	NA	NA	NA	NA	consistent	NA
331	2012-14_189	D3	Serotype determined	IgG+	NA	NA	ND	0	NA	NA	NA	NA	consistent	NA
332	2012-14_189	D4	Serotype determined	IgG+	NA	NA	ND	0	NA	NA	NA	NA	consistent	NA
333	2012-14_237	D1	Serotype determined	NS1+	NA	NA	1	77	D1	NA		NA		148
334	2012-14_237	D2	Serotype determined	NS1+	NA	NA	2	39	NA	NA	NA	NA		NA
335	2012-14_237	D3	Serotype determined	NS1+	NA	NA	ND	0	NA	NA	NA	NA		NA
336	2012-14_237	D4	Serotype determined	NS1+	NA	NA	ND	0	NA	NA	NA	NA		NA
337	2012-14_239	D1	Serotype determined	NS1+	NA	NA	1	65	D1	D1		Den1:10581:C:G	consistent	29
338	2012-14_239	D2	Serotype determined	NS1+	NA	NA	2	37	NA	NA	NA	NA	consistent	NA
339	2012-14_239	D3	Serotype determined	NS1+	NA	NA	ND	0	NA	NA	NA	NA	consistent	NA
340	2012-14_239	D4	Serotype determined	NS1+	NA	NA	ND	0	NA	NA	NA	NA	consistent	NA
341	2012-14_243	D1	Serotype determined	IgG+	NA	NA	1	81	D1	D1	Den1:10581:C:G	Den1:10581:C:G	consistent	102
342	2012-14_243	D2	Serotype determined	IgG+	NA	NA	ND	0	NA	NA	NA	NA	consistent	NA
343	2012-14_243	D3	Serotype determined	IgG+	NA	NA	ND	0	NA	NA	NA	NA	consistent	NA
344	2012-14_243	D4	Serotype determined	IgG+	NA	NA	ND	0	NA	NA	NA	NA	consistent	NA
345	2012-14_244	D1	Serotype undetermined	NS1+	NA	NA	1	76	NG	NA	NG	NA		8
346	2012-14_244	D2	Serotype undetermined	NS1+	NA	NA	2	38	NA	NA	NA	NA		NA
347	2012-14_244	D3	Serotype undetermined	NS1+	NA	NA	ND	0	NA	NA	NA	NA		NA
348	2012-14_244	D4	Serotype undetermined	NS1+	NA	NA	ND	0	NA	NA	NA	NA		NA
349	2012-14_247	D1	Multiple serotype candidates	IgG+	NA	NA	1	47	D1	NA		NA		28
350	2012-14_247	D2	Multiple serotype candidates	IgG+	NA	NA	2	40	D2	NA		NA		11
351	2012-14_247	D3	Multiple serotype candidates	IgG+	NA	NA	ND	0	NA	NA	NA	NA		NA
352	2012-14_247	D4	Multiple serotype candidates	IgG+	NA	NA	ND	0	NA	NA	NA	NA		NA
353	2012-14_248	D1	Serotype undetermined	IgG+	NA	NA	1	91	NG	NA	NG	NA		24
354	2012-14_248	D2	Serotype undetermined	IgG+	NA	NA	ND	0	NA	NA	NA	NA		NA
355	2012-14_248	D3	Serotype undetermined	IgG+	NA	NA	ND	0	NA	NA	NA	NA		NA
356	2012-14_248	D4	Serotype undetermined	IgG+	NA	NA	ND	0	NA	NA	NA	NA		NA
357	2012-14_250	D1	Not detected	NS1+	NA	NA	ND	0	NA	NA	NA	NA		NA
358	2012-14_250	D2	Not detected	NS1+	NA	NA	ND	0	NA	NA	NA	NA		NA
359	2012-14_250	D3	Not detected	NS1+	NA	NA	ND	0	NA	NA	NA	NA		NA
360	2012-14_250	D4	Not detected	NS1+	NA	NA	ND	0	NA	NA	NA	NA		NA
361	2012-14_251	D1	Not detected	IgG+	NA	NA	ND	0	NA	NA	NA	NA		NA
362	2012-14_251	D2	Not detected	IgG+	NA	NA	ND	0	NA	NA	NA	NA		NA
363	2012-14_251	D3	Not detected	IgG+	NA	NA	ND	0	NA	NA	NA	NA		NA
364	2012-14_251	D4	Not detected	IgG+	NA	NA	ND	0	NA	NA	NA	NA		NA
365	2012-14_252	D1	Serotype determined	NS1+	1	1	1	501	D1	NA	Den1:10581:C:G	NA		167
366	2012-14_252	D2	Serotype determined	NS1+	ND	NA	ND	0	NA	NA	NA	NA		NA
367	2012-14_252	D3	Serotype determined	NS1+	ND	NA	ND	0	NA	NA	NA	NA		NA
368	2012-14_252	D4	Serotype determined	NS1+	ND	NA	ND	0	NA	NA	NA	NA		NA
369	2012-14_253	D1	Not detected	IgG+	NA	NA	ND	0	NA	NA	NA	NA		NA
370	2012-14_253	D2	Not detected	IgG+	NA	NA	ND	0	NA	NA	NA	NA		NA
371	2012-14_253	D3	Not detected	IgG+	NA	NA	ND	0	NA	NA	NA	NA		NA
372	2012-14_253	D4	Not detected	IgG+	NA	NA	ND	0	NA	NA	NA	NA		NA
373	2012-14_255	D1	Not detected	NS1+	NA	NA	ND	0	NA	NA	NA	NA		NA
374	2012-14_255	D2	Not detected	NS1+	NA	NA	ND	0	NA	NA	NA	NA		NA
375	2012-14_255	D3	Not detected	NS1+	NA	NA	ND	0	NA	NA	NA	NA		NA
376	2012-14_255	D4	Not detected	NS1+	NA	NA	ND	0	NA	NA	NA	NA		NA
377	2012-14_256	D1	Not detected	NS1+	NA	NA	ND	0	NA	NA	NA	NA		NA
378	2012-14_256	D2	Not detected	NS1+	NA	NA	ND	0	NA	NA	NA	NA		NA
379	2012-14_256	D3	Not detected	NS1+	NA	NA	ND	0	NA	NA	NA	NA		NA
380	2012-14_256	D4	Not detected	NS1+	NA	NA	ND	0	NA	NA	NA	NA		NA
381	2012-14_257	D1	Not detected	NS1+	NA	NA	ND	0	NA	NA	NA	NA		NA
382	2012-14_257	D2	Not detected	NS1+	NA	NA	ND	0	NA	NA	NA	NA		NA
383	2012-14_257	D3	Not detected	NS1+	NA	NA	ND	0	NA	NA	NA	NA		NA
384	2012-14_257	D4	Not detected	NS1+	NA	NA	ND	0	NA	NA	NA	NA		NA
385	2012-14_258	D1	Serotype determined	NS1+	1	1	1	202	D1	NA		NA		133
386	2012-14_258	D2	Serotype determined	NS1+	ND	NA	ND	0	NA	NA	NA	NA		NA
387	2012-14_258	D3	Serotype determined	NS1+	ND	NA	ND	0	NA	NA	NA	NA		NA
388	2012-14_258	D4	Serotype determined	NS1+	ND	NA	ND	0	NA	NA	NA	NA		NA
389	2012-14_259	D1	Not detected	NS1+	NA	NA	ND	0	NA	NA	NA	NA		NA
390	2012-14_259	D2	Not detected	NS1+	NA	NA	ND	0	NA	NA	NA	NA		NA
391	2012-14_259	D3	Not detected	NS1+	NA	NA	ND	0	NA	NA	NA	NA		NA
392	2012-14_259	D4	Not detected	NS1+	NA	NA	ND	0	NA	NA	NA	NA		NA
393	2012-14_260	D1	Not detected	NS1+	NA	NA	ND	0	NA	NA	NA	NA		NA
394	2012-14_260	D2	Not detected	NS1+	NA	NA	ND	0	NA	NA	NA	NA		NA
395	2012-14_260	D3	Not detected	NS1+	NA	NA	ND	0	NA	NA	NA	NA		NA
396	2012-14_260	D4	Not detected	NS1+	NA	NA	ND	0	NA	NA	NA	NA		NA
397	2014May_02	D1	Not detected	NA	NA	NA	ND	0	NA	NA	NA	NA		NA
398	2014May_02	D2	Not detected	NA	NA	NA	ND	0	NA	NA	NA	NA		NA
399	2014May_02	D3	Not detected	NA	NA	NA	ND	0	NA	NA	NA	NA		NA
400	2014May_02	D4	Not detected	NA	NA	NA	ND	0	NA	NA	NA	NA		NA
401	2014May_07	D1	Not detected	NA	NA	NA	ND	0	NA	NA	NA	NA		NA
402	2014May_07	D2	Not detected	NA	NA	NA	ND	0	NA	NA	NA	NA		NA
403	2014May_07	D3	Not detected	NA	NA	NA	ND	0	NA	NA	NA	NA		NA
404	2014May_07	D4	Not detected	NA	NA	NA	ND	0	NA	NA	NA	NA		NA
405	2014May_08	D1	Not detected	NA	NA	NA	ND	0	NA	NA	NA	NA		NA
406	2014May_08	D2	Not detected	NA	NA	NA	ND	0	NA	NA	NA	NA		NA
407	2014May_08	D3	Not detected	NA	NA	NA	ND	0	NA	NA	NA	NA		NA
408	2014May_08	D4	Not detected	NA	NA	NA	ND	0	NA	NA	NA	NA		NA
409	2014May_09	D1	Not detected	NA	NA	NA	ND	0	NA	NA	NA	NA		NA
410	2014May_09	D2	Not detected	NA	NA	NA	ND	0	NA	NA	NA	NA		NA
411	2014May_09	D3	Not detected	NA	NA	NA	ND	0	NA	NA	NA	NA		NA
412	2014May_09	D4	Not detected	NA	NA	NA	ND	0	NA	NA	NA	NA		NA
413	2014May_19	D1	Not detected	NA	NA	NA	ND	0	NA	NA	NA	NA		NA
414	2014May_19	D2	Not detected	NA	NA	NA	ND	0	NA	NA	NA	NA		NA
415	2014May_19	D3	Not detected	NA	NA	NA	ND	0	NA	NA	NA	NA		NA
416	2014May_19	D4	Not detected	NA	NA	NA	ND	0	NA	NA	NA	NA		NA
417	2014May_39	D1	Not detected	NA	NA	NA	ND	0	NA	NA	NA	NA		NA
418	2014May_39	D2	Not detected	NA	NA	NA	ND	0	NA	NA	NA	NA		NA
419	2014May_39	D3	Not detected	NA	NA	NA	ND	0	NA	NA	NA	NA		NA
420	2014May_39	D4	Not detected	NA	NA	NA	ND	0	NA	NA	NA	NA		NA
421	2014May_53	D1	Not detected	NA	NA	NA	ND	0	NA	NA	NA	NA		NA
422	2014May_53	D2	Not detected	NA	NA	NA	ND	0	NA	NA	NA	NA		NA
423	2014May_53	D3	Not detected	NA	NA	NA	ND	0	NA	NA	NA	NA		NA
424	2014May_53	D4	Not detected	NA	NA	NA	ND	0	NA	NA	NA	NA		NA
425	2014May_58	D1	Not detected	NA	NA	NA	ND	0	NA	NA	NA	NA		NA
426	2014May_58	D2	Not detected	NA	NA	NA	ND	0	NA	NA	NA	NA		NA
427	2014May_58	D3	Not detected	NA	NA	NA	ND	0	NA	NA	NA	NA		NA
428	2014May_58	D4	Not detected	NA	NA	NA	ND	0	NA	NA	NA	NA		NA
429	2015_B02	D1	Not detected	IgG+	ND	NA	ND	0	NA	NA	NA	NA		NA
430	2015_B02	D2	Not detected	IgG+	ND	NA	ND	0	NA	NA	NA	NA		NA
431	2015_B02	D3	Not detected	IgG+	ND	NA	ND	0	NA	NA	NA	NA		NA
432	2015_B02	D4	Not detected	IgG+	ND	NA	ND	0	NA	NA	NA	NA		NA
433	2015_B12	D1	Not detected	IgG+	ND	NA	ND	0	NA	NA	NA	NA		NA
434	2015_B12	D2	Not detected	IgG+	ND	NA	ND	0	NA	NA	NA	NA		NA
435	2015_B12	D3	Not detected	IgG+	ND	NA	ND	0	NA	NA	NA	NA		NA
436	2015_B12	D4	Not detected	IgG+	ND	NA	ND	0	NA	NA	NA	NA		NA
437	2015_B13	D1	Not detected	IgG+	ND	NA	ND	0	NA	NA	NA	NA		NA
438	2015_B13	D2	Not detected	IgG+	ND	NA	ND	0	NA	NA	NA	NA		NA
439	2015_B13	D3	Not detected	IgG+	ND	NA	ND	0	NA	NA	NA	NA		NA
440	2015_B13	D4	Not detected	IgG+	ND	NA	ND	0	NA	NA	NA	NA		NA
441	2015_B14	D1	Not detected	IgG+	ND	NA	ND	0	NA	NA	NA	NA		NA
442	2015_B14	D2	Not detected	IgG+	ND	NA	ND	0	NA	NA	NA	NA		NA
443	2015_B14	D3	Not detected	IgG+	ND	NA	ND	0	NA	NA	NA	NA		NA
444	2015_B14	D4	Not detected	IgG+	ND	NA	ND	0	NA	NA	NA	NA		NA
445	2015_B15	D1	Serotype determined	NS1+	1	1	1	277	D1	D1	Den1:10581:C:G	Den1:10581:C:G	consistent	334
446	2015_B15	D2	Serotype determined	NS1+	ND	NA	ND	0	NA	NA	NA	NA	consistent	NA
447	2015_B15	D3	Serotype determined	NS1+	ND	NA	ND	0	NA	NA	NA	NA	consistent	NA
448	2015_B15	D4	Serotype determined	NS1+	ND	NA	ND	0	NA	NA	NA	NA	consistent	NA
449	2015_B16	D1	Serotype determined	NS1+	1	1	1	181	D1	D1		Den1:10581:C:G	consistent	329
450	2015_B16	D2	Serotype determined	NS1+	ND	NA	ND	0	NA	NA	NA	NA	consistent	NA
451	2015_B16	D3	Serotype determined	NS1+	ND	NA	ND	0	NA	NA	NA	NA	consistent	NA
452	2015_B16	D4	Serotype determined	NS1+	ND	NA	ND	0	NA	NA	NA	NA	consistent	NA
453	2015_B18	D1	Multiple serotype candidates	NS1+	ND	NA	ND	0	NA	NA	NA	NA		NA
454	2015_B18	D2	Multiple serotype candidates	NS1+	2	2	2	143	D2	NA	Den2:10553:C:T;Den2:10555:A:G;Den2:10559:G:C;Den2:10573:G:A	NA		62
455	2015_B18	D3	Multiple serotype candidates	NS1+	ND	NA	ND	0	NA	NA	NA	NA		NA
456	2015_B18	D4	Multiple serotype candidates	NS1+	ND	NA	4	355	D4	NA	Den4:10398:C:T	NA		115
457	2015_B19	D1	Serotype determined	NS1+	1	NA	1	242	D1	NA		NA		439
458	2015_B19	D2	Serotype determined	NS1+	ND	NA	ND	0	NA	NA	NA	NA		NA
459	2015_B19	D3	Serotype determined	NS1+	ND	NA	ND	0	NA	NA	NA	NA		NA
460	2015_B19	D4	Serotype determined	NS1+	ND	NA	ND	0	NA	NA	NA	NA		NA
461	2015_B21	D1	Not detected	IgG+	ND	NA	ND	0	NA	NA	NA	NA		NA
462	2015_B21	D2	Not detected	IgG+	ND	NA	ND	0	NA	NA	NA	NA		NA
463	2015_B21	D3	Not detected	IgG+	ND	NA	ND	0	NA	NA	NA	NA		NA
464	2015_B21	D4	Not detected	IgG+	ND	NA	ND	0	NA	NA	NA	NA		NA
465	2015_B26	D1	Serotype determined	IgG+	1	NA	1	214	D1	NA		NA		17
466	2015_B26	D2	Serotype determined	IgG+	ND	NA	ND	0	NA	NA	NA	NA		NA
467	2015_B26	D3	Serotype determined	IgG+	ND	NA	3	51	NG	NA	NG	NA		48
468	2015_B26	D4	Serotype determined	IgG+	ND	NA	ND	0	NA	NA	NA	NA		NA
469	2015_B30	D1	Serotype determined	NS1+	ND	NA	ND	0	NA	NA	NA	NA		NA
470	2015_B30	D2	Serotype determined	NS1+	ND	NA	ND	0	NA	NA	NA	NA		NA
471	2015_B30	D3	Serotype determined	NS1+	3	NA	3	419	D3	NA	Den3:10391:T:C	NA		345
472	2015_B30	D4	Serotype determined	NS1+	ND	NA	ND	0	NA	NA	NA	NA		NA
473	2015_B36	D1	Serotype determined	NS1+	ND	NA	1	123	NG	NA	NG	NA		40
474	2015_B36	D2	Serotype determined	NS1+	ND	NA	2	177	NG	NA	NG	NA		8
475	2015_B36	D3	Serotype determined	NS1+	ND	NA	3	162	D3	NA	Den3:10391:T:C	NA		36
476	2015_B36	D4	Serotype determined	NS1+	ND	NA	ND	0	NA	NA	NA	NA		NA
477	2015_B37	D1	Serotype determined	NS1+	ND	NA	1	31	NA	NA	NA	NA		NA
478	2015_B37	D2	Serotype determined	NS1+	ND	NA	ND	0	NA	NA	NA	NA		NA
479	2015_B37	D3	Serotype determined	NS1+	ND	NA	3	59	D3	NA	Den3:10391:T:C;Den3:10431:G:A	NA		713
480	2015_B37	D4	Serotype determined	NS1+	ND	NA	ND	0	NA	NA	NA	NA		NA
481	2015_B38	D1	Serotype undetermined	NS1+	ND	NA	1	91	NG	NA	NG	NA		9
482	2015_B38	D2	Serotype undetermined	NS1+	ND	NA	ND	0	NA	NA	NA	NA		NA
483	2015_B38	D3	Serotype undetermined	NS1+	ND	NA	ND	0	NA	NA	NA	NA		NA
484	2015_B38	D4	Serotype undetermined	NS1+	ND	NA	ND	0	NA	NA	NA	NA		NA
485	2015_B39	D1	Serotype undetermined	NS1+	ND	NA	1	92	NG	NA	NG	NA		12
486	2015_B39	D2	Serotype undetermined	NS1+	ND	NA	ND	0	NA	NA	NA	NA		NA
487	2015_B39	D3	Serotype undetermined	NS1+	ND	NA	ND	0	NA	NA	NA	NA		NA
488	2015_B39	D4	Serotype undetermined	NS1+	ND	NA	ND	0	NA	NA	NA	NA		NA
489	2015_B48	D1	Serotype determined	NS1+	1	1	1	953	D1	NA	Den1:10581:C:G	NA		70
490	2015_B48	D2	Serotype determined	NS1+	ND	NA	ND	0	NA	NA	NA	NA		NA
491	2015_B48	D3	Serotype determined	NS1+	ND	NA	ND	0	NA	NA	NA	NA		NA
492	2015_B48	D4	Serotype determined	NS1+	ND	NA	ND	0	NA	NA	NA	NA		NA
493	2015_B50	D1	Multiple serotype candidates	NS1+	ND	NA	1	290	D1	D1		Den1:10581:C:G	consistent	377
494	2015_B50	D2	Multiple serotype candidates	NS1+	ND	NA	2	206	D2	D2	Den2:10553:C:T;Den2:10555:A:G;Den2:10560:A:G;Den2:10573:G:A	Den2:10553:C:T;Den2:10560:A:G;Den2:10573:G:A	consistent	143
495	2015_B50	D3	Multiple serotype candidates	NS1+	3	3	3	97	D3	D3		Den3:10391:T:C	consistent	863
496	2015_B50	D4	Multiple serotype candidates	NS1+	ND	NA	4	223	D4	D4			consistent	263
497	2015_B55	D1	Serotype determined	NS1+	1	1	1	358	D1	NA		NA		221
498	2015_B55	D2	Serotype determined	NS1+	ND	NA	ND	0	NA	NA	NA	NA		NA
499	2015_B55	D3	Serotype determined	NS1+	ND	NA	ND	0	NA	NA	NA	NA		NA
500	2015_B55	D4	Serotype determined	NS1+	ND	NA	ND	0	NA	NA	NA	NA		NA
501	2015_B56	D1	Serotype determined	NS1+	ND	NA	ND	0	NA	NA	NA	NA		NA
502	2015_B56	D2	Serotype determined	NS1+	ND	NA	ND	0	NA	NA	NA	NA		NA
503	2015_B56	D3	Serotype determined	NS1+	3	3	3	275	D3	NA	Den3:10436:A:G	NA		251
504	2015_B56	D4	Serotype determined	NS1+	ND	NA	ND	0	NA	NA	NA	NA		NA
505	students_03	D1	Serotype determined	ＩｇＧ+	NA	NA	1	88	D1	NG		NG	inconsistent	50
506	students_03	D2	Serotype determined	ＩｇＧ+	NA	NA	ND	0	NA	NA	NA	NA	inconsistent	NA
507	students_03	D3	Serotype determined	ＩｇＧ+	NA	NA	ND	0	NA	NA	NA	NA	inconsistent	NA
508	students_03	D4	Serotype determined	ＩｇＧ+	NA	NA	ND	0	NA	NA	NA	NA	inconsistent	NA
509	students_05	D1	Serotype determined	ＩｇＧ+	NA	NA	1	84	D1	NA		NA		215
510	students_05	D2	Serotype determined	ＩｇＧ+	NA	NA	ND	0	NA	NA	NA	NA		NA
511	students_05	D3	Serotype determined	ＩｇＧ+	NA	NA	ND	0	NA	NA	NA	NA		NA
512	students_05	D4	Serotype determined	ＩｇＧ+	NA	NA	ND	0	NA	NA	NA	NA		NA
513	students_06	D1	Not detected	ＩｇＧ+	NA	NA	ND	0	NA	NA	NA	NA		NA
514	students_06	D2	Not detected	ＩｇＧ+	NA	NA	ND	0	NA	NA	NA	NA		NA
515	students_06	D3	Not detected	ＩｇＧ+	NA	NA	ND	0	NA	NA	NA	NA		NA
516	students_06	D4	Not detected	ＩｇＧ+	NA	NA	ND	0	NA	NA	NA	NA		NA
517	students_08	D1	Serotype determined	ＩｇＧ+	NA	NA	1	49	D1	D1	Den1:10581:C:G	Den1:10581:C:G	consistent	209
518	students_08	D2	Serotype determined	ＩｇＧ+	NA	NA	ND	0	NA	NA	NA	NA	consistent	NA
519	students_08	D3	Serotype determined	ＩｇＧ+	NA	NA	ND	0	NA	NA	NA	NA	consistent	NA
520	students_08	D4	Serotype determined	ＩｇＧ+	NA	NA	ND	0	NA	NA	NA	NA	consistent	NA
521	students_09	D1	Serotype determined	NS1+	NA	NA	1	91	D1	D1	Den1:10581:C:G	Den1:10581:C:G	consistent	79
522	students_09	D2	Serotype determined	NS1+	NA	NA	ND	0	NA	NA	NA	NA	consistent	NA
523	students_09	D3	Serotype determined	NS1+	NA	NA	ND	0	NA	NA	NA	NA	consistent	NA
524	students_09	D4	Serotype determined	NS1+	NA	NA	ND	0	NA	NA	NA	NA	consistent	NA
525	students_11	D1	Serotype determined	NS1+	NA	NA	1	95	D1	D1		Den1:10581:C:G	consistent	33
526	students_11	D2	Serotype determined	NS1+	NA	NA	ND	0	NA	NA	NA	NA	consistent	NA
527	students_11	D3	Serotype determined	NS1+	NA	NA	ND	0	NA	NA	NA	NA	consistent	NA
528	students_11	D4	Serotype determined	NS1+	NA	NA	ND	0	NA	NA	NA	NA	consistent	NA
529	students_14	D1	Serotype determined	ＩｇＧ+	NA	NA	1	74	D1	NA		NA		520
530	students_14	D2	Serotype determined	ＩｇＧ+	NA	NA	ND	0	NA	NA	NA	NA		NA
531	students_14	D3	Serotype determined	ＩｇＧ+	NA	NA	ND	0	NA	NA	NA	NA		NA
532	students_14	D4	Serotype determined	ＩｇＧ+	NA	NA	ND	0	NA	NA	NA	NA		NA
533	students_17	D1	Serotype determined	NS1+	NA	NA	1	95	D1	D1		Den1:10581:C:G	consistent	75
534	students_17	D2	Serotype determined	NS1+	NA	NA	2	39	NA	NA	NA	NA	consistent	NA
535	students_17	D3	Serotype determined	NS1+	NA	NA	ND	0	NA	NA	NA	NA	consistent	NA
536	students_17	D4	Serotype determined	NS1+	NA	NA	ND	0	NA	NA	NA	NA	consistent	NA
537	students_18	D1	Serotype determined	NS1+	NA	NA	1	88	D1	NA	Den1:10581:C:G	NA		305
538	students_18	D2	Serotype determined	NS1+	NA	NA	2	37	NA	NA	NA	NA		NA
539	students_18	D3	Serotype determined	NS1+	NA	NA	ND	0	NA	NA	NA	NA		NA
540	students_18	D4	Serotype determined	NS1+	NA	NA	4	32	NA	NA	NA	NA		NA
541	Suspected_01	D1	Not detected	NS-	ND	NA	ND	0	NA	NA	NA	NA		NA
542	Suspected_01	D2	Not detected	NS-	ND	NA	ND	0	NA	NA	NA	NA		NA
543	Suspected_01	D3	Not detected	NS-	ND	NA	ND	0	NA	NA	NA	NA		NA
544	Suspected_01	D4	Not detected	NS-	ND	NA	ND	0	NA	NA	NA	NA		NA
545	Suspected_02	D1	Not detected	NS-	ND	NA	ND	0	NA	NA	NA	NA		NA
546	Suspected_02	D2	Not detected	NS-	ND	NA	ND	0	NA	NA	NA	NA		NA
547	Suspected_02	D3	Not detected	NS-	ND	NA	ND	0	NA	NA	NA	NA		NA
548	Suspected_02	D4	Not detected	NS-	ND	NA	ND	0	NA	NA	NA	NA		NA
549	Suspected_05	D1	Not detected	NS-	ND	NA	1	7	NA	NA	NA	NA		NA
550	Suspected_05	D2	Not detected	NS-	ND	NA	ND	0	NA	NA	NA	NA		NA
551	Suspected_05	D3	Not detected	NS-	ND	NA	ND	0	NA	NA	NA	NA		NA
552	Suspected_05	D4	Not detected	NS-	ND	NA	ND	0	NA	NA	NA	NA		NA
553	Suspected_17	D1	Not detected	NS-	NA	NA	ND	0	NA	NA	NA	NA		NA
554	Suspected_17	D2	Not detected	NS-	NA	NA	ND	0	NA	NA	NA	NA		NA
555	Suspected_17	D3	Not detected	NS-	NA	NA	ND	0	NA	NA	NA	NA		NA
556	Suspected_17	D4	Not detected	NS-	NA	NA	ND	0	NA	NA	NA	NA		NA
557	Suspected_19	D1	Serotype determined	NS-	NA	NA	1	70	D1	NA		NA		465
558	Suspected_19	D2	Serotype determined	NS-	NA	NA	ND	0	NA	NA	NA	NA		NA
559	Suspected_19	D3	Serotype determined	NS-	NA	NA	ND	0	NA	NA	NA	NA		NA
560	Suspected_19	D4	Serotype determined	NS-	NA	NA	ND	0	NA	NA	NA	NA		NA
561	Suspected_20	D1	Serotype determined	NS-	NA	NA	1	85	D1	NA		NA		184
562	Suspected_20	D2	Serotype determined	NS-	NA	NA	ND	0	NA	NA	NA	NA		NA
563	Suspected_20	D3	Serotype determined	NS-	NA	NA	ND	0	NA	NA	NA	NA		NA
564	Suspected_20	D4	Serotype determined	NS-	NA	NA	ND	0	NA	NA	NA	NA		NA

## Sheet: Vietnam
No.	sample no	sample code	sample type	Examined serotype	Pie chart category	NS1	RT-PCR (NA: not analyzed, ND: not detected)	Sanger (NA: not analyzed)	LAMP (NA: not analyzed, ND: not detected)	LAMP products (ng/ul)	Nanopore	Illumina	Nanopore SNP call	Illumina SNP call	Nanopore Illumina result consistency	# assigned reads
1	1	13S03732	RNA	D1	Serotype determined	( - )	1	1			D1	D1		Den1:10581:C:G	consistent	705
2	1	13S03732	RNA	D2	Serotype determined	( - )	ND	NA			NA	NA	NA	NA	consistent
3	1	13S03732	RNA	D3	Serotype determined	( - )	ND	NA			NA	NA	NA	NA	consistent
4	1	13S03732	RNA	D4	Serotype determined	( - )	ND	NA			NA	NA	NA	NA	consistent
5	1	13S03732	serum	D1	Serotype determined	( - )	1	NA			NA	NG	NA	NG	consistent
6	1	13S03732	serum	D2	Serotype determined	( - )	ND	NA			NA	NA	NA	NA	consistent
7	1	13S03732	serum	D3	Serotype determined	( - )	ND	NA			NA	NA	NA	NA	consistent
8	1	13S03732	serum	D4	Serotype determined	( - )	ND	NA			NA	NA	NA	NA	consistent
9	2	13S03733	RNA	D1	Multiple serotype candidates	( + )	1	1			D1	NG		NG	inconsistent	404
10	2	13S03733	RNA	D2	Multiple serotype candidates	( + )	ND	NA			NA	NA	NA	NA	inconsistent
11	2	13S03733	RNA	D3	Multiple serotype candidates	( + )	ND	NA			NA	NA	NA	NA	inconsistent
12	2	13S03733	RNA	D4	Multiple serotype candidates	( + )	ND	NA			NA	NA	NA	NA	inconsistent
13	2	13S03733	serum	D1	Multiple serotype candidates	( + )	1	NA			D1	NG		NG	inconsistent	317
14	2	13S03733	serum	D2	Multiple serotype candidates	( + )	ND	NA			NG	NA	NG	NA	inconsistent	125
15	2	13S03733	serum	D3	Multiple serotype candidates	( + )	ND	NA			D3	NA		NA	inconsistent	218
16	2	13S03733	serum	D4	Multiple serotype candidates	( + )	ND	NA			NG	NA	NG	NA	inconsistent	14
17	3	13S03737	RNA	D1	Multiple serotype candidates	( + )	1	1			D1	NG		NG	inconsistent	59
18	3	13S03737	RNA	D2	Multiple serotype candidates	( + )	ND	NA			NG	NA	NG	NA	inconsistent	0
19	3	13S03737	RNA	D3	Multiple serotype candidates	( + )	ND	NA			D3	NA		NA	inconsistent	136
20	3	13S03737	RNA	D4	Multiple serotype candidates	( + )	ND	NA			D4	NA		NA	inconsistent	103
21	3	13S03737	serum	D1	Multiple serotype candidates	( + )	1	NA			D1	D1			inconsistent	714
22	3	13S03737	serum	D2	Multiple serotype candidates	( + )	ND	NA			NG	NA	NG	NA	inconsistent	1
23	3	13S03737	serum	D3	Multiple serotype candidates	( + )	ND	NA			NG	NA	NG	NA	inconsistent	25
24	3	13S03737	serum	D4	Multiple serotype candidates	( + )	ND	NA			D4	NA		NA	inconsistent	297
25	4	13S03738	RNA	D1	Serotype determined	( + )	1	1			D1	NG		NG	inconsistent	178
26	4	13S03738	RNA	D2	Serotype determined	( + )	ND	NA			NA	NA	NA	NA	inconsistent
27	4	13S03738	RNA	D3	Serotype determined	( + )	ND	NA			NA	NA	NA	NA	inconsistent
28	4	13S03738	RNA	D4	Serotype determined	( + )	ND	NA			NA	NA	NA	NA	inconsistent
29	4	13S03738	serum	D1	Serotype determined	( + )	1	NA			NA	NA	NA	NA
30	4	13S03738	serum	D2	Serotype determined	( + )	ND	NA			NA	NA	NA	NA
31	4	13S03738	serum	D3	Serotype determined	( + )	ND	NA			NA	NA	NA	NA
32	4	13S03738	serum	D4	Serotype determined	( + )	ND	NA			NA	NA	NA	NA
33	5	13S03740	RNA	D1	Serotype determined	( + )	1	1			D1	D1		Den1:10581:C:G	consistent	489
34	5	13S03740	RNA	D2	Serotype determined	( + )	ND	NA			NA	NA	NA	NA	consistent
35	5	13S03740	RNA	D3	Serotype determined	( + )	ND	NA			NA	NA	NA	NA	consistent
36	5	13S03740	RNA	D4	Serotype determined	( + )	ND	NA			NA	NA	NA	NA	consistent
37	5	13S03740	serum	D1	Serotype determined	( + )	1	NA			D1	NG		NG	inconsistent	321
38	5	13S03740	serum	D2	Serotype determined	( + )	ND	NA			NA	NA	NA	NA	inconsistent
39	5	13S03740	serum	D3	Serotype determined	( + )	ND	NA			NA	NA	NA	NA	inconsistent
40	5	13S03740	serum	D4	Serotype determined	( + )	ND	NA			NA	NA	NA	NA	inconsistent
41	6	13S03799	RNA	D1	Serotype determined	( + )	1	1			D1	NG	Den1:10527:C:T	NG	inconsistent	64
42	6	13S03799	RNA	D2	Serotype determined	( + )	ND	NA			NA	NA	NA	NA	inconsistent
43	6	13S03799	RNA	D3	Serotype determined	( + )	ND	NA			NA	NA	NA	NA	inconsistent
44	6	13S03799	RNA	D4	Serotype determined	( + )	ND	NA			NA	NA	NA	NA	inconsistent
45	6	13S03799	serum	D1	Serotype determined	( + )	1	NA			D1	D1		Den1:10581:C:G	consistent	383
46	6	13S03799	serum	D2	Serotype determined	( + )	ND	NA			NA	NA	NA	NA	consistent
47	6	13S03799	serum	D3	Serotype determined	( + )	ND	NA			NA	NA	NA	NA	consistent
48	6	13S03799	serum	D4	Serotype determined	( + )	ND	NA			NA	NA	NA	NA	consistent
49	7	13S03800	RNA	D1	Serotype determined	( + )	1	1			NG	NG	NG	NG	consistent	18
50	7	13S03800	RNA	D2	Serotype determined	( + )	ND	NA			NA	NA	NA	NA	consistent
51	7	13S03800	RNA	D3	Serotype determined	( + )	ND	NA			NA	NA	NA	NA	consistent
52	7	13S03800	RNA	D4	Serotype determined	( + )	ND	NA			NA	NA	NA	NA	consistent
53	7	13S03800	serum	D1	Serotype determined	( + )	1	NA			D1	NG		NG	inconsistent	1207
54	7	13S03800	serum	D2	Serotype determined	( + )	ND	NA			NA	NA	NA	NA	inconsistent
55	7	13S03800	serum	D3	Serotype determined	( + )	ND	NA			NA	NA	NA	NA	inconsistent
56	7	13S03800	serum	D4	Serotype determined	( + )	ND	NA			NA	NA	NA	NA	inconsistent
57	8	13S03801	RNA	D1	Serotype determined	( + )	1	1			D1	D1		Den1:10581:C:G	consistent	548
58	8	13S03801	RNA	D2	Serotype determined	( + )	ND	NA			NA	NA	NA	NA	consistent
59	8	13S03801	RNA	D3	Serotype determined	( + )	ND	NA			NA	NA	NA	NA	consistent
60	8	13S03801	RNA	D4	Serotype determined	( + )	ND	NA			NA	NA	NA	NA	consistent
61	8	13S03801	serum	D1	Serotype determined	( + )	1	NA			NG	NG	NG	NG	consistent	5
62	8	13S03801	serum	D2	Serotype determined	( + )	ND	NA			NA	NA	NA	NA	consistent
63	8	13S03801	serum	D3	Serotype determined	( + )	ND	NA			NA	NA	NA	NA	consistent
64	8	13S03801	serum	D4	Serotype determined	( + )	ND	NA			NA	NA	NA	NA	consistent
65	9	13S03802	RNA	D1	Serotype determined	( + )	1	1			D1	NG		NG	inconsistent	689
66	9	13S03802	RNA	D2	Serotype determined	( + )	ND	NA			NA	NA	NA	NA	inconsistent
67	9	13S03802	RNA	D3	Serotype determined	( + )	ND	NA			NA	NA	NA	NA	inconsistent
68	9	13S03802	RNA	D4	Serotype determined	( + )	ND	NA			NA	NA	NA	NA	inconsistent
69	9	13S03802	serum	D1	Serotype determined	( + )	1	NA			D1	NG		NG	inconsistent	131
70	9	13S03802	serum	D2	Serotype determined	( + )	ND	NA			NA	NA	NA	NA	inconsistent
71	9	13S03802	serum	D3	Serotype determined	( + )	ND	NA			NA	NA	NA	NA	inconsistent
72	9	13S03802	serum	D4	Serotype determined	( + )	ND	NA			NA	NA	NA	NA	inconsistent
73	10	13S03806	RNA	D1	Serotype determined	( + )	1	NA			D1	D1		Den1:10581:C:G	consistent	434
74	10	13S03806	RNA	D2	Serotype determined	( + )	ND	NA			NA	NA	NA	NA	consistent
75	10	13S03806	RNA	D3	Serotype determined	( + )	ND	NA			NA	NA	NA	NA	consistent
76	10	13S03806	RNA	D4	Serotype determined	( + )	ND	NA			NA	NA	NA	NA	consistent
77	10	13S03806	serum	D1	Serotype determined	( + )	1	NA			D1	NG		NG	inconsistent	58
78	10	13S03806	serum	D2	Serotype determined	( + )	ND	NA			NA	NA	NA	NA	inconsistent
79	10	13S03806	serum	D3	Serotype determined	( + )	ND	NA			NA	NA	NA	NA	inconsistent
80	10	13S03806	serum	D4	Serotype determined	( + )	ND	NA			NA	NA	NA	NA	inconsistent
81	11	13S03812	RNA	D1	Serotype determined	( + )	1	NA			D1	NG		NG	inconsistent	728
82	11	13S03812	RNA	D2	Serotype determined	( + )	ND	NA			NA	NA	NA	NA	inconsistent
83	11	13S03812	RNA	D3	Serotype determined	( + )	ND	NA			NA	NA	NA	NA	inconsistent
84	11	13S03812	RNA	D4	Serotype determined	( + )	ND	NA			NA	NA	NA	NA	inconsistent
85	11	13S03812	serum	D1	Serotype determined	( + )	1	NA			NA	NA	NA	NA
86	11	13S03812	serum	D2	Serotype determined	( + )	ND	NA			NA	NA	NA	NA
87	11	13S03812	serum	D3	Serotype determined	( + )	ND	NA			NA	NA	NA	NA
88	11	13S03812	serum	D4	Serotype determined	( + )	ND	NA			NA	NA	NA	NA
89	12	13S03814	RNA	D1	Serotype determined	( + )	1	NA			D1	NG		NG	inconsistent	136
90	12	13S03814	RNA	D2	Serotype determined	( + )	ND	NA			NA	NA	NA	NA	inconsistent
91	12	13S03814	RNA	D3	Serotype determined	( + )	ND	NA			NA	NA	NA	NA	inconsistent
92	12	13S03814	RNA	D4	Serotype determined	( + )	ND	NA			NA	NA	NA	NA	inconsistent
93	12	13S03814	serum	D1	Serotype determined	( + )	1	NA			D1	NG		NG	inconsistent	714
94	12	13S03814	serum	D2	Serotype determined	( + )	ND	NA			NA	NA	NA	NA	inconsistent
95	12	13S03814	serum	D3	Serotype determined	( + )	ND	NA			NA	NA	NA	NA	inconsistent
96	12	13S03814	serum	D4	Serotype determined	( + )	ND	NA			NA	NA	NA	NA	inconsistent
97	13	13S03834	RNA	D1	Serotype determined	( + )	1	1			D1	D1	Den1:10527:C:T;Den1:10581:C:G		consistent	868
98	13	13S03834	RNA	D2	Serotype determined	( + )	ND	NA			NA	NA	NA	NA	consistent
99	13	13S03834	RNA	D3	Serotype determined	( + )	ND	NA			NA	NA	NA	NA	consistent
100	13	13S03834	RNA	D4	Serotype determined	( + )	ND	NA			NA	NA	NA	NA	consistent
101	13	13S03834	serum	D1	Serotype determined	( + )	1	NA			NG	NG	NG	NG	consistent	104
102	13	13S03834	serum	D2	Serotype determined	( + )	ND	NA			NA	NA	NA	NA	consistent
103	13	13S03834	serum	D3	Serotype determined	( + )	ND	NA			NA	NA	NA	NA	consistent
104	13	13S03834	serum	D4	Serotype determined	( + )	ND	NA			NA	NA	NA	NA	consistent
105	14	13S03847	RNA	D1	Serotype determined	( + )	1	NA			D1	NG		NG	inconsistent	744
106	14	13S03847	RNA	D2	Serotype determined	( + )	ND	NA			NA	NA	NA	NA	inconsistent
107	14	13S03847	RNA	D3	Serotype determined	( + )	ND	NA			NA	NA	NA	NA	inconsistent
108	14	13S03847	RNA	D4	Serotype determined	( + )	ND	NA			NA	NA	NA	NA	inconsistent
109	14	13S03847	serum	D1	Serotype determined	( + )	1	NA			NA	NA	NA	NA
110	14	13S03847	serum	D2	Serotype determined	( + )	ND	NA			NA	NA	NA	NA
111	14	13S03847	serum	D3	Serotype determined	( + )	ND	NA			NA	NA	NA	NA
112	14	13S03847	serum	D4	Serotype determined	( + )	ND	NA			NA	NA	NA	NA
113	15	13S03857	RNA	D1	Serotype determined	( - )	1	1			D1	D1	Den1:10581:C:G	Den1:10581:C:G	consistent	417
114	15	13S03857	RNA	D2	Serotype determined	( - )	ND	NA			NA	NA	NA	NA	consistent
115	15	13S03857	RNA	D3	Serotype determined	( - )	ND	NA			NA	NA	NA	NA	consistent
116	15	13S03857	RNA	D4	Serotype determined	( - )	ND	NA			NA	NA	NA	NA	consistent
117	15	13S03857	serum	D1	Serotype determined	( - )	1	NA			D1	NG		NG	inconsistent	1129
118	15	13S03857	serum	D2	Serotype determined	( - )	ND	NA			NA	NA	NA	NA	inconsistent
119	15	13S03857	serum	D3	Serotype determined	( - )	ND	NA			NA	NA	NA	NA	inconsistent
120	15	13S03857	serum	D4	Serotype determined	( - )	ND	NA			NA	NA	NA	NA	inconsistent
121	16	13S03879	RNA	D1	Serotype determined	( + )	1	1			D1	D1			consistent	163
122	16	13S03879	RNA	D2	Serotype determined	( + )	ND	NA			NA	NA	NA	NA	consistent
123	16	13S03879	RNA	D3	Serotype determined	( + )	ND	NA			NA	NA	NA	NA	consistent
124	16	13S03879	RNA	D4	Serotype determined	( + )	ND	NA			NA	NA	NA	NA	consistent
125	16	13S03879	serum	D1	Serotype determined	( + )	1	NA			D1	NG		NG	inconsistent	273
126	16	13S03879	serum	D2	Serotype determined	( + )	ND	NA			NA	NA	NA	NA	inconsistent
127	16	13S03879	serum	D3	Serotype determined	( + )	ND	NA			NA	NA	NA	NA	inconsistent
128	16	13S03879	serum	D4	Serotype determined	( + )	ND	NA			NA	NA	NA	NA	inconsistent
129	17	13S03880	RNA	D1	Serotype undetermined	( + )	1	1			NG	NG	NG	NG	inconsistent	4
130	17	13S03880	RNA	D2	Serotype undetermined	( + )	ND	NA			NG	NA	NG	NA	inconsistent	0
131	17	13S03880	RNA	D3	Serotype undetermined	( + )	ND	NA			D3	NA		NA	inconsistent	62
132	17	13S03880	RNA	D4	Serotype undetermined	( + )	ND	NA			D4	NA		NA	inconsistent	40
133	17	13S03880	serum	D1	Serotype undetermined	( + )	1	NA			D1	NG		NG	inconsistent	279
134	17	13S03880	serum	D2	Serotype undetermined	( + )	ND	NA			NG	NA	NG	NA	inconsistent	1
135	17	13S03880	serum	D3	Serotype undetermined	( + )	ND	NA			NG	NA	NG	NA	inconsistent	5
136	17	13S03880	serum	D4	Serotype undetermined	( + )	ND	NA			D4	NA		NA	inconsistent	269
137	18	13S03745	RNA	D1	Serotype undetermined	( + )	ND	NA			NA	NA	NA	NA	inconsistent
138	18	13S03745	RNA	D2	Serotype undetermined	( + )	2	2			D2	NG		NG	inconsistent	299
139	18	13S03745	RNA	D3	Serotype undetermined	( + )	ND	NA			NA	NA	NA	NA	inconsistent
140	18	13S03745	RNA	D4	Serotype undetermined	( + )	ND	NA			NA	NA	NA	NA	inconsistent
141	18	13S03745	serum	D1	Serotype undetermined	( + )	ND	NA			NG	NA	NG	NA	inconsistent	0
142	18	13S03745	serum	D2	Serotype undetermined	( + )	2	NA			NG	NG	NG	NG	inconsistent	1
143	18	13S03745	serum	D3	Serotype undetermined	( + )	ND	NA			NG	NA	NG	NA	inconsistent	26
144	18	13S03745	serum	D4	Serotype undetermined	( + )	ND	NA			D4	NA		NA	inconsistent	130
145	19	13S03807	RNA	D1	Multiple serotype candidates	( - )	ND	NA			NA	NA	NA	NA	consistent
146	19	13S03807	RNA	D2	Multiple serotype candidates	( - )	2	NA			NG	NG	NG	NG	consistent	11
147	19	13S03807	RNA	D3	Multiple serotype candidates	( - )	ND	NA			NA	NA	NA	NA	consistent
148	19	13S03807	RNA	D4	Multiple serotype candidates	( - )	ND	NA			NA	NA	NA	NA	consistent
149	19	13S03807	serum	D1	Multiple serotype candidates	( - )	ND	NA			D1	NA		NA	inconsistent	257
150	19	13S03807	serum	D2	Multiple serotype candidates	( - )	2	NA			NG	NG	NG	NG	inconsistent	1501
151	19	13S03807	serum	D3	Multiple serotype candidates	( - )	ND	NA			D3	NA	Den3:10361:A:C	NA	inconsistent	2722
152	19	13S03807	serum	D4	Multiple serotype candidates	( - )	ND	NA			NG	NA	NG	NA	inconsistent	0
153	20	13S03808	RNA	D1	Not detected	( - )	ND	NA			NA	NA	NA	NA	consistent
154	20	13S03808	RNA	D2	Not detected	( - )	2	2			NG	NG	NG	NG	consistent	54
155	20	13S03808	RNA	D3	Not detected	( - )	ND	NA			NA	NA	NA	NA	consistent
156	20	13S03808	RNA	D4	Not detected	( - )	ND	NA			NA	NA	NA	NA	consistent
157	20	13S03808	serum	D1	Not detected	( - )	ND	NA			NA	NA	NA	NA	consistent
158	20	13S03808	serum	D2	Not detected	( - )	2	NA			NG	NG	NG	NG	consistent	7
159	20	13S03808	serum	D3	Not detected	( - )	ND	NA			NA	NA	NA	NA	consistent
160	20	13S03808	serum	D4	Not detected	( - )	ND	NA			NA	NA	NA	NA	consistent
161	21	13S03829	RNA	D1	Not detected	( + )	ND	NA			NA	NA	NA	NA
162	21	13S03829	RNA	D2	Not detected	( + )	2	NA			NA	NA	NA	NA
163	21	13S03829	RNA	D3	Not detected	( + )	ND	NA			NA	NA	NA	NA
164	21	13S03829	RNA	D4	Not detected	( + )	ND	NA			NA	NA	NA	NA
165	21	13S03829	serum	D1	Not detected	( + )	ND	NA			NA	NA	NA	NA	consistent
166	21	13S03829	serum	D2	Not detected	( + )	2	NA			NG	NG	NG	NG	consistent	0
167	21	13S03829	serum	D3	Not detected	( + )	ND	NA			NA	NA	NA	NA	consistent
168	21	13S03829	serum	D4	Not detected	( + )	ND	NA			NA	NA	NA	NA	consistent
169	22	13S03835	RNA	D1	Not detected	( + )	ND	NA			NA	NA	NA	NA	consistent
170	22	13S03835	RNA	D2	Not detected	( + )	2	2			NG	NG	NG	NG	consistent	104
171	22	13S03835	RNA	D3	Not detected	( + )	ND	NA			NA	NA	NA	NA	consistent
172	22	13S03835	RNA	D4	Not detected	( + )	ND	NA			NA	NA	NA	NA	consistent
173	22	13S03835	serum	D1	Not detected	( + )	ND	NA			NA	NA	NA	NA
174	22	13S03835	serum	D2	Not detected	( + )	2	NA			NA	NA	NA	NA
175	22	13S03835	serum	D3	Not detected	( + )	ND	NA			NA	NA	NA	NA
176	22	13S03835	serum	D4	Not detected	( + )	ND	NA			NA	NA	NA	NA
177	23	13S03848	RNA	D1	Not detected	( + )	ND	NA			NA	NA	NA	NA	consistent
178	23	13S03848	RNA	D2	Not detected	( + )	2	2			NG	NG	NG	NG	consistent	86
179	23	13S03848	RNA	D3	Not detected	( + )	ND	NA			NA	NA	NA	NA	consistent
180	23	13S03848	RNA	D4	Not detected	( + )	ND	NA			NA	NA	NA	NA	consistent
181	23	13S03848	serum	D1	Not detected	( + )	ND	NA			NG	NA	NG	NA	consistent	0
182	23	13S03848	serum	D2	Not detected	( + )	2	NA			NG	NA	NG	NA	consistent	0
183	23	13S03848	serum	D3	Not detected	( + )	ND	NA			NG	NA	NG	NA	consistent	12
184	23	13S03848	serum	D4	Not detected	( + )	ND	NA			NG	NA	NG	NA	consistent	3
185	24	13S03873	RNA	D1	Serotype determined	( + )	ND	NA			NA	NA	NA	NA	inconsistent
186	24	13S03873	RNA	D2	Serotype determined	( + )	2	2			D2	NG	Den2:10553:C:T;Den2:10555:A:G;Den2:10570:C:T;Den2:10573:G:A	NG	inconsistent	149
187	24	13S03873	RNA	D3	Serotype determined	( + )	ND	NA			NA	NA	NA	NA	inconsistent
188	24	13S03873	RNA	D4	Serotype determined	( + )	ND	NA			NA	NA	NA	NA	inconsistent
189	24	13S03873	serum	D1	Serotype determined	( + )	ND	NA			NA	NA	NA	NA	consistent
190	24	13S03873	serum	D2	Serotype determined	( + )	2	NA			NG	NG	NG	NG	consistent	2
191	24	13S03873	serum	D3	Serotype determined	( + )	ND	NA			NA	NA	NA	NA	consistent
192	24	13S03873	serum	D4	Serotype determined	( + )	ND	NA			NA	NA	NA	NA	consistent
193	25	13S03734	RNA	D1	Serotype determined	( + )	ND	NA			NA	NA	NA	NA	inconsistent
194	25	13S03734	RNA	D2	Serotype determined	( + )	ND	NA			NA	NA	NA	NA	inconsistent
195	25	13S03734	RNA	D3	Serotype determined	( + )	3	3			D3	NG	Den3:10436:A:G	NG	inconsistent	830
196	25	13S03734	RNA	D4	Serotype determined	( + )	ND	NA			NA	NA	NA	NA	inconsistent
197	25	13S03734	serum	D1	Serotype determined	( + )	ND	NA			NA	NA	NA	NA	inconsistent
198	25	13S03734	serum	D2	Serotype determined	( + )	ND	NA			NA	NA	NA	NA	inconsistent
199	25	13S03734	serum	D3	Serotype determined	( + )	3	NA			D3	NG		NG	inconsistent	1493
200	25	13S03734	serum	D4	Serotype determined	( + )	ND	NA			NA	NA	NA	NA	inconsistent
201	26	13S03735	RNA	D1	Serotype determined	( - )	ND	NA			NA	NA	NA	NA	consistent
202	26	13S03735	RNA	D2	Serotype determined	( - )	ND	NA			NA	NA	NA	NA	consistent
203	26	13S03735	RNA	D3	Serotype determined	( - )	3	NA			D3	D3			consistent	91
204	26	13S03735	RNA	D4	Serotype determined	( - )	ND	NA			NA	NA	NA	NA	consistent
205	26	13S03735	serum	D1	Serotype determined	( - )	ND	NA			NA	NA	NA	NA
206	26	13S03735	serum	D2	Serotype determined	( - )	ND	NA			NA	NA	NA	NA
207	26	13S03735	serum	D3	Serotype determined	( - )	3	NA			NA	NA	NA	NA
208	26	13S03735	serum	D4	Serotype determined	( - )	ND	NA			NA	NA	NA	NA
209	27	13S03743	RNA	D1	Serotype determined	( + )	ND	NA			NA	NA	NA	NA	inconsistent
210	27	13S03743	RNA	D2	Serotype determined	( + )	ND	NA			NA	NA	NA	NA	inconsistent
211	27	13S03743	RNA	D3	Serotype determined	( + )	3	NA			D3	NG		NG	inconsistent	56
212	27	13S03743	RNA	D4	Serotype determined	( + )	ND	NA			NA	NA	NA	NA	inconsistent
213	27	13S03743	serum	D1	Serotype determined	( + )	ND	NA			NA	NA	NA	NA	consistent
214	27	13S03743	serum	D2	Serotype determined	( + )	ND	NA			NA	NA	NA	NA	consistent
215	27	13S03743	serum	D3	Serotype determined	( + )	3	NA			NG	NG	NG	NG	consistent	191
216	27	13S03743	serum	D4	Serotype determined	( + )	ND	NA			NA	NA	NA	NA	consistent
217	28	13S03746	RNA	D1	Serotype determined	( - )	ND	NA			NA	NA	NA	NA	consistent
218	28	13S03746	RNA	D2	Serotype determined	( - )	ND	NA			NA	NA	NA	NA	consistent
219	28	13S03746	RNA	D3	Serotype determined	( - )	3	3			D3	D3	Den3:10436:A:G	Den3:10436:A:G	consistent	66
220	28	13S03746	RNA	D4	Serotype determined	( - )	ND	NA			NA	NA	NA	NA	consistent
221	28	13S03746	serum	D1	Serotype determined	( - )	ND	NA			NA	NA	NA	NA	consistent
222	28	13S03746	serum	D2	Serotype determined	( - )	ND	NA			NA	NA	NA	NA	consistent
223	28	13S03746	serum	D3	Serotype determined	( - )	3	NA			D3	D3	Den3:10436:A:G	Den3:10436:A:G	consistent	2745
224	28	13S03746	serum	D4	Serotype determined	( - )	ND	NA			NA	NA	NA	NA	consistent
225	29	13S03755	RNA	D1	Serotype determined	( + )	ND	NA			NA	NA	NA	NA	inconsistent
226	29	13S03755	RNA	D2	Serotype determined	( + )	ND	NA			NA	NA	NA	NA	inconsistent
227	29	13S03755	RNA	D3	Serotype determined	( + )	3	3			D3	NG		NG	inconsistent	37
228	29	13S03755	RNA	D4	Serotype determined	( + )	ND	NA			NA	NA	NA	NA	inconsistent
229	29	13S03755	serum	D1	Serotype determined	( + )	ND	NA			NA	NA	NA	NA	inconsistent
230	29	13S03755	serum	D2	Serotype determined	( + )	ND	NA			NA	NA	NA	NA	inconsistent
231	29	13S03755	serum	D3	Serotype determined	( + )	3	NA			D3	NG		NG	inconsistent	1865
232	29	13S03755	serum	D4	Serotype determined	( + )	ND	NA			NA	NA	NA	NA	inconsistent
233	30	13S03761	RNA	D1	Serotype determined	( - )	ND	NA			NA	NA	NA	NA	inconsistent
234	30	13S03761	RNA	D2	Serotype determined	( - )	ND	NA			NA	NA	NA	NA	inconsistent
235	30	13S03761	RNA	D3	Serotype determined	( - )	3	NA			D3	NG		NG	inconsistent	151
236	30	13S03761	RNA	D4	Serotype determined	( - )	ND	NA			NA	NA	NA	NA	inconsistent
237	30	13S03761	serum	D1	Serotype determined	( - )	ND	NA			NA	NA	NA	NA	inconsistent
238	30	13S03761	serum	D2	Serotype determined	( - )	ND	NA			NA	NA	NA	NA	inconsistent
239	30	13S03761	serum	D3	Serotype determined	( - )	3	NA			D3	NG		NG	inconsistent	1648
240	30	13S03761	serum	D4	Serotype determined	( - )	ND	NA			NA	NA	NA	NA	inconsistent
241	31	13S03763	RNA	D1	Serotype undetermined	( - )	ND	NA			NG	NA	NG	NA	consistent	1
242	31	13S03763	RNA	D2	Serotype undetermined	( - )	ND	NA			NG	NA	NG	NA	consistent	0
243	31	13S03763	RNA	D3	Serotype undetermined	( - )	3	3			D3	D3	Den3:10436:A:G	Den3:10436:A:G	consistent	76
244	31	13S03763	RNA	D4	Serotype undetermined	( - )	ND	NA			NG	NA	NG	NA	consistent	1
245	31	13S03763	serum	D1	Serotype undetermined	( - )	ND	NA			D1	NA		NA	inconsistent	73
246	31	13S03763	serum	D2	Serotype undetermined	( - )	ND	NA			NG	NA	NG	NA	inconsistent	16
247	31	13S03763	serum	D3	Serotype undetermined	( - )	3	NA			NG	NG	NG	NG	inconsistent	2138
248	31	13S03763	serum	D4	Serotype undetermined	( - )	ND	NA			D4	NA	Den4:10388:G:T	NA	inconsistent	57
249	32	13S03764	RNA	D1	Multiple serotype candidates	( + )	ND	NA			NG	NA	NG	NA	inconsistent	2
250	32	13S03764	RNA	D2	Multiple serotype candidates	( + )	ND	NA			NG	NA	NG	NA	inconsistent	0
251	32	13S03764	RNA	D3	Multiple serotype candidates	( + )	3	3			D3	D3	Den3:10436:A:G	Den3:10436:A:G	inconsistent	90
252	32	13S03764	RNA	D4	Multiple serotype candidates	( + )	ND	NA			D4	NA		NA	inconsistent	151
253	32	13S03764	serum	D1	Multiple serotype candidates	( + )	ND	NA			NA	NA	NA	NA	consistent
254	32	13S03764	serum	D2	Multiple serotype candidates	( + )	ND	NA			NA	NA	NA	NA	consistent
255	32	13S03764	serum	D3	Multiple serotype candidates	( + )	3	NA			NG	NG	NG	NG	consistent	17
256	32	13S03764	serum	D4	Multiple serotype candidates	( + )	ND	NA			NA	NA	NA	NA	consistent
257	33	13S03765	RNA	D1	Serotype determined	( - )	ND	NA			NA	NA	NA	NA	inconsistent
258	33	13S03765	RNA	D2	Serotype determined	( - )	ND	NA			NA	NA	NA	NA	inconsistent
259	33	13S03765	RNA	D3	Serotype determined	( - )	3	NA			D3	NG		NG	inconsistent	1128
260	33	13S03765	RNA	D4	Serotype determined	( - )	ND	NA			NA	NA	NA	NA	inconsistent
261	33	13S03765	serum	D1	Serotype determined	( - )	ND	NA			NA	NA	NA	NA	consistent
262	33	13S03765	serum	D2	Serotype determined	( - )	ND	NA			NA	NA	NA	NA	consistent
263	33	13S03765	serum	D3	Serotype determined	( - )	3	NA			NG	NG	NG	NG	consistent	211
264	33	13S03765	serum	D4	Serotype determined	( - )	ND	NA			NA	NA	NA	NA	consistent
265	34	13S03770	RNA	D1	Serotype determined	( + )	ND	NA			NA	NA	NA	NA	consistent
266	34	13S03770	RNA	D2	Serotype determined	( + )	ND	NA			NA	NA	NA	NA	consistent
267	34	13S03770	RNA	D3	Serotype determined	( + )	3	3			NG	NG	NG	NG	consistent	140
268	34	13S03770	RNA	D4	Serotype determined	( + )	ND	NA			NA	NA	NA	NA	consistent
269	34	13S03770	serum	D1	Serotype determined	( + )	ND	NA			NA	NA	NA	NA	consistent
270	34	13S03770	serum	D2	Serotype determined	( + )	ND	NA			NA	NA	NA	NA	consistent
271	34	13S03770	serum	D3	Serotype determined	( + )	3	NA			D3	D3	Den3:10436:A:G	Den3:10436:A:G	consistent	1026
272	34	13S03770	serum	D4	Serotype determined	( + )	ND	NA			NA	NA	NA	NA	consistent
273	35	13S03771	RNA	D1	Serotype determined	( + )	ND	NA			NA	NA	NA	NA	consistent
274	35	13S03771	RNA	D2	Serotype determined	( + )	ND	NA			NA	NA	NA	NA	consistent
275	35	13S03771	RNA	D3	Serotype determined	( + )	3	3			NG	NG	NG	NG	consistent	12
276	35	13S03771	RNA	D4	Serotype determined	( + )	ND	NA			NA	NA	NA	NA	consistent
277	35	13S03771	serum	D1	Serotype determined	( + )	ND	NA			NA	NA	NA	NA	inconsistent
278	35	13S03771	serum	D2	Serotype determined	( + )	ND	NA			NA	NA	NA	NA	inconsistent
279	35	13S03771	serum	D3	Serotype determined	( + )	3	NA			D3	NG		NG	inconsistent	799
280	35	13S03771	serum	D4	Serotype determined	( + )	ND	NA			NA	NA	NA	NA	inconsistent
281	36	13S03775	RNA	D1	Not detected	( + )	ND	NA			NA	NA	NA	NA	consistent
282	36	13S03775	RNA	D2	Not detected	( + )	ND	NA			NA	NA	NA	NA	consistent
283	36	13S03775	RNA	D3	Not detected	( + )	3	NA			NG	NG	NG	NG	consistent	146
284	36	13S03775	RNA	D4	Not detected	( + )	ND	NA			NA	NA	NA	NA	consistent
285	36	13S03775	serum	D1	Not detected	( + )	ND	NA			NA	NA	NA	NA
286	36	13S03775	serum	D2	Not detected	( + )	ND	NA			NA	NA	NA	NA
287	36	13S03775	serum	D3	Not detected	( + )	3	NA			NA	NA	NA	NA
288	36	13S03775	serum	D4	Not detected	( + )	ND	NA			NA	NA	NA	NA
289	37	13S03776	RNA	D1	Multiple serotype candidates	( + )	ND	NA			NA	NA	NA	NA	inconsistent
290	37	13S03776	RNA	D2	Multiple serotype candidates	( + )	ND	NA			NA	NA	NA	NA	inconsistent
291	37	13S03776	RNA	D3	Multiple serotype candidates	( + )	3	3			D3	NG		NG	inconsistent	761
292	37	13S03776	RNA	D4	Multiple serotype candidates	( + )	ND	NA			NA	NA	NA	NA	inconsistent
293	37	13S03776	serum	D1	Multiple serotype candidates	( + )	ND	NA			NG	NA	NG	NA	inconsistent	0
294	37	13S03776	serum	D2	Multiple serotype candidates	( + )	ND	NA			NG	NA	NG	NA	inconsistent	7
295	37	13S03776	serum	D3	Multiple serotype candidates	( + )	3	NA			D3	D3	Den3:10436:A:G	Den3:10436:A:G	inconsistent	1444
296	37	13S03776	serum	D4	Multiple serotype candidates	( + )	ND	NA			D4	NA	Den4:10388:G:T	NA	inconsistent	183
297	38	13S03780	RNA	D1	Multiple serotype candidates	( - )	ND	NA			D1	NA		NA	inconsistent	64
298	38	13S03780	RNA	D2	Multiple serotype candidates	( - )	ND	NA			NG	NA	NG	NA	inconsistent	0
299	38	13S03780	RNA	D3	Multiple serotype candidates	( - )	3	3			D3	D3		Den3:10436:A:G	inconsistent	88
300	38	13S03780	RNA	D4	Multiple serotype candidates	( - )	ND	NA			D4	NA		NA	inconsistent	89
301	38	13S03780	serum	D1	Multiple serotype candidates	( - )	ND	NA			NA	NA	NA	NA	inconsistent
302	38	13S03780	serum	D2	Multiple serotype candidates	( - )	ND	NA			NA	NA	NA	NA	inconsistent
303	38	13S03780	serum	D3	Multiple serotype candidates	( - )	3	NA			D3	NG		NG	inconsistent	571
304	38	13S03780	serum	D4	Multiple serotype candidates	( - )	ND	NA			NA	NA	NA	NA	inconsistent
305	39	13S03789	RNA	D1	Multiple serotype candidates	( + )	ND	NA			D1	NA		NA	inconsistent	58
306	39	13S03789	RNA	D2	Multiple serotype candidates	( + )	ND	NA			NG	NA	NG	NA	inconsistent	0
307	39	13S03789	RNA	D3	Multiple serotype candidates	( + )	3	3			D3	D3	Den3:10436:A:G	Den3:10436:A:G	inconsistent	55
308	39	13S03789	RNA	D4	Multiple serotype candidates	( + )	ND	NA			D4	NA		NA	inconsistent	74
309	39	13S03789	serum	D1	Multiple serotype candidates	( + )	ND	NA			NA	NA	NA	NA
310	39	13S03789	serum	D2	Multiple serotype candidates	( + )	ND	NA			NA	NA	NA	NA
311	39	13S03789	serum	D3	Multiple serotype candidates	( + )	3	NA			NA	NA	NA	NA
312	39	13S03789	serum	D4	Multiple serotype candidates	( + )	ND	NA			NA	NA	NA	NA
313	40	13S03791	RNA	D1	Serotype determined	( - )	ND	NA			NA	NA	NA	NA	inconsistent
314	40	13S03791	RNA	D2	Serotype determined	( - )	ND	NA			NA	NA	NA	NA	inconsistent
315	40	13S03791	RNA	D3	Serotype determined	( - )	3	NA			D3	NG		NG	inconsistent	132
316	40	13S03791	RNA	D4	Serotype determined	( - )	ND	NA			NA	NA	NA	NA	inconsistent
317	40	13S03791	serum	D1	Serotype determined	( - )	ND	NA			NA	NA	NA	NA	inconsistent
318	40	13S03791	serum	D2	Serotype determined	( - )	ND	NA			NA	NA	NA	NA	inconsistent
319	40	13S03791	serum	D3	Serotype determined	( - )	3	ND			D3	NG		NG	inconsistent	828
320	40	13S03791	serum	D4	Serotype determined	( - )	ND	NA			NA	NA	NA	NA	inconsistent
321	41	13S03792	RNA	D1	Serotype determined	( + )	ND	NA			NA	NA	NA	NA	consistent
322	41	13S03792	RNA	D2	Serotype determined	( + )	ND	NA			NA	NA	NA	NA	consistent
323	41	13S03792	RNA	D3	Serotype determined	( + )	3	3			D3	D3	Den3:10436:A:G	Den3:10436:A:G	consistent	212
324	41	13S03792	RNA	D4	Serotype determined	( + )	ND	NA			NA	NA	NA	NA	consistent
325	41	13S03792	serum	D1	Serotype determined	( + )	ND	NA			NA	NA	NA	NA	consistent
326	41	13S03792	serum	D2	Serotype determined	( + )	ND	NA			NA	NA	NA	NA	consistent
327	41	13S03792	serum	D3	Serotype determined	( + )	3	NA			NG	NG	NG	NG	consistent	0
328	41	13S03792	serum	D4	Serotype determined	( + )	ND	NA			NA	NA	NA	NA	consistent
329	42	13S03805	RNA	D1	Not detected	( + )	ND	NA			NA	NA	NA	NA	consistent
330	42	13S03805	RNA	D2	Not detected	( + )	ND	NA			NA	NA	NA	NA	consistent
331	42	13S03805	RNA	D3	Not detected	( + )	3	NA			NG	NG	NG	NG	consistent	91
332	42	13S03805	RNA	D4	Not detected	( + )	ND	NA			NA	NA	NA	NA	consistent
333	42	13S03805	serum	D1	Not detected	( + )	ND	NA			NA	NA	NA	NA	consistent
334	42	13S03805	serum	D2	Not detected	( + )	ND	NA			NA	NA	NA	NA	consistent
335	42	13S03805	serum	D3	Not detected	( + )	3	NA			NG	NG	NG	NG	consistent	151
336	42	13S03805	serum	D4	Not detected	( + )	ND	NA			NA	NA	NA	NA	consistent
337	43	13S03810	RNA	D1	Multiple serotype candidates	( + )	ND	NA			D1	NA	Den1:10551:G:A	NA	inconsistent	82
338	43	13S03810	RNA	D2	Multiple serotype candidates	( + )	ND	NA			NG	NA	NG	NA	inconsistent	0
339	43	13S03810	RNA	D3	Multiple serotype candidates	( + )	3	3			NG	D3	NG	Den3:10436:A:G	inconsistent	0
340	43	13S03810	RNA	D4	Multiple serotype candidates	( + )	ND	NA			D4	NA		NA	inconsistent	103
341	43	13S03810	serum	D1	Multiple serotype candidates	( + )	ND	NA			NA	NA	NA	NA	consistent
342	43	13S03810	serum	D2	Multiple serotype candidates	( + )	ND	NA			NA	NA	NA	NA	consistent
343	43	13S03810	serum	D3	Multiple serotype candidates	( + )	3	NA			NG	NG	NG	NG	consistent	227
344	43	13S03810	serum	D4	Multiple serotype candidates	( + )	ND	NA			NA	NA	NA	NA	consistent
345	44	13S03813	RNA	D1	Serotype determined	( + )	ND	NA			NA	NA	NA	NA	consistent
346	44	13S03813	RNA	D2	Serotype determined	( + )	ND	NA			NA	NA	NA	NA	consistent
347	44	13S03813	RNA	D3	Serotype determined	( + )	3	3			NG	NG	NG	NG	consistent	2
348	44	13S03813	RNA	D4	Serotype determined	( + )	ND	NA			NA	NA	NA	NA	consistent
349	44	13S03813	serum	D1	Serotype determined	( + )	ND	NA			NA	NA	NA	NA	inconsistent
350	44	13S03813	serum	D2	Serotype determined	( + )	ND	NA			NA	NA	NA	NA	inconsistent
351	44	13S03813	serum	D3	Serotype determined	( + )	3	NA			D3	NG		NG	inconsistent	214
352	44	13S03813	serum	D4	Serotype determined	( + )	ND	NA			NA	NA	NA	NA	inconsistent
353	45	13S03815	RNA	D1	Not detected	( + )	ND	NA			NA	NA	NA	NA	consistent
354	45	13S03815	RNA	D2	Not detected	( + )	ND	NA			NA	NA	NA	NA	consistent
355	45	13S03815	RNA	D3	Not detected	( + )	3	NA			NG	NG	NG	NG	consistent	24
356	45	13S03815	RNA	D4	Not detected	( + )	ND	NA			NA	NA	NA	NA	consistent
357	45	13S03815	serum	D1	Not detected	( + )	ND	NA			NA	NA	NA	NA	consistent
358	45	13S03815	serum	D2	Not detected	( + )	ND	NA			NA	NA	NA	NA	consistent
359	45	13S03815	serum	D3	Not detected	( + )	3	NA			NG	NG	NG	NG	consistent	167
360	45	13S03815	serum	D4	Not detected	( + )	ND	NA			NA	NA	NA	NA	consistent
361	46	13S03818	RNA	D1	Serotype determined	( + )	ND	NA			NA	NA	NA	NA	consistent
362	46	13S03818	RNA	D2	Serotype determined	( + )	ND	NA			NA	NA	NA	NA	consistent
363	46	13S03818	RNA	D3	Serotype determined	( + )	3	3			NG	NG	NG	NG	consistent	7
364	46	13S03818	RNA	D4	Serotype determined	( + )	ND	NA			NA	NA	NA	NA	consistent
365	46	13S03818	serum	D1	Serotype determined	( + )	ND	NA			NA	NA	NA	NA	consistent
366	46	13S03818	serum	D2	Serotype determined	( + )	ND	NA			NA	NA	NA	NA	consistent
367	46	13S03818	serum	D3	Serotype determined	( + )	3	NA			D3	D3	Den3:10436:A:G	Den3:10436:A:G	consistent	454
368	46	13S03818	serum	D4	Serotype determined	( + )	ND	NA			NA	NA	NA	NA	consistent
369	47	13S03819	RNA	D1	Serotype determined	( + )	ND	NA			NA	NA	NA	NA	consistent
370	47	13S03819	RNA	D2	Serotype determined	( + )	ND	NA			NA	NA	NA	NA	consistent
371	47	13S03819	RNA	D3	Serotype determined	( + )	3	NA			NG	NG	NG	NG	consistent	35
372	47	13S03819	RNA	D4	Serotype determined	( + )	ND	NA			NA	NA	NA	NA	consistent
373	47	13S03819	serum	D1	Serotype determined	( + )	ND	NA			NA	NA	NA	NA	inconsistent
374	47	13S03819	serum	D2	Serotype determined	( + )	ND	NA			NA	NA	NA	NA	inconsistent
375	47	13S03819	serum	D3	Serotype determined	( + )	3	NA			D3	NG		NG	inconsistent	1146
376	47	13S03819	serum	D4	Serotype determined	( + )	ND	NA			NA	NA	NA	NA	inconsistent
377	48	13S03821	RNA	D1	Multiple serotype candidates	( + )	ND	NA			NG	NA	NG	NA	inconsistent	10
378	48	13S03821	RNA	D2	Multiple serotype candidates	( + )	ND	NA			NG	NA	NG	NA	inconsistent	0
379	48	13S03821	RNA	D3	Multiple serotype candidates	( + )	3	NA			D3	NG		NG	inconsistent	69
380	48	13S03821	RNA	D4	Multiple serotype candidates	( + )	ND	NA			D4	NA		NA	inconsistent	123
381	48	13S03821	serum	D1	Multiple serotype candidates	( + )	ND	NA			NA	NA	NA	NA	consistent
382	48	13S03821	serum	D2	Multiple serotype candidates	( + )	ND	NA			NA	NA	NA	NA	consistent
383	48	13S03821	serum	D3	Multiple serotype candidates	( + )	3	NA			NG	NG	NG	NG	consistent	3
384	48	13S03821	serum	D4	Multiple serotype candidates	( + )	ND	NA			NA	NA	NA	NA	consistent
385	49	13S03827	RNA	D1	Multiple serotype candidates	( + )	ND	NA			D1	NA	Den1:10527:C:T;Den1:10581:C:G	NA	inconsistent	51
386	49	13S03827	RNA	D2	Multiple serotype candidates	( + )	ND	NA			NG	NA	NG	NA	inconsistent	0
387	49	13S03827	RNA	D3	Multiple serotype candidates	( + )	3	3			D3	D3	Den3:10436:A:G	Den3:10436:A:G	inconsistent	39
388	49	13S03827	RNA	D4	Multiple serotype candidates	( + )	ND	NA			D4	NA		NA	inconsistent	63
389	49	13S03827	serum	D1	Multiple serotype candidates	( + )	ND	NA			NG	NA	NG	NA	inconsistent	171
390	49	13S03827	serum	D2	Multiple serotype candidates	( + )	ND	NA			NG	NA	NG	NA	inconsistent	0
391	49	13S03827	serum	D3	Multiple serotype candidates	( + )	3	NA			D3	NG		NG	inconsistent	96
392	49	13S03827	serum	D4	Multiple serotype candidates	( + )	ND	NA			D4	NA		NA	inconsistent	24
393	50	13S03828	RNA	D1	Serotype determined	( + )	ND	NA			NA	NA	NA	NA	consistent
394	50	13S03828	RNA	D2	Serotype determined	( + )	ND	NA			NA	NA	NA	NA	consistent
395	50	13S03828	RNA	D3	Serotype determined	( + )	3	3			NG	NG	NG	NG	consistent	28
396	50	13S03828	RNA	D4	Serotype determined	( + )	ND	NA			NA	NA	NA	NA	consistent
397	50	13S03828	serum	D1	Serotype determined	( + )	ND	NA			NA	NA	NA	NA	inconsistent
398	50	13S03828	serum	D2	Serotype determined	( + )	ND	NA			NA	NA	NA	NA	inconsistent
399	50	13S03828	serum	D3	Serotype determined	( + )	3	NA			D3	NG		NG	inconsistent	415
400	50	13S03828	serum	D4	Serotype determined	( + )	ND	NA			NA	NA	NA	NA	inconsistent
401	51	13S03832	RNA	D1	Serotype determined	( + )	ND	NA			NA	NA	NA	NA	consistent
402	51	13S03832	RNA	D2	Serotype determined	( + )	ND	NA			NA	NA	NA	NA	consistent
403	51	13S03832	RNA	D3	Serotype determined	( + )	3	NA			NG	NG	NG	NG	consistent	25
404	51	13S03832	RNA	D4	Serotype determined	( + )	ND	NA			NA	NA	NA	NA	consistent
405	51	13S03832	serum	D1	Serotype determined	( + )	ND	NA			NA	NA	NA	NA	consistent
406	51	13S03832	serum	D2	Serotype determined	( + )	ND	NA			NA	NA	NA	NA	consistent
407	51	13S03832	serum	D3	Serotype determined	( + )	3	NA			D3	D3		Den3:10436:A:G	consistent	354
408	51	13S03832	serum	D4	Serotype determined	( + )	ND	NA			NA	NA	NA	NA	consistent
409	52	13S03836	RNA	D1	Not detected	( + )	ND	NA			NA	NA	NA	NA	consistent
410	52	13S03836	RNA	D2	Not detected	( + )	ND	NA			NA	NA	NA	NA	consistent
411	52	13S03836	RNA	D3	Not detected	( + )	3	NA			NG	NG	NG	NG	consistent	29
412	52	13S03836	RNA	D4	Not detected	( + )	ND	NA			NA	NA	NA	NA	consistent
413	52	13S03836	serum	D1	Not detected	( + )	ND	NA			NA	NA	NA	NA	inconsistent
414	52	13S03836	serum	D2	Not detected	( + )	ND	NA			NA	NA	NA	NA	inconsistent
415	52	13S03836	serum	D3	Not detected	( + )	3	NA			NG	D3	NG	Den3:10436:A:G	inconsistent	48
416	52	13S03836	serum	D4	Not detected	( + )	ND	NA			NA	NA	NA	NA	inconsistent
417	53	13S03837	RNA	D1	Serotype determined	( - )	ND	NA			NA	NA	NA	NA	consistent
418	53	13S03837	RNA	D2	Serotype determined	( - )	ND	NA			NA	NA	NA	NA	consistent
419	53	13S03837	RNA	D3	Serotype determined	( - )	3	NA			NG	NG	NG	NG	consistent	17
420	53	13S03837	RNA	D4	Serotype determined	( - )	ND	NA			NA	NA	NA	NA	consistent
421	53	13S03837	serum	D1	Serotype determined	( - )	ND	NA			NA	NA	NA	NA	inconsistent
422	53	13S03837	serum	D2	Serotype determined	( - )	ND	NA			NA	NA	NA	NA	inconsistent
423	53	13S03837	serum	D3	Serotype determined	( - )	3	NA			D3	NG		NG	inconsistent	347
424	53	13S03837	serum	D4	Serotype determined	( - )	ND	NA			NA	NA	NA	NA	inconsistent
425	54	13S03838	RNA	D1	Not detected	( + )	ND	NA			NA	NA	NA	NA	consistent
426	54	13S03838	RNA	D2	Not detected	( + )	ND	NA			NA	NA	NA	NA	consistent
427	54	13S03838	RNA	D3	Not detected	( + )	3	NA			NG	NG	NG	NG	consistent	40
428	54	13S03838	RNA	D4	Not detected	( + )	ND	NA			NA	NA	NA	NA	consistent
429	54	13S03838	serum	D1	Not detected	( + )	ND	NA			NA	NA	NA	NA	consistent
430	54	13S03838	serum	D2	Not detected	( + )	ND	NA			NA	NA	NA	NA	consistent
431	54	13S03838	serum	D3	Not detected	( + )	3	NA			NG	NG	NG	NG	consistent	6
432	54	13S03838	serum	D4	Not detected	( + )	ND	NA			NA	NA	NA	NA	consistent
433	55	13S03839	RNA	D1	Not detected	( + )	ND	NA			NA	NA	NA	NA	consistent
434	55	13S03839	RNA	D2	Not detected	( + )	ND	NA			NA	NA	NA	NA	consistent
435	55	13S03839	RNA	D3	Not detected	( + )	3	NA			NG	NG	NG	NG	consistent	16
436	55	13S03839	RNA	D4	Not detected	( + )	ND	NA			NA	NA	NA	NA	consistent
437	55	13S03839	serum	D1	Not detected	( + )	ND	NA			NA	NA	NA	NA	consistent
438	55	13S03839	serum	D2	Not detected	( + )	ND	NA			NA	NA	NA	NA	consistent
439	55	13S03839	serum	D3	Not detected	( + )	3	NA			NG	NG	NG	NG	consistent	2
440	55	13S03839	serum	D4	Not detected	( + )	ND	NA			NA	NA	NA	NA	consistent
441	56	13S03841	RNA	D1	Serotype determined	( + )	ND	NA			NA	NA	NA	NA	inconsistent
442	56	13S03841	RNA	D2	Serotype determined	( + )	ND	NA			NA	NA	NA	NA	inconsistent
443	56	13S03841	RNA	D3	Serotype determined	( + )	3	3			D3	NG		NG	inconsistent	1562
444	56	13S03841	RNA	D4	Serotype determined	( + )	ND	NA			NA	NA	NA	NA	inconsistent
445	56	13S03841	serum	D1	Serotype determined	( + )	ND	NA			NA	NA	NA	NA	consistent
446	56	13S03841	serum	D2	Serotype determined	( + )	ND	NA			NA	NA	NA	NA	consistent
447	56	13S03841	serum	D3	Serotype determined	( + )	3	NA			NG	NG	NG	NG	consistent	254
448	56	13S03841	serum	D4	Serotype determined	( + )	ND	NA			NA	NA	NA	NA	consistent
449	57	13S03843	RNA	D1	Serotype determined	( + )	ND	NA			NA	NA	NA	NA	consistent
450	57	13S03843	RNA	D2	Serotype determined	( + )	ND	NA			NA	NA	NA	NA	consistent
451	57	13S03843	RNA	D3	Serotype determined	( + )	3	3			D3	D3	Den3:10436:A:G	Den3:10436:A:G	consistent	36
452	57	13S03843	RNA	D4	Serotype determined	( + )	ND	NA			NA	NA	NA	NA	consistent
453	57	13S03843	serum	D1	Serotype determined	( + )	ND	NA			NA	NA	NA	NA	consistent
454	57	13S03843	serum	D2	Serotype determined	( + )	ND	NA			NA	NA	NA	NA	consistent
455	57	13S03843	serum	D3	Serotype determined	( + )	3	NA			NG	NG	NG	NG	consistent	1
456	57	13S03843	serum	D4	Serotype determined	( + )	ND	NA			NA	NA	NA	NA	consistent
457	58	13S03855	RNA	D1	Serotype determined	( + )	ND	NA			NA	NA	NA	NA	consistent
458	58	13S03855	RNA	D2	Serotype determined	( + )	ND	NA			NA	NA	NA	NA	consistent
459	58	13S03855	RNA	D3	Serotype determined	( + )	3	3			D3	D3	Den3:10436:A:G	Den3:10436:A:G	consistent	38
460	58	13S03855	RNA	D4	Serotype determined	( + )	ND	NA			NA	NA	NA	NA	consistent
461	58	13S03855	serum	D1	Serotype determined	( + )	ND	NA			NA	NA	NA	NA	consistent
462	58	13S03855	serum	D2	Serotype determined	( + )	ND	NA			NA	NA	NA	NA	consistent
463	58	13S03855	serum	D3	Serotype determined	( + )	3	NA			NG	NG	NG	NG	consistent	5
464	58	13S03855	serum	D4	Serotype determined	( + )	ND	NA			NA	NA	NA	NA	consistent
465	59	13S03858	RNA	D1	Not detected	( + )	ND	NA			NA	NA	NA	NA	consistent
466	59	13S03858	RNA	D2	Not detected	( + )	ND	NA			NA	NA	NA	NA	consistent
467	59	13S03858	RNA	D3	Not detected	( + )	3	NA			NG	NG	NG	NG	consistent	995
468	59	13S03858	RNA	D4	Not detected	( + )	ND	NA			NA	NA	NA	NA	consistent
469	59	13S03858	serum	D1	Not detected	( + )	ND	NA			NA	NA	NA	NA	consistent
470	59	13S03858	serum	D2	Not detected	( + )	ND	NA			NA	NA	NA	NA	consistent
471	59	13S03858	serum	D3	Not detected	( + )	3	NA			NG	NG	NG	NG	consistent	218
472	59	13S03858	serum	D4	Not detected	( + )	ND	NA			NA	NA	NA	NA	consistent
473	60	13S03865	RNA	D1	Serotype determined	( + )	ND	NA			NA	NA	NA	NA	inconsistent
474	60	13S03865	RNA	D2	Serotype determined	( + )	ND	NA			NA	NA	NA	NA	inconsistent
475	60	13S03865	RNA	D3	Serotype determined	( + )	3	NA			D3	NG		NG	inconsistent	50
476	60	13S03865	RNA	D4	Serotype determined	( + )	ND	NA			NA	NA	NA	NA	inconsistent
477	60	13S03865	serum	D1	Serotype determined	( + )	ND	NA			NA	NA	NA	NA	consistent
478	60	13S03865	serum	D2	Serotype determined	( + )	ND	NA			NA	NA	NA	NA	consistent
479	60	13S03865	serum	D3	Serotype determined	( + )	3	NA			D3	D3			consistent	429
480	60	13S03865	serum	D4	Serotype determined	( + )	ND	NA			NA	NA	NA	NA	consistent
481	61	13S03866	RNA	D1	Serotype determined	( + )	ND	NA			NA	NA	NA	NA	consistent
482	61	13S03866	RNA	D2	Serotype determined	( + )	ND	NA			NA	NA	NA	NA	consistent
483	61	13S03866	RNA	D3	Serotype determined	( + )	3	3			D3	D3	Den3:10436:A:G	Den3:10403:G:C;Den3:10436:A:G	consistent	34
484	61	13S03866	RNA	D4	Serotype determined	( + )	ND	NA			NA	NA	NA	NA	consistent
485	61	13S03866	serum	D1	Serotype determined	( + )	ND	NA			NA	NA	NA	NA
486	61	13S03866	serum	D2	Serotype determined	( + )	ND	NA			NA	NA	NA	NA
487	61	13S03866	serum	D3	Serotype determined	( + )	3	NA			NA	NA	NA	NA
488	61	13S03866	serum	D4	Serotype determined	( + )	ND	NA			NA	NA	NA	NA
489	62	13S03871	RNA	D1	Not detected	( + )	ND	NA			NA	NA	NA	NA	consistent
490	62	13S03871	RNA	D2	Not detected	( + )	ND	NA			NA	NA	NA	NA	consistent
491	62	13S03871	RNA	D3	Not detected	( + )	3	NA			NG	NG	NG	NG	consistent	541
492	62	13S03871	RNA	D4	Not detected	( + )	ND	NA			NA	NA	NA	NA	consistent
493	62	13S03871	serum	D1	Not detected	( + )	ND	NA			NA	NA	NA	NA
494	62	13S03871	serum	D2	Not detected	( + )	ND	NA			NA	NA	NA	NA
495	62	13S03871	serum	D3	Not detected	( + )	3	NA			NA	NA	NA	NA
496	62	13S03871	serum	D4	Not detected	( + )	ND	NA			NA	NA	NA	NA
497	63	13S03872	RNA	D1	Serotype determined	( + )	ND	NA			NA	NA	NA	NA	consistent
498	63	13S03872	RNA	D2	Serotype determined	( + )	ND	NA			NA	NA	NA	NA	consistent
499	63	13S03872	RNA	D3	Serotype determined	( + )	3	NA			D3	D3		Den3:10436:A:G	consistent	19
500	63	13S03872	RNA	D4	Serotype determined	( + )	ND	NA			NA	NA	NA	NA	consistent
501	63	13S03872	serum	D1	Serotype determined	( + )	ND	NA			NA	NA	NA	NA
502	63	13S03872	serum	D2	Serotype determined	( + )	ND	NA			NA	NA	NA	NA
503	63	13S03872	serum	D3	Serotype determined	( + )	3	NA			NA	NA	NA	NA
504	63	13S03872	serum	D4	Serotype determined	( + )	ND	NA			NA	NA	NA	NA
505	64	13S03748	RNA	D1	Serotype determined	( + )	ND	NA			NA	NA	NA	NA	consistent
506	64	13S03748	RNA	D2	Serotype determined	( + )	ND	NA			NA	NA	NA	NA	consistent
507	64	13S03748	RNA	D3	Serotype determined	( + )	ND	NA			NA	NA	NA	NA	consistent
508	64	13S03748	RNA	D4	Serotype determined	( + )	4	4			D4	D4	Den4:10388:G:T	Den4:10388:G:T	consistent	292
509	64	13S03748	serum	D1	Serotype determined	( + )	ND	NA			NG	NA	NG	NA	consistent	0
510	64	13S03748	serum	D2	Serotype determined	( + )	ND	NA			NG	NA	NG	NA	consistent	0
511	64	13S03748	serum	D3	Serotype determined	( + )	ND	NA			NG	NA	NG	NA	consistent	14
512	64	13S03748	serum	D4	Serotype determined	( + )	4	NA			D4	D4			consistent	140
513	65	13S03749	RNA	D1	Serotype determined	( + )	ND	NA			NA	NA	NA	NA	consistent
514	65	13S03749	RNA	D2	Serotype determined	( + )	ND	NA			NA	NA	NA	NA	consistent
515	65	13S03749	RNA	D3	Serotype determined	( + )	ND	NA			NA	NA	NA	NA	consistent
516	65	13S03749	RNA	D4	Serotype determined	( + )	4	NA			D4	D4			consistent	303
517	65	13S03749	serum	D1	Serotype determined	( + )	ND	NA			NA	NA	NA	NA	consistent
518	65	13S03749	serum	D2	Serotype determined	( + )	ND	NA			NA	NA	NA	NA	consistent
519	65	13S03749	serum	D3	Serotype determined	( + )	ND	NA			NA	NA	NA	NA	consistent
520	65	13S03749	serum	D4	Serotype determined	( + )	4	NA			D4	D4			consistent	584
521	66	13S03754	RNA	D1	Serotype determined	( - )	ND	NA			NA	NA	NA	NA	consistent
522	66	13S03754	RNA	D2	Serotype determined	( - )	ND	NA			NA	NA	NA	NA	consistent
523	66	13S03754	RNA	D3	Serotype determined	( - )	ND	NA			NA	NA	NA	NA	consistent
524	66	13S03754	RNA	D4	Serotype determined	( - )	4	NA			D4	D4	Den4:10388:G:T	Den4:10388:G:T	consistent	350
525	66	13S03754	serum	D1	Serotype determined	( - )	ND	NA			NA	NA	NA	NA	consistent
526	66	13S03754	serum	D2	Serotype determined	( - )	ND	NA			NA	NA	NA	NA	consistent
527	66	13S03754	serum	D3	Serotype determined	( - )	ND	NA			NA	NA	NA	NA	consistent
528	66	13S03754	serum	D4	Serotype determined	( - )	4	NA			D4	D4			consistent	1327
529	67	13S03756	RNA	D1	Serotype determined	( - )	ND	NA			NA	NA	NA	NA	consistent
530	67	13S03756	RNA	D2	Serotype determined	( - )	ND	NA			NA	NA	NA	NA	consistent
531	67	13S03756	RNA	D3	Serotype determined	( - )	ND	NA			NA	NA	NA	NA	consistent
532	67	13S03756	RNA	D4	Serotype determined	( - )	4	4			D4	D4	Den4:10388:G:T	Den4:10388:G:T	consistent	22
533	67	13S03756	serum	D1	Serotype determined	( - )	ND	NA			NA	NA	NA	NA	consistent
534	67	13S03756	serum	D2	Serotype determined	( - )	ND	NA			NA	NA	NA	NA	consistent
535	67	13S03756	serum	D3	Serotype determined	( - )	ND	NA			NA	NA	NA	NA	consistent
536	67	13S03756	serum	D4	Serotype determined	( - )	4	NA			D4	D4			consistent	49
537	68	13S03766	RNA	D1	Serotype determined	( + )	ND	NA			NA	NA	NA	NA	consistent
538	68	13S03766	RNA	D2	Serotype determined	( + )	ND	NA			NA	NA	NA	NA	consistent
539	68	13S03766	RNA	D3	Serotype determined	( + )	ND	NA			NA	NA	NA	NA	consistent
540	68	13S03766	RNA	D4	Serotype determined	( + )	4	NA			D4	D4			consistent	100
541	68	13S03766	serum	D1	Serotype determined	( + )	ND	NA			NA	NA	NA	NA	consistent
542	68	13S03766	serum	D2	Serotype determined	( + )	ND	NA			NA	NA	NA	NA	consistent
543	68	13S03766	serum	D3	Serotype determined	( + )	ND	NA			NA	NA	NA	NA	consistent
544	68	13S03766	serum	D4	Serotype determined	( + )	4	NA			D4	D4		Den4:10388:G:T	consistent	724
545	69	13S03777	RNA	D1	Multiple serotype candidates	( + )	ND	NA			D1	NA	Den1:10527:C:T;Den1:10581:C:G	NA	inconsistent	101
546	69	13S03777	RNA	D2	Multiple serotype candidates	( + )	ND	NA			NG	NA	NG	NA	inconsistent	0
547	69	13S03777	RNA	D3	Multiple serotype candidates	( + )	ND	NA			D3	NA	Den3:10436:A:G	NA	inconsistent	163
548	69	13S03777	RNA	D4	Multiple serotype candidates	( + )	4	4			D4	D4			inconsistent	68
549	69	13S03777	serum	D1	Multiple serotype candidates	( + )	ND	NA			NG	NA	NG	NA	consistent	0
550	69	13S03777	serum	D2	Multiple serotype candidates	( + )	ND	NA			NG	NA	NG	NA	consistent	0
551	69	13S03777	serum	D3	Multiple serotype candidates	( + )	ND	NA			NG	NA	NG	NA	consistent	7
552	69	13S03777	serum	D4	Multiple serotype candidates	( + )	4	NA			D4	D4			consistent	462
553	70	13S03781	RNA	D1	Multiple serotype candidates	( - )	ND	NA			D1	NA	Den1:10553:G:A;Den1:10579:C:T	NA	inconsistent	70
554	70	13S03781	RNA	D2	Multiple serotype candidates	( - )	ND	NA			NG	NA	NG	NA	inconsistent	1
555	70	13S03781	RNA	D3	Multiple serotype candidates	( - )	ND	NA			D3	NA	Den3:10436:A:G	NA	inconsistent	124
556	70	13S03781	RNA	D4	Multiple serotype candidates	( - )	4	4			D4	D4			inconsistent	49
557	70	13S03781	serum	D1	Multiple serotype candidates	( - )	ND	NA			NA	NA	NA	NA	consistent
558	70	13S03781	serum	D2	Multiple serotype candidates	( - )	ND	NA			NA	NA	NA	NA	consistent
559	70	13S03781	serum	D3	Multiple serotype candidates	( - )	ND	NA			NA	NA	NA	NA	consistent
560	70	13S03781	serum	D4	Multiple serotype candidates	( - )	4	NA			D4	D4	Den4:10388:G:T		consistent	776
561	71	13S03795	RNA	D1	Multiple serotype candidates	( + )	ND	NA			D1	NA	Den1:10553:G:A	NA	inconsistent	80
562	71	13S03795	RNA	D2	Multiple serotype candidates	( + )	ND	NA			NG	NA	NG	NA	inconsistent	1
563	71	13S03795	RNA	D3	Multiple serotype candidates	( + )	ND	NA			D3	NA		NA	inconsistent	140
564	71	13S03795	RNA	D4	Multiple serotype candidates	( + )	4	4			D4	D4			inconsistent	41
565	71	13S03795	serum	D1	Multiple serotype candidates	( + )	ND	NA			NG	NA	NG	NA	consistent	0
566	71	13S03795	serum	D2	Multiple serotype candidates	( + )	ND	NA			NG	NA	NG	NA	consistent	5
567	71	13S03795	serum	D3	Multiple serotype candidates	( + )	ND	NA			NG	NA	NG	NA	consistent	326
568	71	13S03795	serum	D4	Multiple serotype candidates	( + )	4	NA			D4	D4		Den4:10388:G:T	consistent	204
569	72	13S03820	RNA	D1	Serotype determined	( + )	ND	NA			NA	NA	NA	NA	consistent
570	72	13S03820	RNA	D2	Serotype determined	( + )	ND	NA			NA	NA	NA	NA	consistent
571	72	13S03820	RNA	D3	Serotype determined	( + )	ND	NA			NA	NA	NA	NA	consistent
572	72	13S03820	RNA	D4	Serotype determined	( + )	4	NA			D4	D4		Den4:10388:G:T	consistent	97
573	72	13S03820	serum	D1	Serotype determined	( + )	ND	NA			NA	NA	NA	NA
574	72	13S03820	serum	D2	Serotype determined	( + )	ND	NA			NA	NA	NA	NA
575	72	13S03820	serum	D3	Serotype determined	( + )	ND	NA			NA	NA	NA	NA
576	72	13S03820	serum	D4	Serotype determined	( + )	4	NA			NA	NA	NA	NA
577	73	13S03825	RNA	D1	Serotype determined	( - )	ND	NA			NA	NA	NA	NA	consistent
578	73	13S03825	RNA	D2	Serotype determined	( - )	ND	NA			NA	NA	NA	NA	consistent
579	73	13S03825	RNA	D3	Serotype determined	( - )	ND	NA			NA	NA	NA	NA	consistent
580	73	13S03825	RNA	D4	Serotype determined	( - )	4	4			D4	D4		Den4:10405:C:T	consistent	57
581	73	13S03825	serum	D1	Serotype determined	( - )	ND	NA			NA	NA	NA	NA	consistent
582	73	13S03825	serum	D2	Serotype determined	( - )	ND	NA			NA	NA	NA	NA	consistent
583	73	13S03825	serum	D3	Serotype determined	( - )	ND	NA			NA	NA	NA	NA	consistent
584	73	13S03825	serum	D4	Serotype determined	( - )	4	NA			D4	D4	Den4:10388:G:T	Den4:10388:G:T	consistent	310
585	74	13S03833	RNA	D1	Serotype determined	( + )	ND	NA			NA	NA	NA	NA	consistent
586	74	13S03833	RNA	D2	Serotype determined	( + )	ND	NA			NA	NA	NA	NA	consistent
587	74	13S03833	RNA	D3	Serotype determined	( + )	ND	NA			NA	NA	NA	NA	consistent
588	74	13S03833	RNA	D4	Serotype determined	( + )	4	NA			D4	D4		Den4:10388:G:T	consistent	107
589	74	13S03833	serum	D1	Serotype determined	( + )	ND	NA			NA	NA	NA	NA
590	74	13S03833	serum	D2	Serotype determined	( + )	ND	NA			NA	NA	NA	NA
591	74	13S03833	serum	D3	Serotype determined	( + )	ND	NA			NA	NA	NA	NA
592	74	13S03833	serum	D4	Serotype determined	( + )	4	NA			NA	NA	NA	NA
593	75	13S03845	RNA	D1	Serotype determined	( - )	ND	NA			NA	NA	NA	NA	inconsistent
594	75	13S03845	RNA	D2	Serotype determined	( - )	ND	NA			NA	NA	NA	NA	inconsistent
595	75	13S03845	RNA	D3	Serotype determined	( - )	ND	NA			NA	NA	NA	NA	inconsistent
596	75	13S03845	RNA	D4	Serotype determined	( - )	4	4			NG	D4	NG		inconsistent	1
597	75	13S03845	serum	D1	Serotype determined	( - )	ND	NA			NG	NA	NG	NA	consistent	0
598	75	13S03845	serum	D2	Serotype determined	( - )	ND	NA			NG	NA	NG	NA	consistent	0
599	75	13S03845	serum	D3	Serotype determined	( - )	ND	NA			NG	NA	NG	NA	consistent	2
600	75	13S03845	serum	D4	Serotype determined	( - )	4	NA			D4	D4		Den4:10388:G:T	consistent	582
601	76	13S03846	RNA	D1	Serotype determined	( - )	ND	NA			NA	NA	NA	NA	consistent
602	76	13S03846	RNA	D2	Serotype determined	( - )	ND	NA			NA	NA	NA	NA	consistent
603	76	13S03846	RNA	D3	Serotype determined	( - )	ND	NA			NA	NA	NA	NA	consistent
604	76	13S03846	RNA	D4	Serotype determined	( - )	4	NA			D4	D4		Den4:10388:G:T	consistent	69
605	76	13S03846	serum	D1	Serotype determined	( - )	ND	NA			NA	NA	NA	NA
606	76	13S03846	serum	D2	Serotype determined	( - )	ND	NA			NA	NA	NA	NA
607	76	13S03846	serum	D3	Serotype determined	( - )	ND	NA			NA	NA	NA	NA
608	76	13S03846	serum	D4	Serotype determined	( - )	4	NA			NA	NA	NA	NA
609	77	13S03854	RNA	D1	Serotype determined	( - )	ND	NA			NA	NA	NA	NA	consistent
610	77	13S03854	RNA	D2	Serotype determined	( - )	ND	NA			NA	NA	NA	NA	consistent
611	77	13S03854	RNA	D3	Serotype determined	( - )	ND	NA			NA	NA	NA	NA	consistent
612	77	13S03854	RNA	D4	Serotype determined	( - )	4	NA			D4	D4		Den4:10388:G:T	consistent	33
613	77	13S03854	serum	D1	Serotype determined	( - )	ND	NA			NA	NA	NA	NA
614	77	13S03854	serum	D2	Serotype determined	( - )	ND	NA			NA	NA	NA	NA
615	77	13S03854	serum	D3	Serotype determined	( - )	ND	NA			NA	NA	NA	NA
616	77	13S03854	serum	D4	Serotype determined	( - )	4	NA			NA	NA	NA	NA
617	78	13S03859	RNA	D1	Serotype determined	( - )	ND	NA			NA	NA	NA	NA	consistent
618	78	13S03859	RNA	D2	Serotype determined	( - )	ND	NA			NA	NA	NA	NA	consistent
619	78	13S03859	RNA	D3	Serotype determined	( - )	ND	NA			NA	NA	NA	NA	consistent
620	78	13S03859	RNA	D4	Serotype determined	( - )	4	NA			D4	D4		Den4:10388:G:T	consistent	61
621	78	13S03859	serum	D1	Serotype determined	( - )	ND	NA			NA	NA	NA	NA	consistent
622	78	13S03859	serum	D2	Serotype determined	( - )	ND	NA			NA	NA	NA	NA	consistent
623	78	13S03859	serum	D3	Serotype determined	( - )	ND	NA			NA	NA	NA	NA	consistent
624	78	13S03859	serum	D4	Serotype determined	( - )	4	NA			D4	D4		Den4:10405:C:T	consistent	492
625	79	13S03868	RNA	D1	Serotype determined	( + )	ND	NA			NA	NA	NA	NA	consistent
626	79	13S03868	RNA	D2	Serotype determined	( + )	ND	NA			NA	NA	NA	NA	consistent
627	79	13S03868	RNA	D3	Serotype determined	( + )	ND	NA			NA	NA	NA	NA	consistent
628	79	13S03868	RNA	D4	Serotype determined	( + )	4	NA			D4	D4		Den4:10388:G:T	consistent	28
629	79	13S03868	serum	D1	Serotype determined	( + )	ND	NA			NA	NA	NA	NA
630	79	13S03868	serum	D2	Serotype determined	( + )	ND	NA			NA	NA	NA	NA
631	79	13S03868	serum	D3	Serotype determined	( + )	ND	NA			NA	NA	NA	NA
632	79	13S03868	serum	D4	Serotype determined	( + )	4	NA			NA	NA	NA	NA
633	80	13S03874	RNA	D1	Serotype determined	( + )	ND	NA			NA	NA	NA	NA	consistent
634	80	13S03874	RNA	D2	Serotype determined	( + )	ND	NA			NA	NA	NA	NA	consistent
635	80	13S03874	RNA	D3	Serotype determined	( + )	ND	NA			NA	NA	NA	NA	consistent
636	80	13S03874	RNA	D4	Serotype determined	( + )	4	NA			D4	D4			consistent	39
637	80	13S03874	serum	D1	Serotype determined	( + )	ND	NA			NA	NA	NA	NA
638	80	13S03874	serum	D2	Serotype determined	( + )	ND	NA			NA	NA	NA	NA
639	80	13S03874	serum	D3	Serotype determined	( + )	ND	NA			NA	NA	NA	NA
640	80	13S03874	serum	D4	Serotype determined	( + )	4	NA			NA	NA	NA	NA
