# Supplementary material for: Serotyping dengue virus with isothermal amplification and a portable sequencer
Source: Springer Nature journal article supplement (doi:10.1038/s41598-017-03734-5), 2017-06-08
Supplement: MOESM3 [file 41598_2017_3734_MOESM3_ESM.xls]

## Sheet: Vietnam
No.	sample no	sample code	sample type	Examined serotype	Pie chart category	NS1	RT-PCR (NA: not analyzed, ND: not detected)	Sanger (NA: not analyzed)	LAMP (NA: not analyzed, ND: not detected)	LAMP products (ng/ul)	Nanopore	Illumina	Nanopore SNP call	Illumina SNP call	Number of assigned reads	Number of mapped reads	Number of reads mapped to the corresponding serotype	Number of total match base	Number of total mismatch base	Number of total insertion base	Number of total deletion base	Number of total insertion position	Number of total deletion position	Accuracy
1	1	13S03732	RNA	D1	Serotype determined	( - )	1	1	1	167	D1	D1		Den1:10581:C:G	705	676	675	66391	6735	1760	5255	1071	2538	0.828427
2	1	13S03732	RNA	D2	Serotype determined	( - )	ND	NA	ND	ND	NA	NA	NA	NA
3	1	13S03732	RNA	D3	Serotype determined	( - )	ND	NA	ND	ND	NA	NA	NA	NA
4	1	13S03732	RNA	D4	Serotype determined	( - )	ND	NA	ND	ND	NA	NA	NA	NA
5	1	13S03732	serum	D1	Serotype determined	( - )	1	NA	ND	ND	NA	NG	NA	NG
6	1	13S03732	serum	D2	Serotype determined	( - )	ND	NA	ND	ND	NA	NA	NA	NA
7	1	13S03732	serum	D3	Serotype determined	( - )	ND	NA	ND	ND	NA	NA	NA	NA
8	1	13S03732	serum	D4	Serotype determined	( - )	ND	NA	ND	ND	NA	NA	NA	NA
9	2	13S03733	RNA	D1	Multiple serotype candidates	( + )	1	1	1	NA	D1	NG		NG	404	103	103	6100	693	1688	123	263	78	0.708973
10	2	13S03733	RNA	D2	Multiple serotype candidates	( + )	ND	NA	ND	ND	NA	NA	NA	NA
11	2	13S03733	RNA	D3	Multiple serotype candidates	( + )	ND	NA	ND	ND	NA	NA	NA	NA
12	2	13S03733	RNA	D4	Multiple serotype candidates	( + )	ND	NA	ND	ND	NA	NA	NA	NA
13	2	13S03733	serum	D1	Multiple serotype candidates	( + )	1	NA	1	167	D1	NG		NG	317	186	181	7936	418	308	532	111	218	0.863172
14	2	13S03733	serum	D2	Multiple serotype candidates	( + )	ND	NA	2	NA	NG	NA	NG	NA	125	14	8	377	34	24	51	12	9	0.77572
15	2	13S03733	serum	D3	Multiple serotype candidates	( + )	ND	NA	3	NA	D3	NA		NA	218	59	54	2161	110	28	357	27	62	0.81363
16	2	13S03733	serum	D4	Multiple serotype candidates	( + )	ND	NA	4	NA	NG	NA	NG	NA	14	7	7	743	124	43	61	16	32	0.765191
17	3	13S03737	RNA	D1	Multiple serotype candidates	( + )	1	1	1	NA	D1	NG		NG	59	38	38	2727	431	428	282	110	63	0.705016
18	3	13S03737	RNA	D2	Multiple serotype candidates	( + )	ND	NA	2	NA	NG	NA	NG	NA	0	0	0	0	0	0	0	0	0
19	3	13S03737	RNA	D3	Multiple serotype candidates	( + )	ND	NA	3	NA	D3	NA		NA	136	26	25	1116	65	12	296	9	52	0.749496
20	3	13S03737	RNA	D4	Multiple serotype candidates	( + )	ND	NA	4	NA	D4	NA		NA	103	98	98	11510	2040	487	736	261	413	0.779124
21	3	13S03737	serum	D1	Multiple serotype candidates	( + )	1	NA	1	NA	D1	D1			714	567	565	48904	8422	1589	5178	894	2403	0.763016
22	3	13S03737	serum	D2	Multiple serotype candidates	( + )	ND	NA	2	NA	NG	NA	NG	NA	1	1	0	0	0	0	0	0	0
23	3	13S03737	serum	D3	Multiple serotype candidates	( + )	ND	NA	3	NA	NG	NA	NG	NA	25	8	8	292	9	0	40	0	12	0.856305
24	3	13S03737	serum	D4	Multiple serotype candidates	( + )	ND	NA	4	NA	D4	NA		NA	297	281	281	33852	6189	1797	1978	983	1126	0.772594
25	4	13S03738	RNA	D1	Serotype determined	( + )	1	1	1	NA	D1	NG		NG	178	74	74	4621	654	515	362	121	105	0.751138
26	4	13S03738	RNA	D2	Serotype determined	( + )	ND	NA	ND	ND	NA	NA	NA	NA
27	4	13S03738	RNA	D3	Serotype determined	( + )	ND	NA	ND	ND	NA	NA	NA	NA
28	4	13S03738	RNA	D4	Serotype determined	( + )	ND	NA	ND	ND	NA	NA	NA	NA
29	4	13S03738	serum	D1	Serotype determined	( + )	1	NA	ND	ND	NA	NA	NA	NA
30	4	13S03738	serum	D2	Serotype determined	( + )	ND	NA	ND	ND	NA	NA	NA	NA
31	4	13S03738	serum	D3	Serotype determined	( + )	ND	NA	ND	ND	NA	NA	NA	NA
32	4	13S03738	serum	D4	Serotype determined	( + )	ND	NA	ND	ND	NA	NA	NA	NA
33	5	13S03740	RNA	D1	Serotype determined	( + )	1	1	1	NA	D1	D1		Den1:10581:C:G	489	449	443	37832	4006	957	4135	593	1636	0.806137
34	5	13S03740	RNA	D2	Serotype determined	( + )	ND	NA	ND	ND	NA	NA	NA	NA
35	5	13S03740	RNA	D3	Serotype determined	( + )	ND	NA	ND	ND	NA	NA	NA	NA
36	5	13S03740	RNA	D4	Serotype determined	( + )	ND	NA	ND	ND	NA	NA	NA	NA
37	5	13S03740	serum	D1	Serotype determined	( + )	1	NA	1	47	D1	NG		NG	321	60	57	2287	159	196	74	40	30	0.842047
38	5	13S03740	serum	D2	Serotype determined	( + )	ND	NA	ND	ND	NA	NA	NA	NA
39	5	13S03740	serum	D3	Serotype determined	( + )	ND	NA	ND	ND	NA	NA	NA	NA
40	5	13S03740	serum	D4	Serotype determined	( + )	ND	NA	ND	ND	NA	NA	NA	NA
41	6	13S03799	RNA	D1	Serotype determined	( + )	1	1	1	NA	D1	NG	Den1:10527:C:T	NG	64	39	39	3340	365	138	231	65	126	0.819833
42	6	13S03799	RNA	D2	Serotype determined	( + )	ND	NA	ND	ND	NA	NA	NA	NA
43	6	13S03799	RNA	D3	Serotype determined	( + )	ND	NA	ND	ND	NA	NA	NA	NA
44	6	13S03799	RNA	D4	Serotype determined	( + )	ND	NA	ND	ND	NA	NA	NA	NA
45	6	13S03799	serum	D1	Serotype determined	( + )	1	NA	1	NA	D1	D1		Den1:10581:C:G	383	12	11	572	64	9	181	5	21	0.692494
46	6	13S03799	serum	D2	Serotype determined	( + )	ND	NA	ND	ND	NA	NA	NA	NA
47	6	13S03799	serum	D3	Serotype determined	( + )	ND	NA	ND	ND	NA	NA	NA	NA
48	6	13S03799	serum	D4	Serotype determined	( + )	ND	NA	ND	ND	NA	NA	NA	NA
49	7	13S03800	RNA	D1	Serotype determined	( + )	1	1	1	NA	NG	NG	NG	NG	18	9	9	622	50	9	73	7	28	0.824934
50	7	13S03800	RNA	D2	Serotype determined	( + )	ND	NA	ND	ND	NA	NA	NA	NA
51	7	13S03800	RNA	D3	Serotype determined	( + )	ND	NA	ND	ND	NA	NA	NA	NA
52	7	13S03800	RNA	D4	Serotype determined	( + )	ND	NA	ND	ND	NA	NA	NA	NA
53	7	13S03800	serum	D1	Serotype determined	( + )	1	NA	1	68	D1	NG		NG	1207	51	49	2809	432	92	691	40	136	0.698062
54	7	13S03800	serum	D2	Serotype determined	( + )	ND	NA	ND	ND	NA	NA	NA	NA
55	7	13S03800	serum	D3	Serotype determined	( + )	ND	NA	ND	ND	NA	NA	NA	NA
56	7	13S03800	serum	D4	Serotype determined	( + )	ND	NA	ND	ND	NA	NA	NA	NA
57	8	13S03801	RNA	D1	Serotype determined	( + )	1	1	1	NA	D1	D1		Den1:10581:C:G	548	520	520	50696	5026	1210	4086	789	2040	0.830837
58	8	13S03801	RNA	D2	Serotype determined	( + )	ND	NA	ND	ND	NA	NA	NA	NA
59	8	13S03801	RNA	D3	Serotype determined	( + )	ND	NA	ND	ND	NA	NA	NA	NA
60	8	13S03801	RNA	D4	Serotype determined	( + )	ND	NA	ND	ND	NA	NA	NA	NA
61	8	13S03801	serum	D1	Serotype determined	( + )	1	NA	1	136	NG	NG	NG	NG	5	0	0	0	0	0	0	0	0
62	8	13S03801	serum	D2	Serotype determined	( + )	ND	NA	ND	ND	NA	NA	NA	NA
63	8	13S03801	serum	D3	Serotype determined	( + )	ND	NA	ND	ND	NA	NA	NA	NA
64	8	13S03801	serum	D4	Serotype determined	( + )	ND	NA	ND	ND	NA	NA	NA	NA
65	9	13S03802	RNA	D1	Serotype determined	( + )	1	1	1	NA	D1	NG		NG	689	438	433	20371	1323	870	1513	273	592	0.846077
66	9	13S03802	RNA	D2	Serotype determined	( + )	ND	NA	ND	ND	NA	NA	NA	NA
67	9	13S03802	RNA	D3	Serotype determined	( + )	ND	NA	ND	ND	NA	NA	NA	NA
68	9	13S03802	RNA	D4	Serotype determined	( + )	ND	NA	ND	ND	NA	NA	NA	NA
69	9	13S03802	serum	D1	Serotype determined	( + )	1	NA	1	NA	D1	NG		NG	131	60	58	2523	206	128	124	35	39	0.84636
70	9	13S03802	serum	D2	Serotype determined	( + )	ND	NA	ND	ND	NA	NA	NA	NA
71	9	13S03802	serum	D3	Serotype determined	( + )	ND	NA	ND	ND	NA	NA	NA	NA
72	9	13S03802	serum	D4	Serotype determined	( + )	ND	NA	ND	ND	NA	NA	NA	NA
73	10	13S03806	RNA	D1	Serotype determined	( + )	1	NA	ND	ND	D1	D1		Den1:10581:C:G	434	411	411	38855	4317	1065	3347	622	1697	0.816556
74	10	13S03806	RNA	D2	Serotype determined	( + )	ND	NA	ND	ND	NA	NA	NA	NA
75	10	13S03806	RNA	D3	Serotype determined	( + )	ND	NA	ND	ND	NA	NA	NA	NA
76	10	13S03806	RNA	D4	Serotype determined	( + )	ND	NA	ND	ND	NA	NA	NA	NA
77	10	13S03806	serum	D1	Serotype determined	( + )	1	NA	1	78	D1	NG		NG	58	11	10	447	23	6	57	5	14	0.838649
78	10	13S03806	serum	D2	Serotype determined	( + )	ND	NA	ND	ND	NA	NA	NA	NA
79	10	13S03806	serum	D3	Serotype determined	( + )	ND	NA	ND	ND	NA	NA	NA	NA
80	10	13S03806	serum	D4	Serotype determined	( + )	ND	NA	ND	ND	NA	NA	NA	NA
81	11	13S03812	RNA	D1	Serotype determined	( + )	1	NA	1	NA	D1	NG		NG	728	178	178	10040	1167	2093	338	334	154	0.736178
82	11	13S03812	RNA	D2	Serotype determined	( + )	ND	NA	ND	ND	NA	NA	NA	NA
83	11	13S03812	RNA	D3	Serotype determined	( + )	ND	NA	ND	ND	NA	NA	NA	NA
84	11	13S03812	RNA	D4	Serotype determined	( + )	ND	NA	ND	ND	NA	NA	NA	NA
85	11	13S03812	serum	D1	Serotype determined	( + )	1	NA	ND	ND	NA	NA	NA	NA
86	11	13S03812	serum	D2	Serotype determined	( + )	ND	NA	ND	ND	NA	NA	NA	NA
87	11	13S03812	serum	D3	Serotype determined	( + )	ND	NA	ND	ND	NA	NA	NA	NA
88	11	13S03812	serum	D4	Serotype determined	( + )	ND	NA	ND	ND	NA	NA	NA	NA
89	12	13S03814	RNA	D1	Serotype determined	( + )	1	NA	1	NA	D1	NG		NG	136	28	27	1951	206	145	132	44	63	0.801561
90	12	13S03814	RNA	D2	Serotype determined	( + )	ND	NA	ND	ND	NA	NA	NA	NA
91	12	13S03814	RNA	D3	Serotype determined	( + )	ND	NA	ND	ND	NA	NA	NA	NA
92	12	13S03814	RNA	D4	Serotype determined	( + )	ND	NA	ND	ND	NA	NA	NA	NA
93	12	13S03814	serum	D1	Serotype determined	( + )	1	NA	1	31	D1	NG		NG	714	57	56	3143	427	325	323	102	92	0.74514
94	12	13S03814	serum	D2	Serotype determined	( + )	ND	NA	ND	ND	NA	NA	NA	NA
95	12	13S03814	serum	D3	Serotype determined	( + )	ND	NA	ND	ND	NA	NA	NA	NA
96	12	13S03814	serum	D4	Serotype determined	( + )	ND	NA	ND	ND	NA	NA	NA	NA
97	13	13S03834	RNA	D1	Serotype determined	( + )	1	1	1	170	D1	D1	Den1:10527:C:T;Den1:10581:C:G		868	488	483	34480	4024	1509	2653	591	1258	0.808138
98	13	13S03834	RNA	D2	Serotype determined	( + )	ND	NA	ND	ND	NA	NA	NA	NA
99	13	13S03834	RNA	D3	Serotype determined	( + )	ND	NA	ND	ND	NA	NA	NA	NA
100	13	13S03834	RNA	D4	Serotype determined	( + )	ND	NA	ND	ND	NA	NA	NA	NA
101	13	13S03834	serum	D1	Serotype determined	( + )	1	NA	1	135	NG	NG	NG	NG	104	9	9	448	48	91	11	17	6	0.749164
102	13	13S03834	serum	D2	Serotype determined	( + )	ND	NA	ND	ND	NA	NA	NA	NA
103	13	13S03834	serum	D3	Serotype determined	( + )	ND	NA	ND	ND	NA	NA	NA	NA
104	13	13S03834	serum	D4	Serotype determined	( + )	ND	NA	ND	ND	NA	NA	NA	NA
105	14	13S03847	RNA	D1	Serotype determined	( + )	1	NA	1	NA	D1	NG		NG	744	189	184	8667	650	674	571	143	227	0.820583
106	14	13S03847	RNA	D2	Serotype determined	( + )	ND	NA	ND	ND	NA	NA	NA	NA
107	14	13S03847	RNA	D3	Serotype determined	( + )	ND	NA	ND	ND	NA	NA	NA	NA
108	14	13S03847	RNA	D4	Serotype determined	( + )	ND	NA	ND	ND	NA	NA	NA	NA
109	14	13S03847	serum	D1	Serotype determined	( + )	1	NA	ND	ND	NA	NA	NA	NA
110	14	13S03847	serum	D2	Serotype determined	( + )	ND	NA	ND	ND	NA	NA	NA	NA
111	14	13S03847	serum	D3	Serotype determined	( + )	ND	NA	ND	ND	NA	NA	NA	NA
112	14	13S03847	serum	D4	Serotype determined	( + )	ND	NA	ND	ND	NA	NA	NA	NA
113	15	13S03857	RNA	D1	Serotype determined	( - )	1	1	1	167	D1	D1	Den1:10581:C:G	Den1:10581:C:G	417	402	399	40429	4376	1780	2393	967	1323	0.825452
114	15	13S03857	RNA	D2	Serotype determined	( - )	ND	NA	ND	ND	NA	NA	NA	NA
115	15	13S03857	RNA	D3	Serotype determined	( - )	ND	NA	ND	ND	NA	NA	NA	NA
116	15	13S03857	RNA	D4	Serotype determined	( - )	ND	NA	ND	ND	NA	NA	NA	NA
117	15	13S03857	serum	D1	Serotype determined	( - )	1	NA	1	22	D1	NG		NG	1129	223	221	11018	973	1732	959	305	268	0.750443
118	15	13S03857	serum	D2	Serotype determined	( - )	ND	NA	ND	ND	NA	NA	NA	NA
119	15	13S03857	serum	D3	Serotype determined	( - )	ND	NA	ND	ND	NA	NA	NA	NA
120	15	13S03857	serum	D4	Serotype determined	( - )	ND	NA	ND	ND	NA	NA	NA	NA
121	16	13S03879	RNA	D1	Serotype determined	( + )	1	1	1	NA	D1	D1			163	91	89	7084	867	375	630	141	271	0.790978
122	16	13S03879	RNA	D2	Serotype determined	( + )	ND	NA	ND	ND	NA	NA	NA	NA
123	16	13S03879	RNA	D3	Serotype determined	( + )	ND	NA	ND	ND	NA	NA	NA	NA
124	16	13S03879	RNA	D4	Serotype determined	( + )	ND	NA	ND	ND	NA	NA	NA	NA
125	16	13S03879	serum	D1	Serotype determined	( + )	1	NA	1	NA	D1	NG		NG	273	273	111	6350	535	530	1124	130	172	0.743647
126	16	13S03879	serum	D2	Serotype determined	( + )	ND	NA	ND	ND	NA	NA	NA	NA
127	16	13S03879	serum	D3	Serotype determined	( + )	ND	NA	ND	ND	NA	NA	NA	NA
128	16	13S03879	serum	D4	Serotype determined	( + )	ND	NA	ND	ND	NA	NA	NA	NA
129	17	13S03880	RNA	D1	Serotype undetermined	( + )	1	1	1	NA	NG	NG	NG	NG	4	4	4	289	33	7	15	5	9	0.840116
130	17	13S03880	RNA	D2	Serotype undetermined	( + )	ND	NA	2	NA	NG	NA	NG	NA	0	0	0	0	0	0	0	0	0
131	17	13S03880	RNA	D3	Serotype undetermined	( + )	ND	NA	3	NA	D3	NA		NA	62	18	18	761	34	8	182	7	34	0.772589
132	17	13S03880	RNA	D4	Serotype undetermined	( + )	ND	NA	4	NA	D4	NA		NA	40	39	39	4551	780	179	294	101	151	0.784114
133	17	13S03880	serum	D1	Serotype undetermined	( + )	1	NA	1	NA	D1	NG		NG	279	28	25	1641	236	158	59	45	36	0.783668
134	17	13S03880	serum	D2	Serotype undetermined	( + )	ND	NA	2	NA	NG	NA	NG	NA	1	1	0	0	0	0	0	0	0
135	17	13S03880	serum	D3	Serotype undetermined	( + )	ND	NA	3	NA	NG	NA	NG	NA	5	1	1	59	7	10	1	5	1	0.766234
136	17	13S03880	serum	D4	Serotype undetermined	( + )	ND	NA	4	NA	D4	NA		NA	269	243	243	30253	5259	1617	1851	870	988	0.776116
137	18	13S03745	RNA	D1	Serotype undetermined	( + )	ND	NA	ND	ND	NA	NA	NA	NA
138	18	13S03745	RNA	D2	Serotype undetermined	( + )	2	2	2	135	D2	NG		NG	299	40	34	1548	137	228	55	50	29	0.786585
139	18	13S03745	RNA	D3	Serotype undetermined	( + )	ND	NA	ND	ND	NA	NA	NA	NA
140	18	13S03745	RNA	D4	Serotype undetermined	( + )	ND	NA	ND	ND	NA	NA	NA	NA
141	18	13S03745	serum	D1	Serotype undetermined	( + )	ND	NA	ND	ND	NG	NA	NG	NA	0	0	0	0	0	0	0	0	0
142	18	13S03745	serum	D2	Serotype undetermined	( + )	2	NA	2	170	NG	NG	NG	NG	1	1	0	0	0	0	0	0	0
143	18	13S03745	serum	D3	Serotype undetermined	( + )	ND	NA	ND	ND	NG	NA	NG	NA	26	5	5	198	7	0	41	0	10	0.804878
144	18	13S03745	serum	D4	Serotype undetermined	( + )	ND	NA	ND	ND	D4	NA		NA	130	64	64	7348	1392	407	476	216	262	0.763587
145	19	13S03807	RNA	D1	Multiple serotype candidates	( - )	ND	NA	ND	ND	NA	NA	NA	NA
146	19	13S03807	RNA	D2	Multiple serotype candidates	( - )	ND	NA	NA	ND	NG	NG	NG	NG	11	3	0	0	0	0	0	0	0
147	19	13S03807	RNA	D3	Multiple serotype candidates	( - )	ND	NA	ND	ND	NA	NA	NA	NA
148	19	13S03807	RNA	D4	Multiple serotype candidates	( - )	ND	NA	ND	ND	NA	NA	NA	NA
149	19	13S03807	serum	D1	Multiple serotype candidates	( - )	ND	NA	1	NA	D1	NA		NA	257	63	63	2597	148	115	257	25	70	0.833173
150	19	13S03807	serum	D2	Multiple serotype candidates	( - )	ND	NA	2	NA	NG	NG	NG	NG	1501	1158	60	3838	644	89	226	52	115	0.800083
151	19	13S03807	serum	D3	Multiple serotype candidates	( - )	ND	NA	3	NA	D3	NA	Den3:10361:A:C	NA	2722	157	147	8711	660	1393	1975	263	487	0.683806
152	19	13S03807	serum	D4	Multiple serotype candidates	( - )	ND	NA	4	NA	NG	NA	NG	NA	0	0	0	0	0	0	0	0	0
153	20	13S03808	RNA	D1	Not detected	( - )	ND	NA	ND	ND	NA	NA	NA	NA
154	20	13S03808	RNA	D2	Not detected	( - )	2	2	2	134	NG	NG	NG	NG	54	1	0	0	0	0	0	0	0
155	20	13S03808	RNA	D3	Not detected	( - )	ND	NA	ND	ND	NA	NA	NA	NA
156	20	13S03808	RNA	D4	Not detected	( - )	ND	NA	ND	ND	NA	NA	NA	NA
157	20	13S03808	serum	D1	Not detected	( - )	ND	NA	ND	ND	NA	NA	NA	NA
158	20	13S03808	serum	D2	Not detected	( - )	2	NA	2	80	NG	NG	NG	NG	7	1	1	46	1	1	14	1	1	0.741935
159	20	13S03808	serum	D3	Not detected	( - )	ND	NA	ND	ND	NA	NA	NA	NA
160	20	13S03808	serum	D4	Not detected	( - )	ND	NA	ND	ND	NA	NA	NA	NA
161	21	13S03829	RNA	D1	Not detected	( + )	ND	NA	ND	ND	NA	NA	NA	NA
162	21	13S03829	RNA	D2	Not detected	( + )	2	NA	NA	ND	NA	NA	NA	NA
163	21	13S03829	RNA	D3	Not detected	( + )	ND	NA	ND	ND	NA	NA	NA	NA
164	21	13S03829	RNA	D4	Not detected	( + )	ND	NA	ND	ND	NA	NA	NA	NA
165	21	13S03829	serum	D1	Not detected	( + )	ND	NA	ND	ND	NA	NA	NA	NA
166	21	13S03829	serum	D2	Not detected	( + )	2	NA	ND	ND	NG	NG	NG	NG	0	0	0	0	0	0	0	0	0
167	21	13S03829	serum	D3	Not detected	( + )	ND	NA	ND	ND	NA	NA	NA	NA
168	21	13S03829	serum	D4	Not detected	( + )	ND	NA	ND	ND	NA	NA	NA	NA
169	22	13S03835	RNA	D1	Not detected	( + )	ND	NA	ND	ND	NA	NA	NA	NA
170	22	13S03835	RNA	D2	Not detected	( + )	2	2	2	216	NG	NG	NG	NG	104	6	2	70	3	0	2	0	2	0.933333
171	22	13S03835	RNA	D3	Not detected	( + )	ND	NA	ND	ND	NA	NA	NA	NA
172	22	13S03835	RNA	D4	Not detected	( + )	ND	NA	ND	ND	NA	NA	NA	NA
173	22	13S03835	serum	D1	Not detected	( + )	ND	NA	ND	ND	NA	NA	NA	NA
174	22	13S03835	serum	D2	Not detected	( + )	2	NA	ND	ND	NA	NA	NA	NA
175	22	13S03835	serum	D3	Not detected	( + )	ND	NA	ND	ND	NA	NA	NA	NA
176	22	13S03835	serum	D4	Not detected	( + )	ND	NA	ND	ND	NA	NA	NA	NA
177	23	13S03848	RNA	D1	Not detected	( + )	ND	NA	ND	ND	NA	NA	NA	NA
178	23	13S03848	RNA	D2	Not detected	( + )	2	2	2	206	NG	NG	NG	NG	86	3	3	110	9	0	3	0	2	0.901639
179	23	13S03848	RNA	D3	Not detected	( + )	ND	NA	ND	ND	NA	NA	NA	NA
180	23	13S03848	RNA	D4	Not detected	( + )	ND	NA	ND	ND	NA	NA	NA	NA
181	23	13S03848	serum	D1	Not detected	( + )	ND	NA	ND	ND	NG	NA	NG	NA	0	0	0	0	0	0	0	0	0
182	23	13S03848	serum	D2	Not detected	( + )	2	NA	ND	ND	NG	NA	NG	NA	0	0	0	0	0	0	0	0	0
183	23	13S03848	serum	D3	Not detected	( + )	ND	NA	ND	ND	NG	NA	NG	NA	12	3	3	113	10	3	9	2	2	0.837037
184	23	13S03848	serum	D4	Not detected	( + )	ND	NA	ND	ND	NG	NA	NG	NA	3	2	2	312	39	10	14	7	9	0.832
185	24	13S03873	RNA	D1	Serotype determined	( + )	ND	NA	ND	ND	NA	NA	NA	NA
186	24	13S03873	RNA	D2	Serotype determined	( + )	2	2	2	348	D2	NG	Den2:10553:C:T;Den2:10555:A:G;Den2:10570:C:T;Den2:10573:G:A	NG	149	148	141	16663	2500	980	1080	503	620	0.785139
187	24	13S03873	RNA	D3	Serotype determined	( + )	ND	NA	ND	ND	NA	NA	NA	NA
188	24	13S03873	RNA	D4	Serotype determined	( + )	ND	NA	ND	ND	NA	NA	NA	NA
189	24	13S03873	serum	D1	Serotype determined	( + )	ND	NA	ND	ND	NA	NA	NA	NA
190	24	13S03873	serum	D2	Serotype determined	( + )	2	NA	2	124	NG	NG	NG	NG	2	1	0	0	0	0	0	0	0
191	24	13S03873	serum	D3	Serotype determined	( + )	ND	NA	ND	ND	NA	NA	NA	NA
192	24	13S03873	serum	D4	Serotype determined	( + )	ND	NA	ND	ND	NA	NA	NA	NA
193	25	13S03734	RNA	D1	Serotype determined	( + )	ND	NA	ND	ND	NA	NA	NA	NA
194	25	13S03734	RNA	D2	Serotype determined	( + )	ND	NA	ND	ND	NA	NA	NA	NA
195	25	13S03734	RNA	D3	Serotype determined	( + )	3	3	3	219	D3	NG	Den3:10436:A:G	NG	830	199	193	20626	2095	1223	954	596	506	0.82842
196	25	13S03734	RNA	D4	Serotype determined	( + )	ND	NA	ND	ND	NA	NA	NA	NA
197	25	13S03734	serum	D1	Serotype determined	( + )	ND	NA	ND	ND	NA	NA	NA	NA
198	25	13S03734	serum	D2	Serotype determined	( + )	ND	NA	ND	ND	NA	NA	NA	NA
199	25	13S03734	serum	D3	Serotype determined	( + )	3	NA	3	129	D3	NG		NG	1493	127	111	5821	1503	156	387	79	130	0.739926
200	25	13S03734	serum	D4	Serotype determined	( + )	ND	NA	ND	ND	NA	NA	NA	NA
201	26	13S03735	RNA	D1	Serotype determined	( - )	ND	NA	ND	ND	NA	NA	NA	NA
202	26	13S03735	RNA	D2	Serotype determined	( - )	ND	NA	ND	ND	NA	NA	NA	NA
203	26	13S03735	RNA	D3	Serotype determined	( - )	3	NA	3	230	D3	D3			91	20	20	1408	166	78	161	47	44	0.776613
204	26	13S03735	RNA	D4	Serotype determined	( - )	ND	NA	ND	ND	NA	NA	NA	NA
205	26	13S03735	serum	D1	Serotype determined	( - )	ND	NA	ND	ND	NA	NA	NA	NA
206	26	13S03735	serum	D2	Serotype determined	( - )	ND	NA	ND	ND	NA	NA	NA	NA
207	26	13S03735	serum	D3	Serotype determined	( - )	3	NA	ND	ND	NA	NA	NA	NA
208	26	13S03735	serum	D4	Serotype determined	( - )	ND	NA	ND	ND	NA	NA	NA	NA
209	27	13S03743	RNA	D1	Serotype determined	( + )	ND	NA	ND	ND	NA	NA	NA	NA
210	27	13S03743	RNA	D2	Serotype determined	( + )	ND	NA	ND	ND	NA	NA	NA	NA
211	27	13S03743	RNA	D3	Serotype determined	( + )	3	NA	3	79	D3	NG		NG	56	16	16	1042	87	39	173	27	41	0.777032
212	27	13S03743	RNA	D4	Serotype determined	( + )	ND	NA	ND	ND	NA	NA	NA	NA
213	27	13S03743	serum	D1	Serotype determined	( + )	ND	NA	ND	ND	NA	NA	NA	NA
214	27	13S03743	serum	D2	Serotype determined	( + )	ND	NA	ND	ND	NA	NA	NA	NA
215	27	13S03743	serum	D3	Serotype determined	( + )	3	NA	3	NA	NG	NG	NG	NG	191	0	0	0	0	0	0	0	0
216	27	13S03743	serum	D4	Serotype determined	( + )	ND	NA	ND	ND	NA	NA	NA	NA
217	28	13S03746	RNA	D1	Serotype determined	( - )	ND	NA	ND	ND	NA	NA	NA	NA
218	28	13S03746	RNA	D2	Serotype determined	( - )	ND	NA	ND	ND	NA	NA	NA	NA
219	28	13S03746	RNA	D3	Serotype determined	( - )	3	3	3	180	D3	D3	Den3:10436:A:G	Den3:10436:A:G	66	54	54	5591	814	388	324	194	206	0.785584
220	28	13S03746	RNA	D4	Serotype determined	( - )	ND	NA	ND	ND	NA	NA	NA	NA
221	28	13S03746	serum	D1	Serotype determined	( - )	ND	NA	ND	ND	NA	NA	NA	NA
222	28	13S03746	serum	D2	Serotype determined	( - )	ND	NA	ND	ND	NA	NA	NA	NA
223	28	13S03746	serum	D3	Serotype determined	( - )	3	NA	3	134	D3	D3	Den3:10436:A:G	Den3:10436:A:G	2745	2707	2706	331882	35864	13049	15622	7022	9547	0.837204
224	28	13S03746	serum	D4	Serotype determined	( - )	ND	NA	ND	ND	NA	NA	NA	NA
225	29	13S03755	RNA	D1	Serotype determined	( + )	ND	NA	ND	ND	NA	NA	NA	NA
226	29	13S03755	RNA	D2	Serotype determined	( + )	ND	NA	ND	ND	NA	NA	NA	NA
227	29	13S03755	RNA	D3	Serotype determined	( + )	3	3	3	123	D3	NG		NG	37	7	7	405	32	11	58	7	11	0.800395
228	29	13S03755	RNA	D4	Serotype determined	( + )	ND	NA	ND	ND	NA	NA	NA	NA
229	29	13S03755	serum	D1	Serotype determined	( + )	ND	NA	ND	ND	NA	NA	NA	NA
230	29	13S03755	serum	D2	Serotype determined	( + )	ND	NA	ND	ND	NA	NA	NA	NA
231	29	13S03755	serum	D3	Serotype determined	( + )	3	NA	3	190	D3	NG		NG	1865	46	44	2840	523	571	198	139	46	0.687318
232	29	13S03755	serum	D4	Serotype determined	( + )	ND	NA	ND	ND	NA	NA	NA	NA
233	30	13S03761	RNA	D1	Serotype determined	( - )	ND	NA	ND	ND	NA	NA	NA	NA
234	30	13S03761	RNA	D2	Serotype determined	( - )	ND	NA	ND	ND	NA	NA	NA	NA
235	30	13S03761	RNA	D3	Serotype determined	( - )	3	NA	3	166	D3	NG		NG	151	11	11	724	83	20	112	12	35	0.771033
236	30	13S03761	RNA	D4	Serotype determined	( - )	ND	NA	ND	ND	NA	NA	NA	NA
237	30	13S03761	serum	D1	Serotype determined	( - )	ND	NA	ND	ND	NA	NA	NA	NA
238	30	13S03761	serum	D2	Serotype determined	( - )	ND	NA	ND	ND	NA	NA	NA	NA
239	30	13S03761	serum	D3	Serotype determined	( - )	3	NA	3	72	D3	NG		NG	1648	26	25	1139	70	13	446	6	44	0.682854
240	30	13S03761	serum	D4	Serotype determined	( - )	ND	NA	ND	ND	NA	NA	NA	NA
241	31	13S03763	RNA	D1	Serotype undetermined	( - )	ND	NA	ND	ND	NG	NA	NG	NA	1	1	1	111	22	4	4	3	4	0.787234
242	31	13S03763	RNA	D2	Serotype undetermined	( - )	ND	NA	ND	ND	NG	NA	NG	NA	0	0	0	0	0	0	0	0	0
243	31	13S03763	RNA	D3	Serotype undetermined	( - )	ND	3	3	NA	D3	D3	Den3:10436:A:G	Den3:10436:A:G	76	26	26	2215	244	106	161	61	59	0.812546
244	31	13S03763	RNA	D4	Serotype undetermined	( - )	ND	NA	ND	ND	NG	NA	NG	NA	1	1	1	159	15	4	13	3	7	0.832461
245	31	13S03763	serum	D1	Serotype undetermined	( - )	ND	NA	1	NA	D1	NA		NA	73	31	29	1386	101	248	97	40	20	0.75655
246	31	13S03763	serum	D2	Serotype undetermined	( - )	ND	NA	2	NA	NG	NA	NG	NA	16	7	0	0	0	0	0	0	0
247	31	13S03763	serum	D3	Serotype undetermined	( - )	ND	NA	3	78	NG	NG	NG	NG	2138	145	35	1679	157	37	462	15	59	0.719058
248	31	13S03763	serum	D4	Serotype undetermined	( - )	ND	NA	4	NA	D4	NA	Den4:10388:G:T	NA	57	53	53	6317	1211	378	387	194	195	0.761727
249	32	13S03764	RNA	D1	Multiple serotype candidates	( + )	ND	NA	ND	ND	NG	NA	NG	NA	2	2	2	233	33	9	12	5	6	0.811847
250	32	13S03764	RNA	D2	Multiple serotype candidates	( + )	ND	NA	ND	ND	NG	NA	NG	NA	0	0	0	0	0	0	0	0	0
251	32	13S03764	RNA	D3	Multiple serotype candidates	( + )	3	3	3	NA	D3	D3	Den3:10436:A:G	Den3:10436:A:G	90	84	84	9929	1349	527	627	279	382	0.798665
252	32	13S03764	RNA	D4	Multiple serotype candidates	( + )	ND	NA	ND	ND	D4	NA		NA	151	149	149	17742	2781	672	968	389	562	0.800523
253	32	13S03764	serum	D1	Multiple serotype candidates	( + )	ND	NA	ND	ND	NA	NA	NA	NA
254	32	13S03764	serum	D2	Multiple serotype candidates	( + )	ND	NA	ND	ND	NA	NA	NA	NA
255	32	13S03764	serum	D3	Multiple serotype candidates	( + )	3	NA	3	65	NG	NG	NG	NG	17	1	0	0	0	0	0	0	0
256	32	13S03764	serum	D4	Multiple serotype candidates	( + )	ND	NA	ND	ND	NA	NA	NA	NA
257	33	13S03765	RNA	D1	Serotype determined	( - )	ND	NA	ND	ND	NA	NA	NA	NA
258	33	13S03765	RNA	D2	Serotype determined	( - )	ND	NA	ND	ND	NA	NA	NA	NA
259	33	13S03765	RNA	D3	Serotype determined	( - )	3	NA	3	140	D3	NG		NG	1128	164	161	6327	302	129	977	117	146	0.81797
260	33	13S03765	RNA	D4	Serotype determined	( - )	ND	NA	ND	ND	NA	NA	NA	NA
261	33	13S03765	serum	D1	Serotype determined	( - )	ND	NA	ND	ND	NA	NA	NA	NA
262	33	13S03765	serum	D2	Serotype determined	( - )	ND	NA	ND	ND	NA	NA	NA	NA
263	33	13S03765	serum	D3	Serotype determined	( - )	3	NA	3	148	NG	NG	NG	NG	211	0	0	0	0	0	0	0	0
264	33	13S03765	serum	D4	Serotype determined	( - )	ND	NA	ND	ND	NA	NA	NA	NA
265	34	13S03770	RNA	D1	Serotype determined	( + )	ND	NA	ND	ND	NA	NA	NA	NA
266	34	13S03770	RNA	D2	Serotype determined	( + )	ND	NA	ND	ND	NA	NA	NA	NA
267	34	13S03770	RNA	D3	Serotype determined	( + )	3	3	3	146	NG	NG	NG	NG	140	6	6	426	78	25	12	12	11	0.787431
268	34	13S03770	RNA	D4	Serotype determined	( + )	ND	NA	ND	ND	NA	NA	NA	NA
269	34	13S03770	serum	D1	Serotype determined	( + )	ND	NA	ND	ND	NA	NA	NA	NA
270	34	13S03770	serum	D2	Serotype determined	( + )	ND	NA	ND	ND	NA	NA	NA	NA
271	34	13S03770	serum	D3	Serotype determined	( + )	3	NA	3	118	D3	D3	Den3:10436:A:G	Den3:10436:A:G	1026	1003	1003	115939	14298	6349	6074	3306	4055	0.812695
272	34	13S03770	serum	D4	Serotype determined	( + )	ND	NA	ND	ND	NA	NA	NA	NA
273	35	13S03771	RNA	D1	Serotype determined	( + )	ND	NA	ND	ND	NA	NA	NA	NA
274	35	13S03771	RNA	D2	Serotype determined	( + )	ND	NA	ND	ND	NA	NA	NA	NA
275	35	13S03771	RNA	D3	Serotype determined	( + )	3	3	3	178	NG	NG	NG	NG	12	2	2	132	5	2	77	2	7	0.611111
276	35	13S03771	RNA	D4	Serotype determined	( + )	ND	NA	ND	ND	NA	NA	NA	NA
277	35	13S03771	serum	D1	Serotype determined	( + )	ND	NA	ND	ND	NA	NA	NA	NA
278	35	13S03771	serum	D2	Serotype determined	( + )	ND	NA	ND	ND	NA	NA	NA	NA
279	35	13S03771	serum	D3	Serotype determined	( + )	3	NA	3	194	D3	NG		NG	799	84	82	4061	490	607	210	225	51	0.75652
280	35	13S03771	serum	D4	Serotype determined	( + )	ND	NA	ND	ND	NA	NA	NA	NA
281	36	13S03775	RNA	D1	Not detected	( + )	ND	NA	ND	ND	NA	NA	NA	NA
282	36	13S03775	RNA	D2	Not detected	( + )	ND	NA	ND	ND	NA	NA	NA	NA
283	36	13S03775	RNA	D3	Not detected	( + )	3	NA	3	287	NG	NG	NG	NG	146	7	7	527	89	28	54	17	22	0.755014
284	36	13S03775	RNA	D4	Not detected	( + )	ND	NA	ND	ND	NA	NA	NA	NA
285	36	13S03775	serum	D1	Not detected	( + )	ND	NA	ND	ND	NA	NA	NA	NA
286	36	13S03775	serum	D2	Not detected	( + )	ND	NA	ND	ND	NA	NA	NA	NA
287	36	13S03775	serum	D3	Not detected	( + )	3	NA	ND	ND	NA	NA	NA	NA
288	36	13S03775	serum	D4	Not detected	( + )	ND	NA	ND	ND	NA	NA	NA	NA
289	37	13S03776	RNA	D1	Multiple serotype candidates	( + )	ND	NA	ND	ND	NA	NA	NA	NA
290	37	13S03776	RNA	D2	Multiple serotype candidates	( + )	ND	NA	ND	ND	NA	NA	NA	NA
291	37	13S03776	RNA	D3	Multiple serotype candidates	( + )	3	3	3	155	D3	NG		NG	761	214	213	8723	450	244	1666	198	243	0.787061
292	37	13S03776	RNA	D4	Multiple serotype candidates	( + )	ND	NA	ND	ND	NA	NA	NA	NA
293	37	13S03776	serum	D1	Multiple serotype candidates	( + )	ND	NA	ND	ND	NG	NA	NG	NA	0	0	0	0	0	0	0	0	0
294	37	13S03776	serum	D2	Multiple serotype candidates	( + )	ND	NA	ND	ND	NG	NA	NG	NA	7	3	3	118	6	1	5	1	3	0.907692
295	37	13S03776	serum	D3	Multiple serotype candidates	( + )	3	NA	3	135	D3	D3	Den3:10436:A:G	Den3:10436:A:G	1444	1433	1433	176128	20944	8589	7631	4534	5010	0.82576
296	37	13S03776	serum	D4	Multiple serotype candidates	( + )	ND	NA	ND	ND	D4	NA	Den4:10388:G:T	NA	183	168	167	19258	3817	1354	1181	611	630	0.751972
297	38	13S03780	RNA	D1	Multiple serotype candidates	( - )	ND	NA	1	NA	D1	NA		NA	64	32	32	1942	265	247	192	69	46	0.733938
298	38	13S03780	RNA	D2	Multiple serotype candidates	( - )	ND	NA	2	NA	NG	NA	NG	NA	0	0	0	0	0	0	0	0	0
299	38	13S03780	RNA	D3	Multiple serotype candidates	( - )	ND	3	3	NA	D3	D3		Den3:10436:A:G	88	35	35	2564	268	119	268	74	50	0.796521
300	38	13S03780	RNA	D4	Multiple serotype candidates	( - )	ND	NA	4	NA	D4	NA		NA	89	87	87	10731	1777	459	659	258	351	0.787539
301	38	13S03780	serum	D1	Multiple serotype candidates	( - )	ND	NA	ND	ND	NA	NA	NA	NA
302	38	13S03780	serum	D2	Multiple serotype candidates	( - )	ND	NA	ND	ND	NA	NA	NA	NA
303	38	13S03780	serum	D3	Multiple serotype candidates	( - )	ND	NA	3	161	D3	NG		NG	571	55	55	2264	192	163	139	53	69	0.820885
304	38	13S03780	serum	D4	Multiple serotype candidates	( - )	ND	NA	ND	ND	NA	NA	NA	NA
305	39	13S03789	RNA	D1	Multiple serotype candidates	( + )	ND	NA	1	NA	D1	NA		NA	58	56	55	5270	520	88	439	57	211	0.834257
306	39	13S03789	RNA	D2	Multiple serotype candidates	( + )	ND	NA	2	NA	NG	NA	NG	NA	0	0	0	0	0	0	0	0	0
307	39	13S03789	RNA	D3	Multiple serotype candidates	( + )	3	3	3	NA	D3	D3	Den3:10436:A:G	Den3:10436:A:G	55	53	53	6264	854	294	321	156	212	0.810035
308	39	13S03789	RNA	D4	Multiple serotype candidates	( + )	ND	NA	4	NA	D4	NA		NA	74	72	72	8661	1563	343	611	184	323	0.774826
309	39	13S03789	serum	D1	Multiple serotype candidates	( + )	ND	NA	ND	ND	NA	NA	NA	NA
310	39	13S03789	serum	D2	Multiple serotype candidates	( + )	ND	NA	ND	ND	NA	NA	NA	NA
311	39	13S03789	serum	D3	Multiple serotype candidates	( + )	3	NA	ND	ND	NA	NA	NA	NA
312	39	13S03789	serum	D4	Multiple serotype candidates	( + )	ND	NA	ND	ND	NA	NA	NA	NA
313	40	13S03791	RNA	D1	Serotype determined	( - )	ND	NA	ND	ND	NA	NA	NA	NA
314	40	13S03791	RNA	D2	Serotype determined	( - )	ND	NA	ND	ND	NA	NA	NA	NA
315	40	13S03791	RNA	D3	Serotype determined	( - )	3	NA	3	163	D3	NG		NG	132	11	11	490	30	6	95	3	25	0.78905
316	40	13S03791	RNA	D4	Serotype determined	( - )	ND	NA	ND	ND	NA	NA	NA	NA
317	40	13S03791	serum	D1	Serotype determined	( - )	ND	NA	ND	ND	NA	NA	NA	NA
318	40	13S03791	serum	D2	Serotype determined	( - )	ND	NA	ND	ND	NA	NA	NA	NA
319	40	13S03791	serum	D3	Serotype determined	( - )	3	ND	3	177	D3	NG		NG	828	57	55	2568	262	335	150	95	51	0.774661
320	40	13S03791	serum	D4	Serotype determined	( - )	ND	NA	ND	ND	NA	NA	NA	NA
321	41	13S03792	RNA	D1	Serotype determined	( + )	ND	NA	ND	ND	NA	NA	NA	NA
322	41	13S03792	RNA	D2	Serotype determined	( + )	ND	NA	ND	ND	NA	NA	NA	NA
323	41	13S03792	RNA	D3	Serotype determined	( + )	3	3	3	188	D3	D3	Den3:10436:A:G	Den3:10436:A:G	212	122	122	11847	2101	819	649	429	386	0.768487
324	41	13S03792	RNA	D4	Serotype determined	( + )	ND	NA	ND	ND	NA	NA	NA	NA
325	41	13S03792	serum	D1	Serotype determined	( + )	ND	NA	ND	ND	NA	NA	NA	NA
326	41	13S03792	serum	D2	Serotype determined	( + )	ND	NA	ND	ND	NA	NA	NA	NA
327	41	13S03792	serum	D3	Serotype determined	( + )	3	NA	3	99	NG	NG	NG	NG	0	0	0	0	0	0	0	0	0
328	41	13S03792	serum	D4	Serotype determined	( + )	ND	NA	ND	ND	NA	NA	NA	NA
329	42	13S03805	RNA	D1	Not detected	( + )	ND	NA	ND	ND	NA	NA	NA	NA
330	42	13S03805	RNA	D2	Not detected	( + )	ND	NA	ND	ND	NA	NA	NA	NA
331	42	13S03805	RNA	D3	Not detected	( + )	3	NA	3	165	NG	NG	NG	NG	91	4	4	290	29	17	103	9	16	0.660592
332	42	13S03805	RNA	D4	Not detected	( + )	ND	NA	ND	ND	NA	NA	NA	NA
333	42	13S03805	serum	D1	Not detected	( + )	ND	NA	ND	ND	NA	NA	NA	NA
334	42	13S03805	serum	D2	Not detected	( + )	ND	NA	ND	ND	NA	NA	NA	NA
335	42	13S03805	serum	D3	Not detected	( + )	3	NA	3	147	NG	NG	NG	NG	151	1	0	0	0	0	0	0	0
336	42	13S03805	serum	D4	Not detected	( + )	ND	NA	ND	ND	NA	NA	NA	NA
337	43	13S03810	RNA	D1	Multiple serotype candidates	( + )	ND	NA	1	NA	D1	NA	Den1:10551:G:A	NA	82	23	20	1046	104	40	158	13	46	0.775964
338	43	13S03810	RNA	D2	Multiple serotype candidates	( + )	ND	NA	2	NA	NG	NA	NG	NA	0	0	0	0	0	0	0	0	0
339	43	13S03810	RNA	D3	Multiple serotype candidates	( + )	3	3	3	NA	NG	D3	NG	Den3:10436:A:G	0	0	0	0	0	0	0	0	0
340	43	13S03810	RNA	D4	Multiple serotype candidates	( + )	ND	NA	4	NA	D4	NA		NA	103	102	102	11941	1980	490	729	275	431	0.788705
341	43	13S03810	serum	D1	Multiple serotype candidates	( + )	ND	NA	ND	ND	NA	NA	NA	NA
342	43	13S03810	serum	D2	Multiple serotype candidates	( + )	ND	NA	ND	ND	NA	NA	NA	NA
343	43	13S03810	serum	D3	Multiple serotype candidates	( + )	3	NA	3	224	NG	NG	NG	NG	227	1	0	0	0	0	0	0	0
344	43	13S03810	serum	D4	Multiple serotype candidates	( + )	ND	NA	ND	ND	NA	NA	NA	NA
345	44	13S03813	RNA	D1	Serotype determined	( + )	ND	NA	ND	ND	NA	NA	NA	NA
346	44	13S03813	RNA	D2	Serotype determined	( + )	ND	NA	ND	ND	NA	NA	NA	NA
347	44	13S03813	RNA	D3	Serotype determined	( + )	3	3	3	139	NG	NG	NG	NG	2	0	0	0	0	0	0	0	0
348	44	13S03813	RNA	D4	Serotype determined	( + )	ND	NA	ND	ND	NA	NA	NA	NA
349	44	13S03813	serum	D1	Serotype determined	( + )	ND	NA	ND	ND	NA	NA	NA	NA
350	44	13S03813	serum	D2	Serotype determined	( + )	ND	NA	ND	ND	NA	NA	NA	NA
351	44	13S03813	serum	D3	Serotype determined	( + )	3	NA	3	NA	D3	NG		NG	214	16	15	957	134	61	137	35	30	0.742436
352	44	13S03813	serum	D4	Serotype determined	( + )	ND	NA	ND	ND	NA	NA	NA	NA
353	45	13S03815	RNA	D1	Not detected	( + )	ND	NA	ND	ND	NA	NA	NA	NA
354	45	13S03815	RNA	D2	Not detected	( + )	ND	NA	ND	ND	NA	NA	NA	NA
355	45	13S03815	RNA	D3	Not detected	( + )	3	NA	3	159	NG	NG	NG	NG	24	2	2	98	4	2	41	1	4	0.675862
356	45	13S03815	RNA	D4	Not detected	( + )	ND	NA	ND	ND	NA	NA	NA	NA
357	45	13S03815	serum	D1	Not detected	( + )	ND	NA	ND	ND	NA	NA	NA	NA
358	45	13S03815	serum	D2	Not detected	( + )	ND	NA	ND	ND	NA	NA	NA	NA
359	45	13S03815	serum	D3	Not detected	( + )	3	NA	3	120	NG	NG	NG	NG	167	0	0	0	0	0	0	0	0
360	45	13S03815	serum	D4	Not detected	( + )	ND	NA	ND	ND	NA	NA	NA	NA
361	46	13S03818	RNA	D1	Serotype determined	( + )	ND	NA	ND	ND	NA	NA	NA	NA
362	46	13S03818	RNA	D2	Serotype determined	( + )	ND	NA	ND	ND	NA	NA	NA	NA
363	46	13S03818	RNA	D3	Serotype determined	( + )	3	3	3	166	NG	NG	NG	NG	7	3	3	105	5	2	3	2	2	0.913043
364	46	13S03818	RNA	D4	Serotype determined	( + )	ND	NA	ND	ND	NA	NA	NA	NA
365	46	13S03818	serum	D1	Serotype determined	( + )	ND	NA	ND	ND	NA	NA	NA	NA
366	46	13S03818	serum	D2	Serotype determined	( + )	ND	NA	ND	ND	NA	NA	NA	NA
367	46	13S03818	serum	D3	Serotype determined	( + )	3	NA	3	142	D3	D3	Den3:10436:A:G	Den3:10436:A:G	454	183	181	17380	1918	891	856	479	512	0.825849
368	46	13S03818	serum	D4	Serotype determined	( + )	ND	NA	ND	ND	NA	NA	NA	NA
369	47	13S03819	RNA	D1	Serotype determined	( + )	ND	NA	ND	ND	NA	NA	NA	NA
370	47	13S03819	RNA	D2	Serotype determined	( + )	ND	NA	ND	ND	NA	NA	NA	NA
371	47	13S03819	RNA	D3	Serotype determined	( + )	3	NA	3	217	NG	NG	NG	NG	35	6	6	251	21	5	27	3	9	0.825658
372	47	13S03819	RNA	D4	Serotype determined	( + )	ND	NA	ND	ND	NA	NA	NA	NA
373	47	13S03819	serum	D1	Serotype determined	( + )	ND	NA	ND	ND	NA	NA	NA	NA
374	47	13S03819	serum	D2	Serotype determined	( + )	ND	NA	ND	ND	NA	NA	NA	NA
375	47	13S03819	serum	D3	Serotype determined	( + )	3	NA	3	158	D3	NG		NG	1146	176	176	7196	370	113	1350	48	318	0.796987
376	47	13S03819	serum	D4	Serotype determined	( + )	ND	NA	ND	ND	NA	NA	NA	NA
377	48	13S03821	RNA	D1	Multiple serotype candidates	( + )	ND	NA	ND	ND	NG	NA	NG	NA	10	6	5	277	32	22	16	7	8	0.798271
378	48	13S03821	RNA	D2	Multiple serotype candidates	( + )	ND	NA	ND	ND	NG	NA	NG	NA	0	0	0	0	0	0	0	0	0
379	48	13S03821	RNA	D3	Multiple serotype candidates	( + )	3	NA	3	NA	D3	NG		NG	69	21	21	1216	103	32	193	20	45	0.787565
380	48	13S03821	RNA	D4	Multiple serotype candidates	( + )	ND	NA	ND	ND	D4	NA		NA	123	122	122	15070	2511	612	758	371	454	0.795209
381	48	13S03821	serum	D1	Multiple serotype candidates	( + )	ND	NA	ND	ND	NA	NA	NA	NA
382	48	13S03821	serum	D2	Multiple serotype candidates	( + )	ND	NA	ND	ND	NA	NA	NA	NA
383	48	13S03821	serum	D3	Multiple serotype candidates	( + )	3	NA	3	230	NG	NG	NG	NG	3	0	0	0	0	0	0	0	0
384	48	13S03821	serum	D4	Multiple serotype candidates	( + )	ND	NA	ND	ND	NA	NA	NA	NA
385	49	13S03827	RNA	D1	Multiple serotype candidates	( + )	ND	NA	1	NA	D1	NA	Den1:10527:C:T;Den1:10581:C:G	NA	51	51	51	5055	572	118	395	80	215	0.82329
386	49	13S03827	RNA	D2	Multiple serotype candidates	( + )	ND	NA	2	NA	NG	NA	NG	NA	0	0	0	0	0	0	0	0	0
387	49	13S03827	RNA	D3	Multiple serotype candidates	( + )	3	3	3	NA	D3	D3	Den3:10436:A:G	Den3:10436:A:G	39	36	36	4331	521	226	201	119	135	0.820421
388	49	13S03827	RNA	D4	Multiple serotype candidates	( + )	ND	NA	4	NA	D4	NA		NA	63	62	61	7657	1214	314	459	194	251	0.793965
389	49	13S03827	serum	D1	Multiple serotype candidates	( + )	ND	NA	ND	ND	NG	NA	NG	NA	171	0	1	84	8	6	53	2	5	0.556291
390	49	13S03827	serum	D2	Multiple serotype candidates	( + )	ND	NA	ND	ND	NG	NA	NG	NA	0	0	0	0	0	0	0	0	0
391	49	13S03827	serum	D3	Multiple serotype candidates	( + )	3	NA	3	NA	D3	NG		NG	96	13	13	556	29	20	123	11	17	0.763736
392	49	13S03827	serum	D4	Multiple serotype candidates	( + )	ND	NA	ND	ND	D4	NA		NA	24	23	23	2864	425	116	161	67	87	0.803141
393	50	13S03828	RNA	D1	Serotype determined	( + )	ND	NA	ND	ND	NA	NA	NA	NA
394	50	13S03828	RNA	D2	Serotype determined	( + )	ND	NA	ND	ND	NA	NA	NA	NA
395	50	13S03828	RNA	D3	Serotype determined	( + )	3	3	3	236	NG	NG	NG	NG	28	5	5	168	5	4	1	4	1	0.94382
396	50	13S03828	RNA	D4	Serotype determined	( + )	ND	NA	ND	ND	NA	NA	NA	NA
397	50	13S03828	serum	D1	Serotype determined	( + )	ND	NA	ND	ND	NA	NA	NA	NA
398	50	13S03828	serum	D2	Serotype determined	( + )	ND	NA	ND	ND	NA	NA	NA	NA
399	50	13S03828	serum	D3	Serotype determined	( + )	3	NA	3	97	D3	NG		NG	415	44	44	1660	78	35	195	33	37	0.843496
400	50	13S03828	serum	D4	Serotype determined	( + )	ND	NA	ND	ND	NA	NA	NA	NA
401	51	13S03832	RNA	D1	Serotype determined	( + )	ND	NA	ND	ND	NA	NA	NA	NA
402	51	13S03832	RNA	D2	Serotype determined	( + )	ND	NA	ND	ND	NA	NA	NA	NA
403	51	13S03832	RNA	D3	Serotype determined	( + )	3	NA	3	148	NG	NG	NG	NG	25	7	7	275	9	0	53	0	11	0.816024
404	51	13S03832	RNA	D4	Serotype determined	( + )	ND	NA	ND	ND	NA	NA	NA	NA
405	51	13S03832	serum	D1	Serotype determined	( + )	ND	NA	ND	ND	NA	NA	NA	NA
406	51	13S03832	serum	D2	Serotype determined	( + )	ND	NA	ND	ND	NA	NA	NA	NA
407	51	13S03832	serum	D3	Serotype determined	( + )	3	NA	3	203	D3	D3		Den3:10436:A:G	354	51	51	4088	571	162	294	105	151	0.799218
408	51	13S03832	serum	D4	Serotype determined	( + )	ND	NA	ND	ND	NA	NA	NA	NA
409	52	13S03836	RNA	D1	Not detected	( + )	ND	NA	ND	ND	NA	NA	NA	NA
410	52	13S03836	RNA	D2	Not detected	( + )	ND	NA	ND	ND	NA	NA	NA	NA
411	52	13S03836	RNA	D3	Not detected	( + )	3	NA	3	166	NG	NG	NG	NG	29	0	0	0	0	0	0	0	0
412	52	13S03836	RNA	D4	Not detected	( + )	ND	NA	ND	ND	NA	NA	NA	NA
413	52	13S03836	serum	D1	Not detected	( + )	ND	NA	ND	ND	NA	NA	NA	NA
414	52	13S03836	serum	D2	Not detected	( + )	ND	NA	ND	ND	NA	NA	NA	NA
415	52	13S03836	serum	D3	Not detected	( + )	3	NA	3	NA	NG	D3	NG	Den3:10436:A:G	48	38	2	64	3	2	0	2	0	0.927536
416	52	13S03836	serum	D4	Not detected	( + )	ND	NA	ND	ND	NA	NA	NA	NA
417	53	13S03837	RNA	D1	Serotype determined	( - )	ND	NA	ND	ND	NA	NA	NA	NA
418	53	13S03837	RNA	D2	Serotype determined	( - )	ND	NA	ND	ND	NA	NA	NA	NA
419	53	13S03837	RNA	D3	Serotype determined	( - )	ND	NA	3	179	NG	NG	NG	NG	17	7	7	273	10	2	46	2	9	0.824773
420	53	13S03837	RNA	D4	Serotype determined	( - )	ND	NA	ND	ND	NA	NA	NA	NA
421	53	13S03837	serum	D1	Serotype determined	( - )	ND	NA	ND	ND	NA	NA	NA	NA
422	53	13S03837	serum	D2	Serotype determined	( - )	ND	NA	ND	ND	NA	NA	NA	NA
423	53	13S03837	serum	D3	Serotype determined	( - )	ND	NA	3	138	D3	NG		NG	347	42	42	1629	106	39	191	28	42	0.829008
424	53	13S03837	serum	D4	Serotype determined	( - )	ND	NA	ND	ND	NA	NA	NA	NA
425	54	13S03838	RNA	D1	Not detected	( + )	ND	NA	ND	ND	NA	NA	NA	NA
426	54	13S03838	RNA	D2	Not detected	( + )	ND	NA	ND	ND	NA	NA	NA	NA
427	54	13S03838	RNA	D3	Not detected	( + )	3	NA	3	188	NG	NG	NG	NG	40	2	2	70	2	1	2	1	2	0.933333
428	54	13S03838	RNA	D4	Not detected	( + )	ND	NA	ND	ND	NA	NA	NA	NA
429	54	13S03838	serum	D1	Not detected	( + )	ND	NA	ND	ND	NA	NA	NA	NA
430	54	13S03838	serum	D2	Not detected	( + )	ND	NA	ND	ND	NA	NA	NA	NA
431	54	13S03838	serum	D3	Not detected	( + )	3	NA	3	146	NG	NG	NG	NG	6	0	0	0	0	0	0	0	0
432	54	13S03838	serum	D4	Not detected	( + )	ND	NA	ND	ND	NA	NA	NA	NA
433	55	13S03839	RNA	D1	Not detected	( + )	ND	NA	ND	ND	NA	NA	NA	NA
434	55	13S03839	RNA	D2	Not detected	( + )	ND	NA	ND	ND	NA	NA	NA	NA
435	55	13S03839	RNA	D3	Not detected	( + )	3	NA	3	194	NG	NG	NG	NG	16	1	0	0	0	0	0	0	0
436	55	13S03839	RNA	D4	Not detected	( + )	ND	NA	ND	ND	NA	NA	NA	NA
437	55	13S03839	serum	D1	Not detected	( + )	ND	NA	ND	ND	NA	NA	NA	NA
438	55	13S03839	serum	D2	Not detected	( + )	ND	NA	ND	ND	NA	NA	NA	NA
439	55	13S03839	serum	D3	Not detected	( + )	3	NA	3	121	NG	NG	NG	NG	2	0	0	0	0	0	0	0	0
440	55	13S03839	serum	D4	Not detected	( + )	ND	NA	ND	ND	NA	NA	NA	NA
441	56	13S03841	RNA	D1	Serotype determined	( + )	ND	NA	ND	ND	NA	NA	NA	NA
442	56	13S03841	RNA	D2	Serotype determined	( + )	ND	NA	ND	ND	NA	NA	NA	NA
443	56	13S03841	RNA	D3	Serotype determined	( + )	3	3	3	212	D3	NG		NG	1562	35	35	2236	283	429	309	109	53	0.686521
444	56	13S03841	RNA	D4	Serotype determined	( + )	ND	NA	ND	ND	NA	NA	NA	NA
445	56	13S03841	serum	D1	Serotype determined	( + )	ND	NA	ND	ND	NA	NA	NA	NA
446	56	13S03841	serum	D2	Serotype determined	( + )	ND	NA	ND	ND	NA	NA	NA	NA
447	56	13S03841	serum	D3	Serotype determined	( + )	3	NA	3	213	NG	NG	NG	NG	254	0	0	0	0	0	0	0	0
448	56	13S03841	serum	D4	Serotype determined	( + )	ND	NA	ND	ND	NA	NA	NA	NA
449	57	13S03843	RNA	D1	Serotype determined	( + )	ND	NA	ND	ND	NA	NA	NA	NA
450	57	13S03843	RNA	D2	Serotype determined	( + )	ND	NA	ND	ND	NA	NA	NA	NA
451	57	13S03843	RNA	D3	Serotype determined	( + )	3	3	3	250	D3	D3	Den3:10436:A:G	Den3:10436:A:G	36	34	33	3300	437	169	221	91	124	0.799612
452	57	13S03843	RNA	D4	Serotype determined	( + )	ND	NA	ND	ND	NA	NA	NA	NA
453	57	13S03843	serum	D1	Serotype determined	( + )	ND	NA	ND	ND	NA	NA	NA	NA
454	57	13S03843	serum	D2	Serotype determined	( + )	ND	NA	ND	ND	NA	NA	NA	NA
455	57	13S03843	serum	D3	Serotype determined	( + )	3	NA	3	144	NG	NG	NG	NG	1	0	0	0	0	0	0	0	0
456	57	13S03843	serum	D4	Serotype determined	( + )	ND	NA	ND	ND	NA	NA	NA	NA
457	58	13S03855	RNA	D1	Serotype determined	( + )	ND	NA	ND	ND	NA	NA	NA	NA
458	58	13S03855	RNA	D2	Serotype determined	( + )	ND	NA	ND	ND	NA	NA	NA	NA
459	58	13S03855	RNA	D3	Serotype determined	( + )	3	3	3	317	D3	D3	Den3:10436:A:G	Den3:10436:A:G	38	32	32	3346	447	229	146	107	99	0.802783
460	58	13S03855	RNA	D4	Serotype determined	( + )	ND	NA	ND	ND	NA	NA	NA	NA
461	58	13S03855	serum	D1	Serotype determined	( + )	ND	NA	ND	ND	NA	NA	NA	NA
462	58	13S03855	serum	D2	Serotype determined	( + )	ND	NA	ND	ND	NA	NA	NA	NA
463	58	13S03855	serum	D3	Serotype determined	( + )	3	NA	3	203	NG	NG	NG	NG	5	0	0	0	0	0	0	0	0
464	58	13S03855	serum	D4	Serotype determined	( + )	ND	NA	ND	ND	NA	NA	NA	NA
465	59	13S03858	RNA	D1	Not detected	( + )	ND	NA	ND	ND	NA	NA	NA	NA
466	59	13S03858	RNA	D2	Not detected	( + )	ND	NA	ND	ND	NA	NA	NA	NA
467	59	13S03858	RNA	D3	Not detected	( + )	3	NA	3	216	NG	NG	NG	NG	995	14	8	369	24	7	108	3	19	0.726378
468	59	13S03858	RNA	D4	Not detected	( + )	ND	NA	ND	ND	NA	NA	NA	NA
469	59	13S03858	serum	D1	Not detected	( + )	ND	NA	ND	ND	NA	NA	NA	NA
470	59	13S03858	serum	D2	Not detected	( + )	ND	NA	ND	ND	NA	NA	NA	NA
471	59	13S03858	serum	D3	Not detected	( + )	3	NA	3	180	NG	NG	NG	NG	218	0	0	0	0	0	0	0	0
472	59	13S03858	serum	D4	Not detected	( + )	ND	NA	ND	ND	NA	NA	NA	NA
473	60	13S03865	RNA	D1	Serotype determined	( + )	ND	NA	ND	ND	NA	NA	NA	NA
474	60	13S03865	RNA	D2	Serotype determined	( + )	ND	NA	ND	ND	NA	NA	NA	NA
475	60	13S03865	RNA	D3	Serotype determined	( + )	3	NA	3	225	D3	NG		NG	50	15	15	1643	196	65	78	41	58	0.828961
476	60	13S03865	RNA	D4	Serotype determined	( + )	ND	NA	ND	ND	NA	NA	NA	NA
477	60	13S03865	serum	D1	Serotype determined	( + )	ND	NA	ND	ND	NA	NA	NA	NA
478	60	13S03865	serum	D2	Serotype determined	( + )	ND	NA	ND	ND	NA	NA	NA	NA
479	60	13S03865	serum	D3	Serotype determined	( + )	3	NA	3	157	D3	D3			429	40	39	1500	72	34	192	30	33	0.83426
480	60	13S03865	serum	D4	Serotype determined	( + )	ND	NA	ND	ND	NA	NA	NA	NA
481	61	13S03866	RNA	D1	Serotype determined	( + )	ND	NA	ND	ND	NA	NA	NA	NA
482	61	13S03866	RNA	D2	Serotype determined	( + )	ND	NA	ND	ND	NA	NA	NA	NA
483	61	13S03866	RNA	D3	Serotype determined	( + )	3	3	3	280	D3	D3	Den3:10436:A:G	Den3:10403:G:C;Den3:10436:A:G	34	32	32	3386	550	147	191	77	144	0.792232
484	61	13S03866	RNA	D4	Serotype determined	( + )	ND	NA	ND	ND	NA	NA	NA	NA
485	61	13S03866	serum	D1	Serotype determined	( + )	ND	NA	ND	ND	NA	NA	NA	NA
486	61	13S03866	serum	D2	Serotype determined	( + )	ND	NA	ND	ND	NA	NA	NA	NA
487	61	13S03866	serum	D3	Serotype determined	( + )	3	NA	ND	ND	NA	NA	NA	NA
488	61	13S03866	serum	D4	Serotype determined	( + )	ND	NA	ND	NA	NA	NA	NA	NA
489	62	13S03871	RNA	D1	Not detected	( + )	ND	NA	ND	NA	NA	NA	NA	NA
490	62	13S03871	RNA	D2	Not detected	( + )	ND	NA	ND	NA	NA	NA	NA	NA
491	62	13S03871	RNA	D3	Not detected	( + )	3	NA	3	177	NG	NG	NG	NG	541	223	0	0	0	0	0	0	0
492	62	13S03871	RNA	D4	Not detected	( + )	ND	NA	ND	ND	NA	NA	NA	NA
493	62	13S03871	serum	D1	Not detected	( + )	ND	NA	ND	ND	NA	NA	NA	NA
494	62	13S03871	serum	D2	Not detected	( + )	ND	NA	ND	ND	NA	NA	NA	NA
495	62	13S03871	serum	D3	Not detected	( + )	3	NA	ND	ND	NA	NA	NA	NA
496	62	13S03871	serum	D4	Not detected	( + )	ND	NA	ND	ND	NA	NA	NA	NA
497	63	13S03872	RNA	D1	Serotype determined	( + )	ND	NA	ND	ND	NA	NA	NA	NA
498	63	13S03872	RNA	D2	Serotype determined	( + )	ND	NA	ND	ND	NA	NA	NA	NA
499	63	13S03872	RNA	D3	Serotype determined	( + )	3	NA	3	258	D3	D3		Den3:10436:A:G	19	19	19	1873	282	98	86	51	56	0.80077
500	63	13S03872	RNA	D4	Serotype determined	( + )	ND	NA	ND	ND	NA	NA	NA	NA
501	63	13S03872	serum	D1	Serotype determined	( + )	ND	NA	ND	ND	NA	NA	NA	NA
502	63	13S03872	serum	D2	Serotype determined	( + )	ND	NA	ND	ND	NA	NA	NA	NA
503	63	13S03872	serum	D3	Serotype determined	( + )	3	NA	ND	ND	NA	NA	NA	NA
504	63	13S03872	serum	D4	Serotype determined	( + )	ND	NA	ND	ND	NA	NA	NA	NA
505	64	13S03748	RNA	D1	Serotype determined	( + )	ND	NA	ND	ND	NA	NA	NA	NA
506	64	13S03748	RNA	D2	Serotype determined	( + )	ND	NA	ND	ND	NA	NA	NA	NA
507	64	13S03748	RNA	D3	Serotype determined	( + )	ND	NA	ND	ND	NA	NA	NA	NA
508	64	13S03748	RNA	D4	Serotype determined	( + )	ND	4	4	262	D4	D4	Den4:10388:G:T	Den4:10388:G:T	292	278	275	32891	5252	2094	1629	1041	934	0.785626
509	64	13S03748	serum	D1	Serotype determined	( + )	ND	NA	ND	ND	NG	NA	NG	NA	0	0	0	0	0	0	0	0	0
510	64	13S03748	serum	D2	Serotype determined	( + )	ND	NA	ND	ND	NG	NA	NG	NA	0	0	0	0	0	0	0	0	0
511	64	13S03748	serum	D3	Serotype determined	( + )	ND	NA	ND	ND	NG	NA	NG	NA	14	4	4	174	12	5	39	4	4	0.756522
512	64	13S03748	serum	D4	Serotype determined	( + )	ND	NA	ND	ND	D4	D4			140	134	134	14974	2340	779	852	400	488	0.790393
513	65	13S03749	RNA	D1	Serotype determined	( + )	ND	NA	ND	ND	NA	NA	NA	NA
514	65	13S03749	RNA	D2	Serotype determined	( + )	ND	NA	ND	ND	NA	NA	NA	NA
515	65	13S03749	RNA	D3	Serotype determined	( + )	ND	NA	ND	ND	NA	NA	NA	NA
516	65	13S03749	RNA	D4	Serotype determined	( + )	ND	NA	4	NA	D4	D4			303	294	291	35293	5436	2316	1892	1159	1052	0.785388
517	65	13S03749	serum	D1	Serotype determined	( + )	ND	NA	ND	ND	NA	NA	NA	NA
518	65	13S03749	serum	D2	Serotype determined	( + )	ND	NA	ND	ND	NA	NA	NA	NA
519	65	13S03749	serum	D3	Serotype determined	( + )	ND	NA	ND	ND	NA	NA	NA	NA
520	65	13S03749	serum	D4	Serotype determined	( + )	ND	NA	4	203	D4	D4			584	573	573	71397	12452	3470	3959	1847	2160	0.782193
521	66	13S03754	RNA	D1	Serotype determined	( - )	ND	NA	ND	ND	NA	NA	NA	NA
522	66	13S03754	RNA	D2	Serotype determined	( - )	ND	NA	ND	ND	NA	NA	NA	NA
523	66	13S03754	RNA	D3	Serotype determined	( - )	ND	NA	ND	ND	NA	NA	NA	NA
524	66	13S03754	RNA	D4	Serotype determined	( - )	ND	NA	4	214	D4	D4	Den4:10388:G:T	Den4:10388:G:T	350	322	317	38627	6527	2331	1986	1207	1136	0.780801
525	66	13S03754	serum	D1	Serotype determined	( - )	ND	NA	ND	ND	NA	NA	NA	NA
526	66	13S03754	serum	D2	Serotype determined	( - )	ND	NA	ND	ND	NA	NA	NA	NA
527	66	13S03754	serum	D3	Serotype determined	( - )	ND	NA	ND	ND	NA	NA	NA	NA
528	66	13S03754	serum	D4	Serotype determined	( - )	ND	NA	4	184	D4	D4			1327	1295	1294	155963	25971	7123	8876	3927	4905	0.787959
529	67	13S03756	RNA	D1	Serotype determined	( - )	ND	NA	ND	ND	NA	NA	NA	NA
530	67	13S03756	RNA	D2	Serotype determined	( - )	ND	NA	ND	ND	NA	NA	NA	NA
531	67	13S03756	RNA	D3	Serotype determined	( - )	ND	NA	ND	ND	NA	NA	NA	NA
532	67	13S03756	RNA	D4	Serotype determined	( - )	4	4	4	315	D4	D4	Den4:10388:G:T	Den4:10388:G:T	22	19	17	1968	373	103	166	50	87	0.754023
533	67	13S03756	serum	D1	Serotype determined	( - )	ND	NA	ND	ND	NA	NA	NA	NA
534	67	13S03756	serum	D2	Serotype determined	( - )	ND	NA	ND	ND	NA	NA	NA	NA
535	67	13S03756	serum	D3	Serotype determined	( - )	ND	NA	ND	ND	NA	NA	NA	NA
536	67	13S03756	serum	D4	Serotype determined	( - )	4	NA	4	244	D4	D4			49	48	48	5613	956	297	294	154	166	0.783939
537	68	13S03766	RNA	D1	Serotype determined	( + )	ND	NA	ND	ND	NA	NA	NA	NA
538	68	13S03766	RNA	D2	Serotype determined	( + )	ND	NA	ND	ND	NA	NA	NA	NA
539	68	13S03766	RNA	D3	Serotype determined	( + )	ND	NA	ND	ND	NA	NA	NA	NA
540	68	13S03766	RNA	D4	Serotype determined	( + )	4	NA	4	NA	D4	D4			100	84	84	9183	2053	473	717	263	372	0.739015
541	68	13S03766	serum	D1	Serotype determined	( + )	ND	NA	ND	ND	NA	NA	NA	NA
542	68	13S03766	serum	D2	Serotype determined	( + )	ND	NA	ND	ND	NA	NA	NA	NA
543	68	13S03766	serum	D3	Serotype determined	( + )	ND	NA	ND	ND	NA	NA	NA	NA
544	68	13S03766	serum	D4	Serotype determined	( + )	4	NA	4	173	D4	D4		Den4:10388:G:T	724	704	704	87423	14439	3968	5133	2157	2811	0.787857
545	69	13S03777	RNA	D1	Multiple serotype candidates	( + )	ND	NA	1	NA	D1	NA	Den1:10527:C:T;Den1:10581:C:G	NA	101	99	99	10563	1088	287	700	165	388	0.835813
546	69	13S03777	RNA	D2	Multiple serotype candidates	( + )	ND	NA	2	NA	NG	NA	NG	NA	0	0	0	0	0	0	0	0	0
547	69	13S03777	RNA	D3	Multiple serotype candidates	( + )	ND	NA	3	NA	D3	NA	Den3:10436:A:G	NA	163	146	146	17351	1940	711	880	388	592	0.830907
548	69	13S03777	RNA	D4	Multiple serotype candidates	( + )	4	4	4	NA	D4	D4			68	68	68	7789	1391	409	461	231	261	0.775025
549	69	13S03777	serum	D1	Multiple serotype candidates	( + )	ND	NA	ND	ND	NG	NA	NG	NA	0	0	0	0	0	0	0	0	0
550	69	13S03777	serum	D2	Multiple serotype candidates	( + )	ND	NA	ND	ND	NG	NA	NG	NA	0	0	0	0	0	0	0	0	0
551	69	13S03777	serum	D3	Multiple serotype candidates	( + )	ND	NA	ND	ND	NG	NA	NG	NA	7	1	1	49	6	0	11	0	2	0.742424
552	69	13S03777	serum	D4	Multiple serotype candidates	( + )	4	NA	4	NA	D4	D4			462	381	381	39973	9021	1919	3334	1031	1720	0.73687
553	70	13S03781	RNA	D1	Multiple serotype candidates	( - )	ND	NA	1	NA	D1	NA	Den1:10553:G:A;Den1:10579:C:T	NA	70	47	47	3292	555	433	371	109	91	0.707805
554	70	13S03781	RNA	D2	Multiple serotype candidates	( - )	ND	NA	2	NA	NG	NA	NG	NA	1	0	0	0	0	0	0	0	0
555	70	13S03781	RNA	D3	Multiple serotype candidates	( - )	ND	NA	3	NA	D3	NA	Den3:10436:A:G	NA	124	103	103	11175	1239	435	601	245	378	0.830855
556	70	13S03781	RNA	D4	Multiple serotype candidates	( - )	ND	4	4	NA	D4	D4			49	48	48	5643	939	295	294	161	173	0.78692
557	70	13S03781	serum	D1	Multiple serotype candidates	( - )	ND	NA	ND	ND	NA	NA	NA	NA
558	70	13S03781	serum	D2	Multiple serotype candidates	( - )	ND	NA	ND	ND	NA	NA	NA	NA
559	70	13S03781	serum	D3	Multiple serotype candidates	( - )	ND	NA	ND	ND	NA	NA	NA	NA
560	70	13S03781	serum	D4	Multiple serotype candidates	( - )	ND	NA	4	190	D4	D4	Den4:10388:G:T		776	739	739	87787	15307	3908	5509	2114	2919	0.780253
561	71	13S03795	RNA	D1	Multiple serotype candidates	( + )	ND	NA	1	NA	D1	NA	Den1:10553:G:A	NA	80	53	53	3771	588	454	437	104	104	0.718286
562	71	13S03795	RNA	D2	Multiple serotype candidates	( + )	ND	NA	2	NA	NG	NA	NG	NA	1	0	0	0	0	0	0	0	0
563	71	13S03795	RNA	D3	Multiple serotype candidates	( + )	ND	NA	3	NA	D3	NA		NA	140	41	41	1629	75	38	272	35	34	0.808838
564	71	13S03795	RNA	D4	Multiple serotype candidates	( + )	4	4	4	NA	D4	D4			41	40	39	4605	876	243	221	138	140	0.774601
565	71	13S03795	serum	D1	Multiple serotype candidates	( + )	ND	NA	ND	ND	NG	NA	NG	NA	0	0	0	0	0	0	0	0	0
566	71	13S03795	serum	D2	Multiple serotype candidates	( + )	ND	NA	ND	ND	NG	NA	NG	NA	5	4	0	0	0	0	0	0	0
567	71	13S03795	serum	D3	Multiple serotype candidates	( + )	ND	NA	ND	ND	NG	NA	NG	NA	326	4	2	60	0	0	4	0	2	0.9375
568	71	13S03795	serum	D4	Multiple serotype candidates	( + )	4	NA	4	NA	D4	D4		Den4:10388:G:T	204	197	197	22203	4387	1018	1668	561	864	0.758403
569	72	13S03820	RNA	D1	Serotype determined	( + )	ND	NA	ND	ND	NA	NA	NA	NA
570	72	13S03820	RNA	D2	Serotype determined	( + )	ND	NA	ND	ND	NA	NA	NA	NA
571	72	13S03820	RNA	D3	Serotype determined	( + )	ND	NA	ND	ND	NA	NA	NA	NA
572	72	13S03820	RNA	D4	Serotype determined	( + )	4	NA	4	NA	D4	D4		Den4:10388:G:T	97	76	76	8200	1871	478	586	263	296	0.736417
573	72	13S03820	serum	D1	Serotype determined	( + )	ND	NA	ND	ND	NA	NA	NA	NA
574	72	13S03820	serum	D2	Serotype determined	( + )	ND	NA	ND	ND	NA	NA	NA	NA
575	72	13S03820	serum	D3	Serotype determined	( + )	ND	NA	ND	ND	NA	NA	NA	NA
576	72	13S03820	serum	D4	Serotype determined	( + )	4	NA	ND	ND	NA	NA	NA	NA
577	73	13S03825	RNA	D1	Serotype determined	( - )	ND	NA	ND	ND	NA	NA	NA	NA
578	73	13S03825	RNA	D2	Serotype determined	( - )	ND	NA	ND	ND	NA	NA	NA	NA
579	73	13S03825	RNA	D3	Serotype determined	( - )	ND	NA	ND	ND	NA	NA	NA	NA
580	73	13S03825	RNA	D4	Serotype determined	( - )	ND	4	4	NA	D4	D4		Den4:10405:C:T	57	52	52	5813	1136	229	575	125	278	0.749774
581	73	13S03825	serum	D1	Serotype determined	( - )	ND	NA	ND	ND	NA	NA	NA	NA
582	73	13S03825	serum	D2	Serotype determined	( - )	ND	NA	ND	ND	NA	NA	NA	NA
583	73	13S03825	serum	D3	Serotype determined	( - )	ND	NA	ND	ND	NA	NA	NA	NA
584	73	13S03825	serum	D4	Serotype determined	( - )	ND	NA	4	201	D4	D4	Den4:10388:G:T	Den4:10388:G:T	310	284	284	31042	6488	1682	2248	897	1228	0.748722
585	74	13S03833	RNA	D1	Serotype determined	( + )	ND	NA	ND	ND	NA	NA	NA	NA
586	74	13S03833	RNA	D2	Serotype determined	( + )	ND	NA	ND	ND	NA	NA	NA	NA
587	74	13S03833	RNA	D3	Serotype determined	( + )	ND	NA	ND	ND	NA	NA	NA	NA
588	74	13S03833	RNA	D4	Serotype determined	( + )	ND	NA	4	NA	D4	D4		Den4:10388:G:T	107	82	82	8796	1942	448	734	252	367	0.737919
589	74	13S03833	serum	D1	Serotype determined	( + )	ND	NA	ND	ND	NA	NA	NA	NA
590	74	13S03833	serum	D2	Serotype determined	( + )	ND	NA	ND	ND	NA	NA	NA	NA
591	74	13S03833	serum	D3	Serotype determined	( + )	ND	NA	ND	ND	NA	NA	NA	NA
592	74	13S03833	serum	D4	Serotype determined	( + )	ND	NA	ND	ND	NA	NA	NA	NA
593	75	13S03845	RNA	D1	Serotype determined	( - )	ND	NA	ND	ND	NA	NA	NA	NA
594	75	13S03845	RNA	D2	Serotype determined	( - )	ND	NA	ND	ND	NA	NA	NA	NA
595	75	13S03845	RNA	D3	Serotype determined	( - )	ND	NA	ND	ND	NA	NA	NA	NA
596	75	13S03845	RNA	D4	Serotype determined	( - )	ND	4	4	215	NG	D4	NG		1	0	0	0	0	0	0	0	0
597	75	13S03845	serum	D1	Serotype determined	( - )	ND	NA	ND	ND	NG	NA	NG	NA	0	0	0	0	0	0	0	0	0
598	75	13S03845	serum	D2	Serotype determined	( - )	ND	NA	ND	ND	NG	NA	NG	NA	0	0	0	0	0	0	0	0	0
599	75	13S03845	serum	D3	Serotype determined	( - )	ND	NA	ND	ND	NG	NA	NG	NA	2	0	0	0	0	0	0	0	0
600	75	13S03845	serum	D4	Serotype determined	( - )	ND	NA	4	NA	D4	D4		Den4:10388:G:T	582	477	477	50581	11364	2106	4928	1180	2485	0.733281
601	76	13S03846	RNA	D1	Serotype determined	( - )	ND	NA	ND	ND	NA	NA	NA	NA
602	76	13S03846	RNA	D2	Serotype determined	( - )	ND	NA	ND	ND	NA	NA	NA	NA
603	76	13S03846	RNA	D3	Serotype determined	( - )	ND	NA	ND	ND	NA	NA	NA	NA
604	76	13S03846	RNA	D4	Serotype determined	( - )	ND	NA	4	255	D4	D4		Den4:10388:G:T	69	52	52	5657	1308	300	425	161	220	0.735631
605	76	13S03846	serum	D1	Serotype determined	( - )	ND	NA	ND	ND	NA	NA	NA	NA
606	76	13S03846	serum	D2	Serotype determined	( - )	ND	NA	ND	ND	NA	NA	NA	NA
607	76	13S03846	serum	D3	Serotype determined	( - )	ND	NA	ND	ND	NA	NA	NA	NA
608	76	13S03846	serum	D4	Serotype determined	( - )	ND	NA	ND	ND	NA	NA	NA	NA
609	77	13S03854	RNA	D1	Serotype determined	( - )	ND	NA	ND	ND	NA	NA	NA	NA
610	77	13S03854	RNA	D2	Serotype determined	( - )	ND	NA	ND	ND	NA	NA	NA	NA
611	77	13S03854	RNA	D3	Serotype determined	( - )	ND	NA	ND	ND	NA	NA	NA	NA
612	77	13S03854	RNA	D4	Serotype determined	( - )	4	NA	4	285	D4	D4		Den4:10388:G:T	33	23	23	2373	555	97	212	61	107	0.733086
613	77	13S03854	serum	D1	Serotype determined	( - )	ND	NA	ND	ND	NA	NA	NA	NA
614	77	13S03854	serum	D2	Serotype determined	( - )	ND	NA	ND	ND	NA	NA	NA	NA
615	77	13S03854	serum	D3	Serotype determined	( - )	ND	NA	ND	ND	NA	NA	NA	NA
616	77	13S03854	serum	D4	Serotype determined	( - )	4	NA	ND	ND	NA	NA	NA	NA
617	78	13S03859	RNA	D1	Serotype determined	( - )	ND	NA	ND	ND	NA	NA	NA	NA
618	78	13S03859	RNA	D2	Serotype determined	( - )	ND	NA	ND	ND	NA	NA	NA	NA
619	78	13S03859	RNA	D3	Serotype determined	( - )	ND	NA	ND	ND	NA	NA	NA	NA
620	78	13S03859	RNA	D4	Serotype determined	( - )	ND	NA	4	273	D4	D4		Den4:10388:G:T	61	52	52	5673	1218	297	432	165	220	0.744488
621	78	13S03859	serum	D1	Serotype determined	( - )	ND	NA	ND	ND	NA	NA	NA	NA
622	78	13S03859	serum	D2	Serotype determined	( - )	ND	NA	ND	ND	NA	NA	NA	NA
623	78	13S03859	serum	D3	Serotype determined	( - )	ND	NA	ND	ND	NA	NA	NA	NA
624	78	13S03859	serum	D4	Serotype determined	( - )	ND	NA	4	156	D4	D4		Den4:10405:C:T	492	457	456	51560	11033	2804	3705	1544	1959	0.746143
625	79	13S03868	RNA	D1	Serotype determined	( + )	ND	NA	ND	ND	NA	NA	NA	NA
626	79	13S03868	RNA	D2	Serotype determined	( + )	ND	NA	ND	ND	NA	NA	NA	NA
627	79	13S03868	RNA	D3	Serotype determined	( + )	ND	NA	ND	ND	NA	NA	NA	NA
628	79	13S03868	RNA	D4	Serotype determined	( + )	4	NA	4	264	D4	D4		Den4:10388:G:T	28	20	20	2147	532	114	196	57	96	0.7183
629	79	13S03868	serum	D1	Serotype determined	( + )	ND	NA	ND	ND	NA	NA	NA	NA
630	79	13S03868	serum	D2	Serotype determined	( + )	ND	NA	ND	ND	NA	NA	NA	NA
631	79	13S03868	serum	D3	Serotype determined	( + )	ND	NA	ND	ND	NA	NA	NA	NA
632	79	13S03868	serum	D4	Serotype determined	( + )	4	NA	ND	ND	NA	NA	NA	NA
633	80	13S03874	RNA	D1	Serotype determined	( + )	ND	NA	ND	ND	NA	NA	NA	NA
634	80	13S03874	RNA	D2	Serotype determined	( + )	ND	NA	ND	ND	NA	NA	NA	NA
635	80	13S03874	RNA	D3	Serotype determined	( + )	ND	NA	ND	ND	NA	NA	NA	NA
636	80	13S03874	RNA	D4	Serotype determined	( + )	4	NA	4	134	D4	D4			39	39	31	3435	722	189	274	101	141	0.743506
637	80	13S03874	serum	D1	Serotype determined	( + )	ND	NA	ND	ND	NA	NA	NA	NA
638	80	13S03874	serum	D2	Serotype determined	( + )	ND	NA	ND	ND	NA	NA	NA	NA
639	80	13S03874	serum	D3	Serotype determined	( + )	ND	NA	ND	ND	NA	NA	NA	NA
640	80	13S03874	serum	D4	Serotype determined	( + )	4	NA	ND	ND	NA	NA	NA	NA
